# Supplementary material
Source: PubMed Central journal article supplement (PMC3999266)

# Supplementary Figure 1: Mean Cycle Threshold ( $Ct_{\text{average\_for\_sample}}$ ) of miRNAs from plasma and cell samples

a

## Average CT (Panel 1)

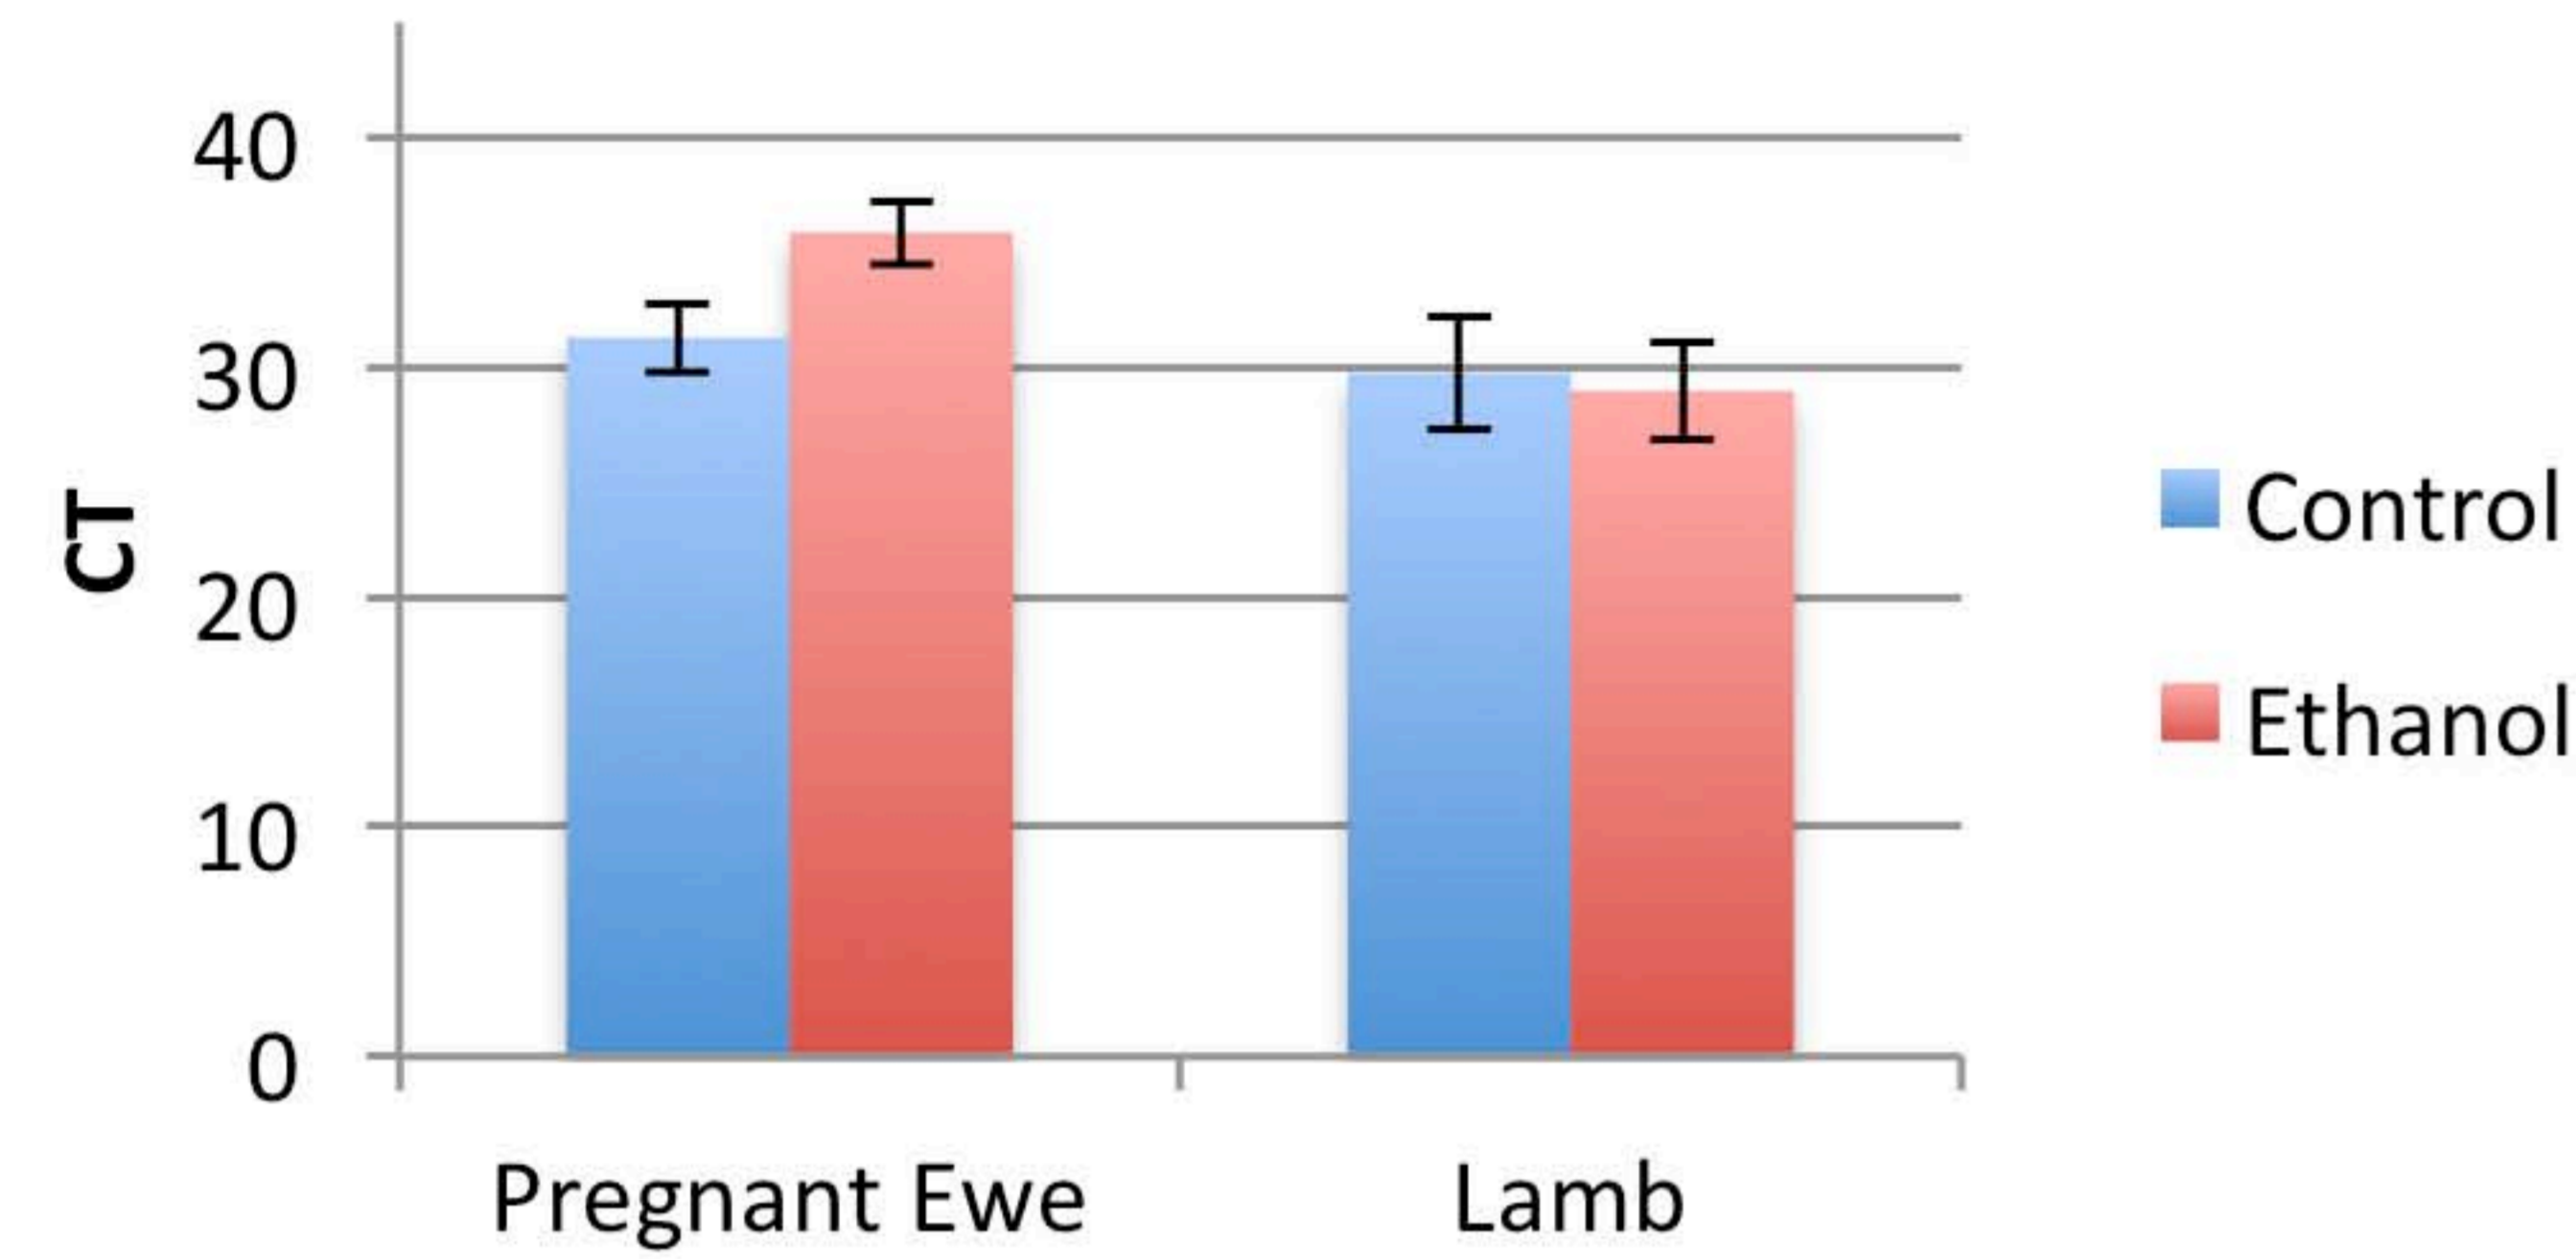

b

## Average CT (Panel 2)

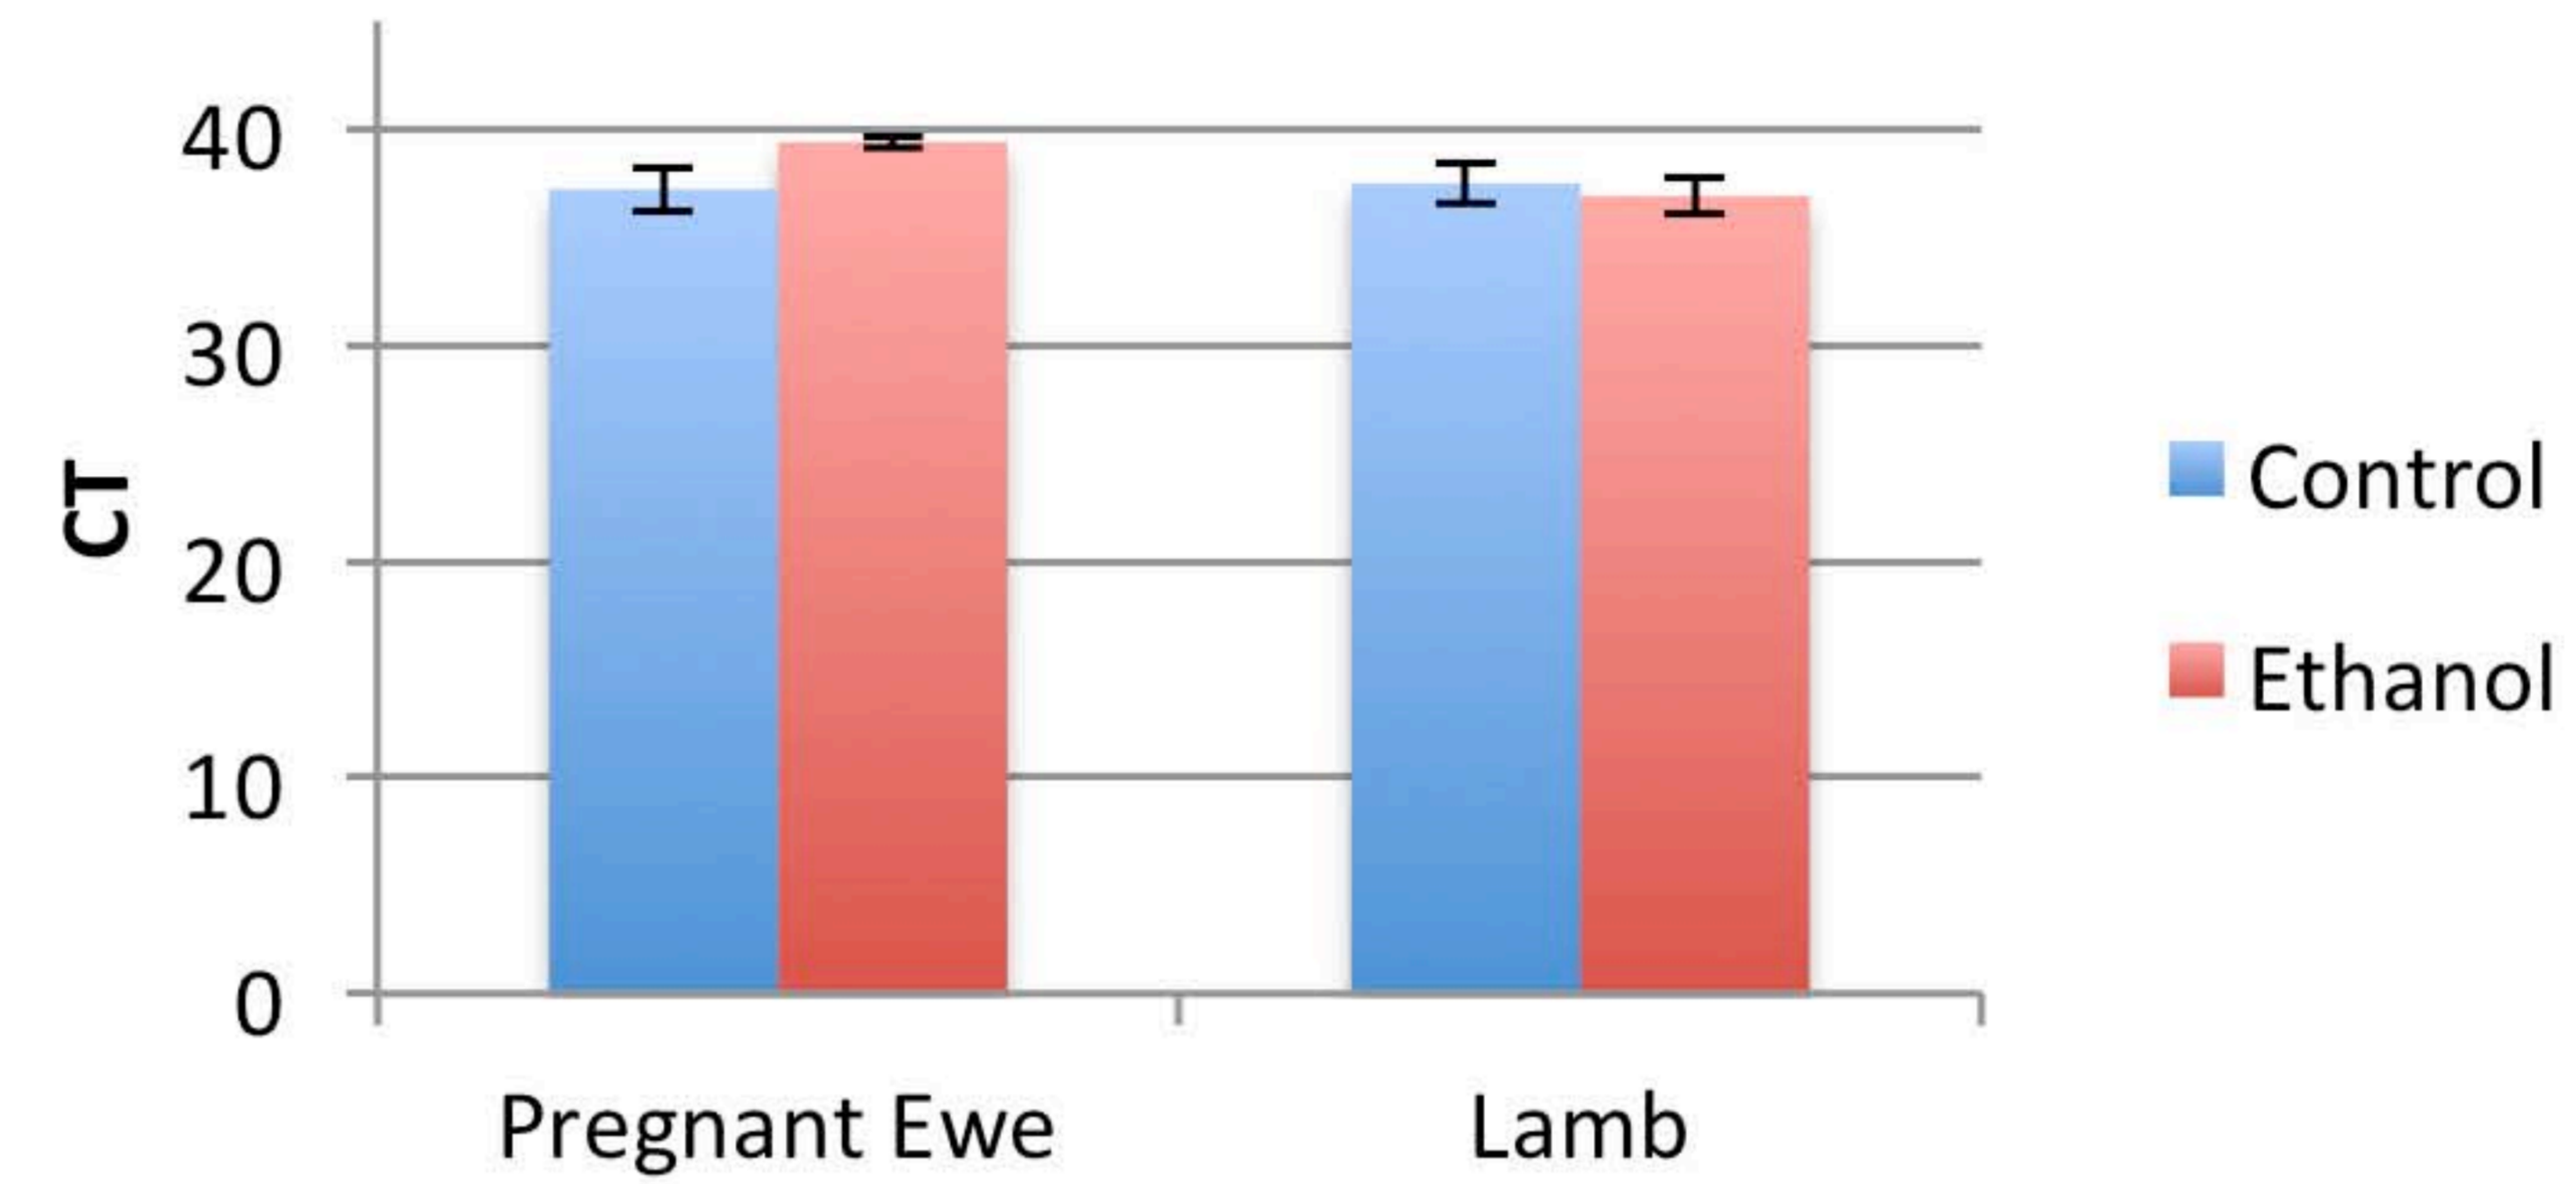

## Average CT: Cells vs. Plasma

c

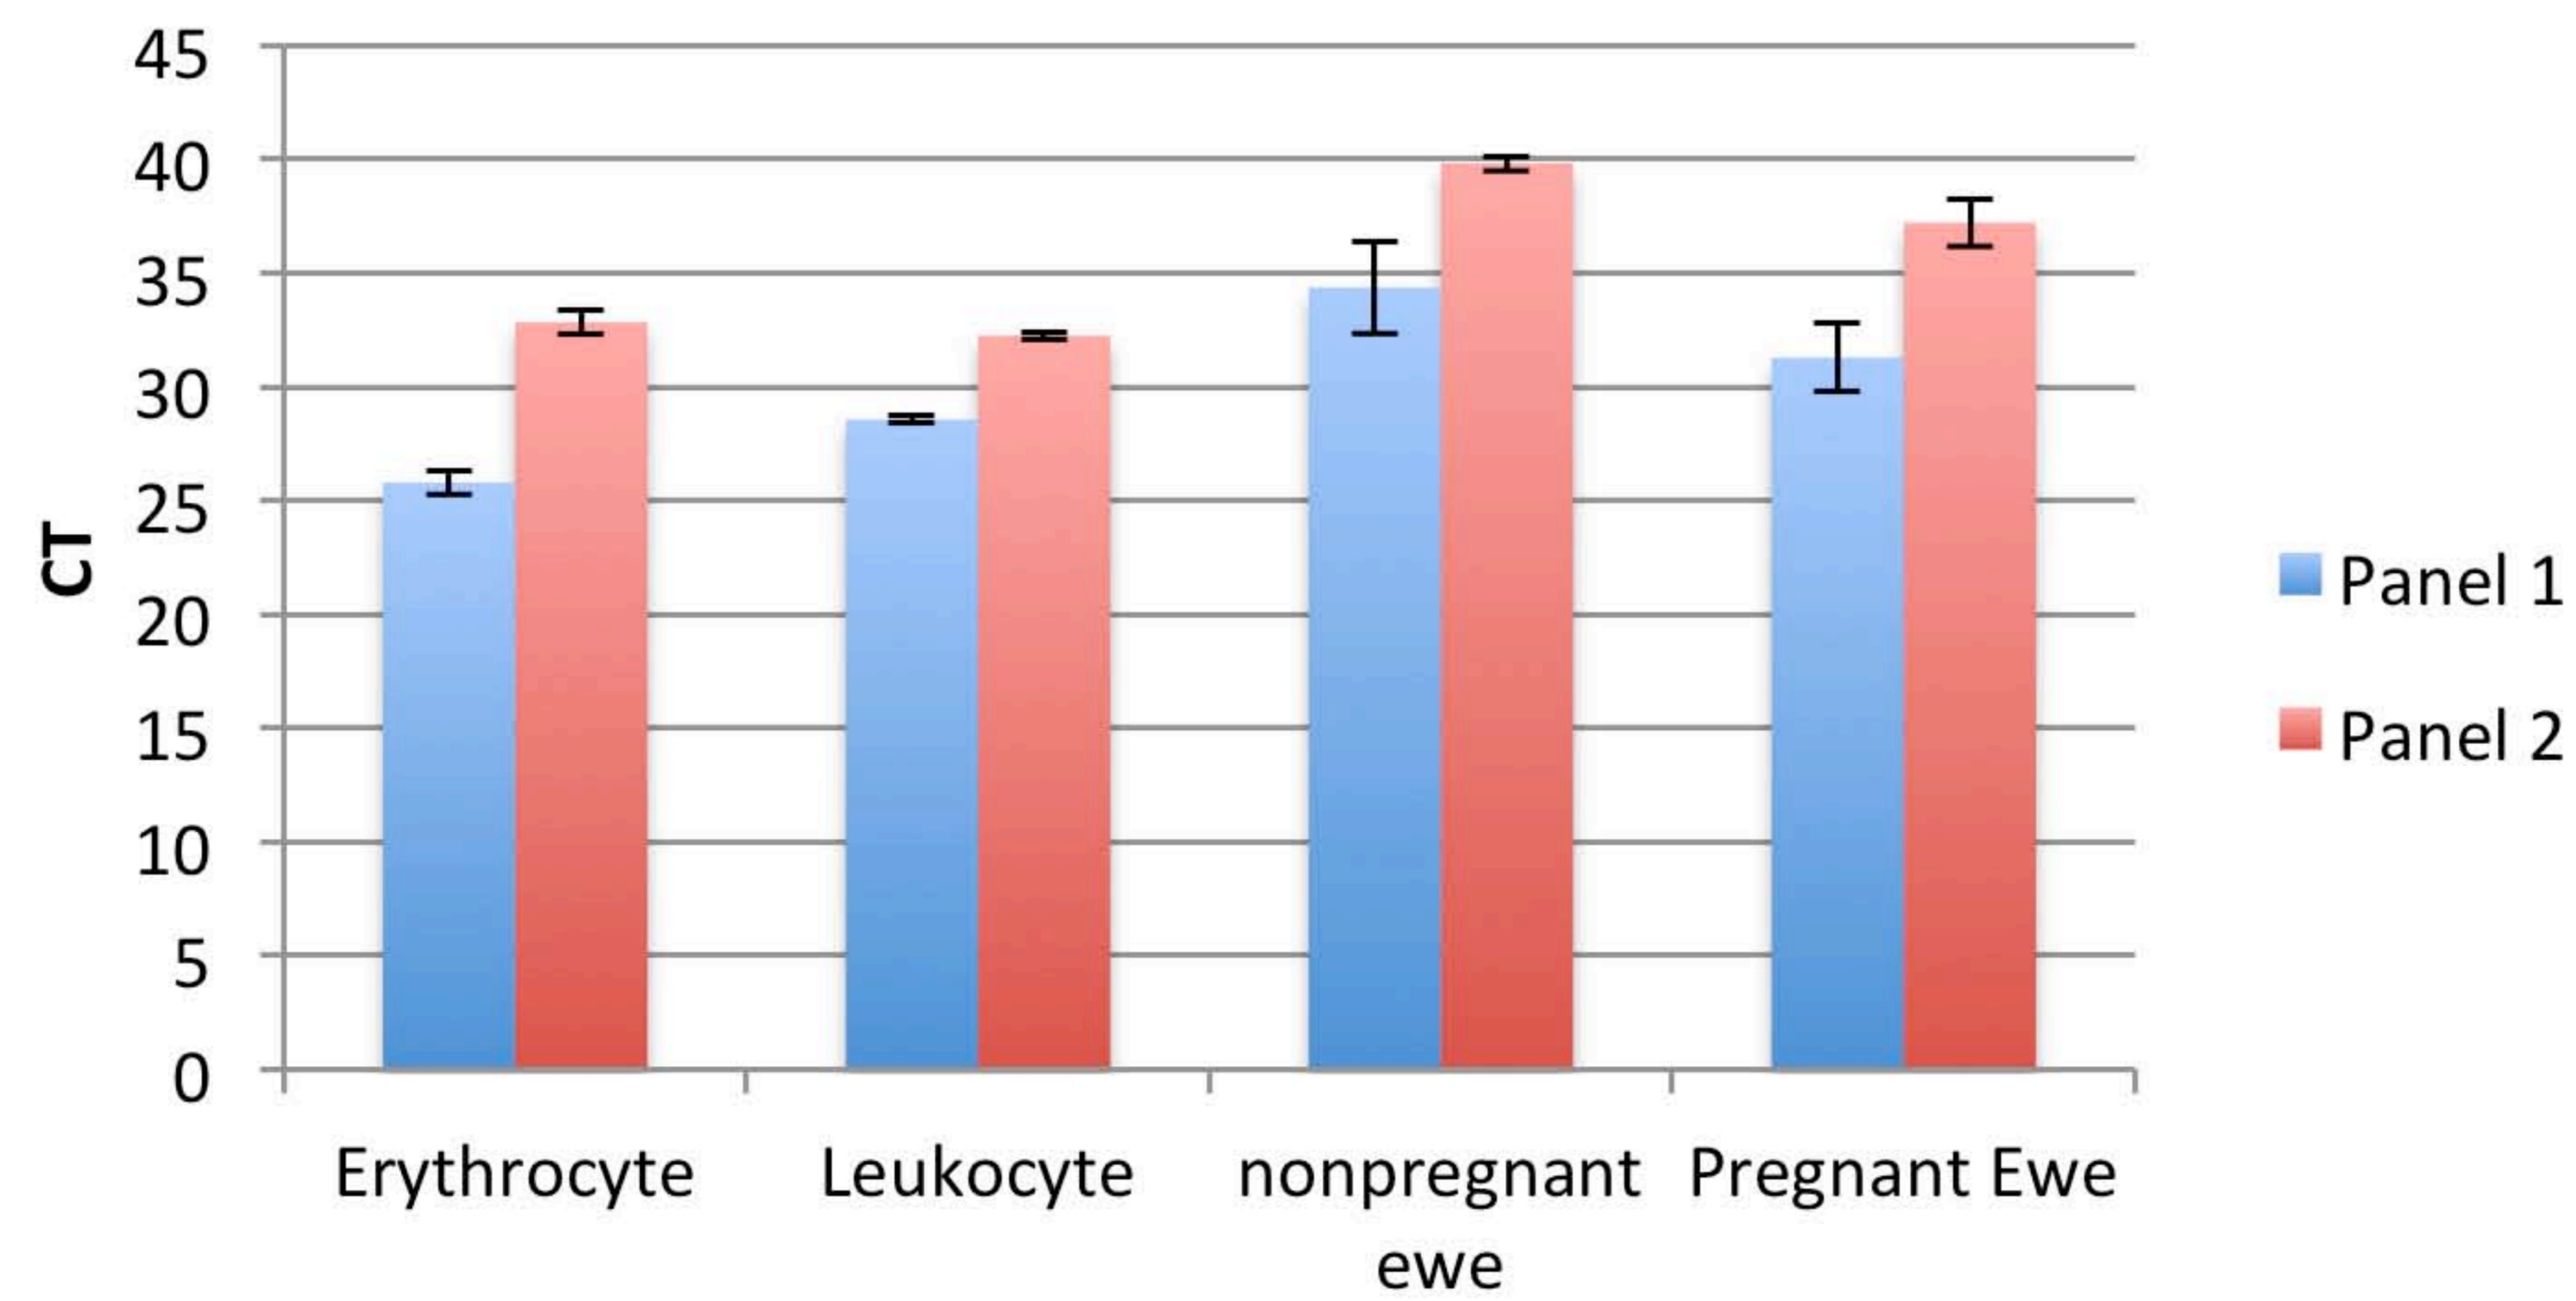



# Supplementary Figure 2: Specificity and reliability data for plasma miRNAs

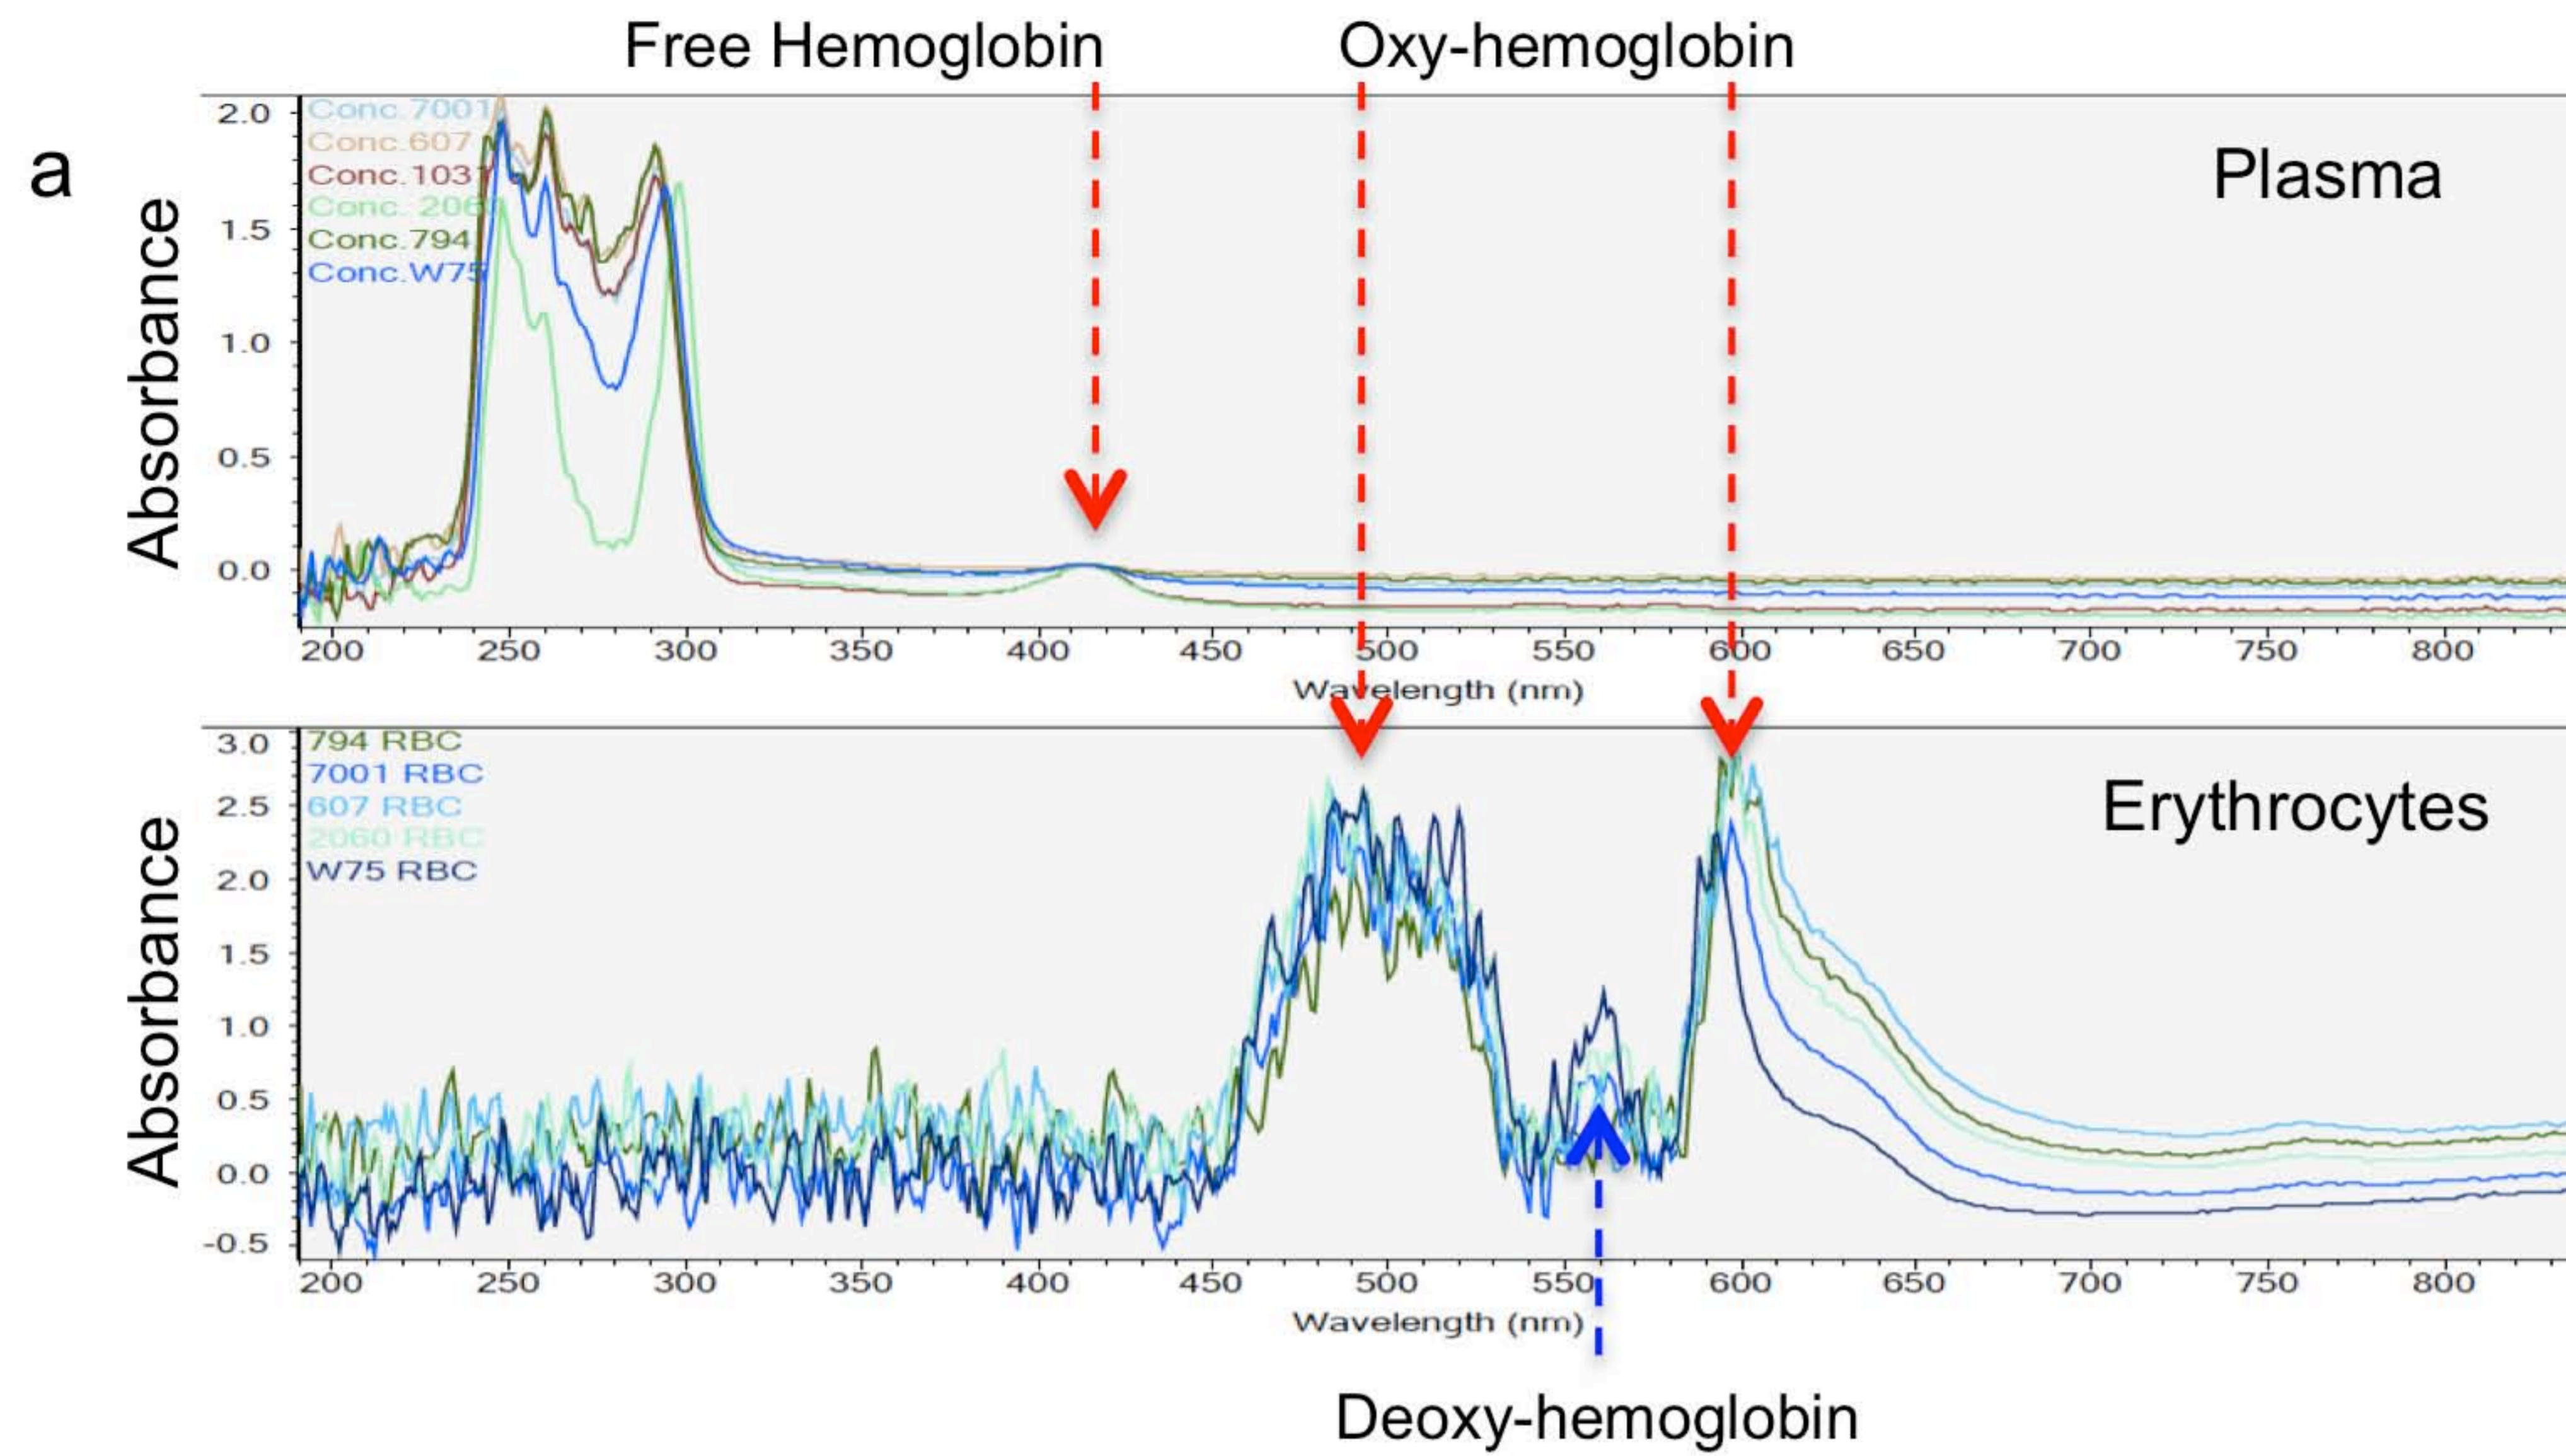

**c**

**Expression of erythrocyte and leukocyte-enriched miRNAs in plasma\***

| miRNA             | Enriched compartment | Fold-enrichment relative to plasma |
|-------------------|----------------------|------------------------------------|
| <b>miR-16</b>     | erythrocyte          | 6598.95                            |
| <b>miR-451</b>    | erythrocyte          | 401.66                             |
| <b>miR-486-5p</b> | erythrocyte          | 201.82                             |
| <b>miR-92a</b>    | erythrocyte          | 514.17                             |
| <b>miR-150</b>    | lymphoid             | 471.17                             |
| <b>let-7a</b>     | myeloid              | 43.59                              |
| <b>miR-197</b>    | myeloid              | 20.31                              |
| <b>miR-223</b>    | myeloid              | 30.12                              |

\* Comparison between cell and plasma compartments were based on data from non-pregnant ewes.

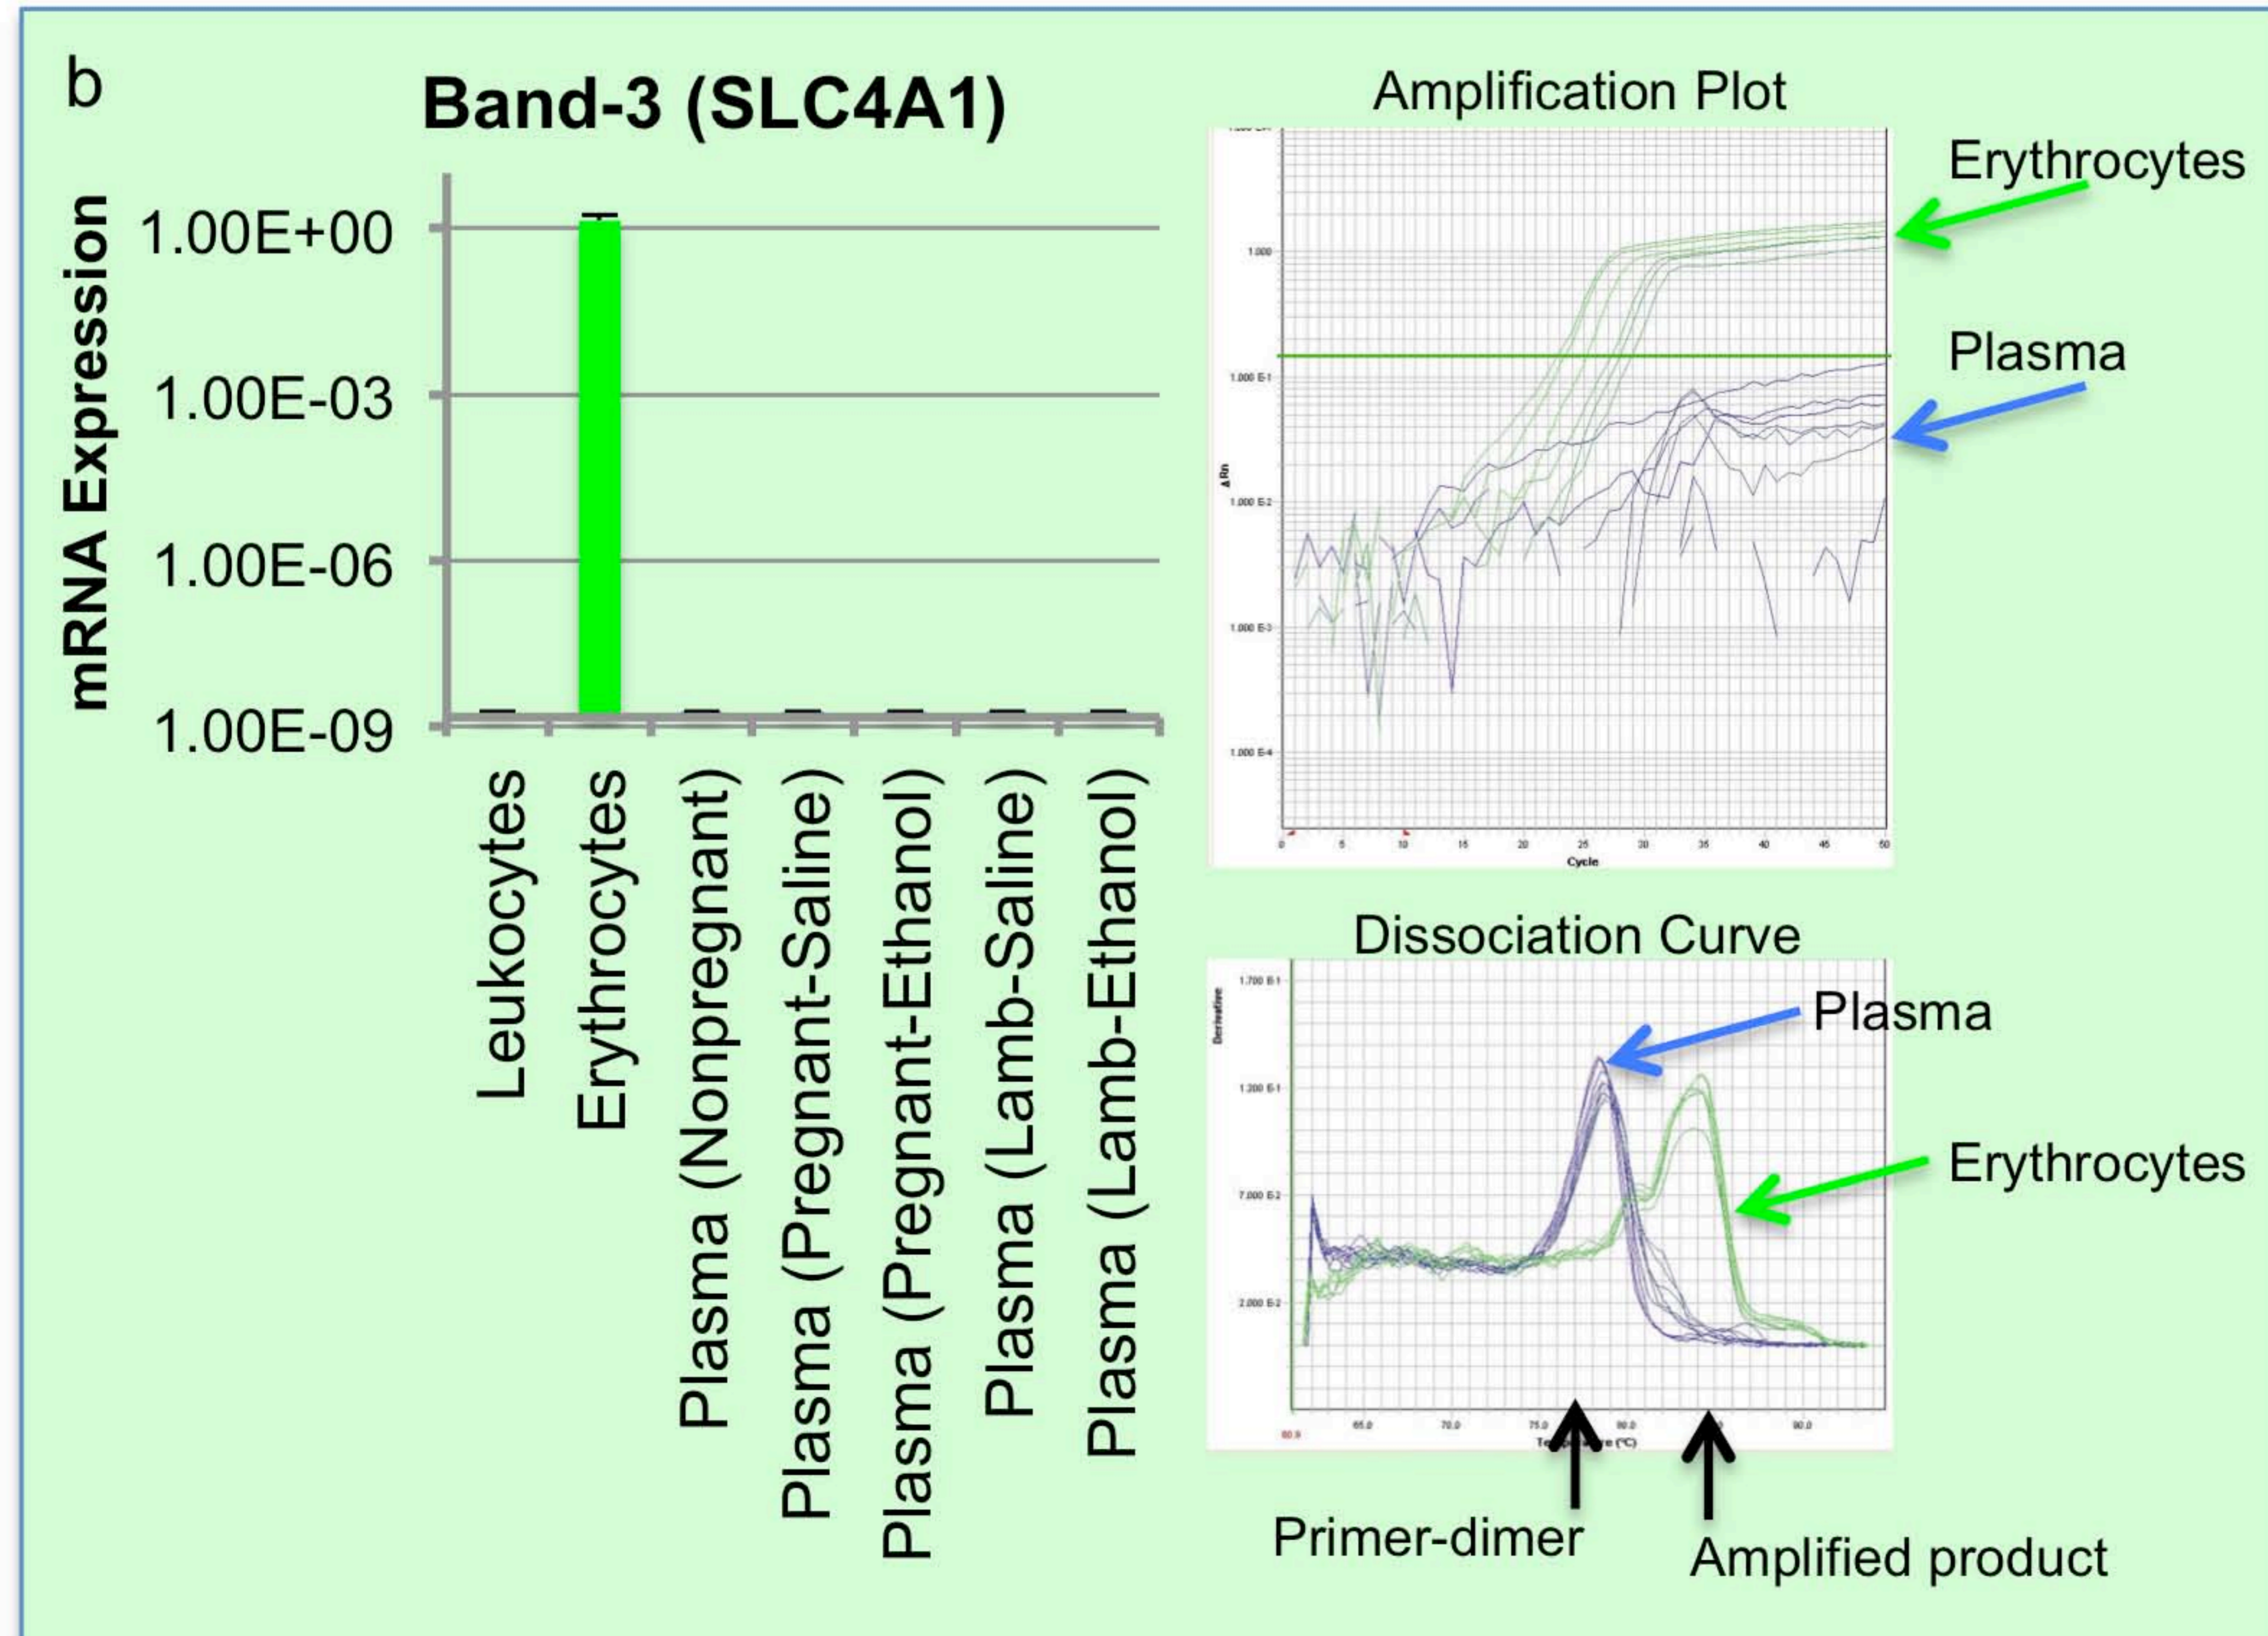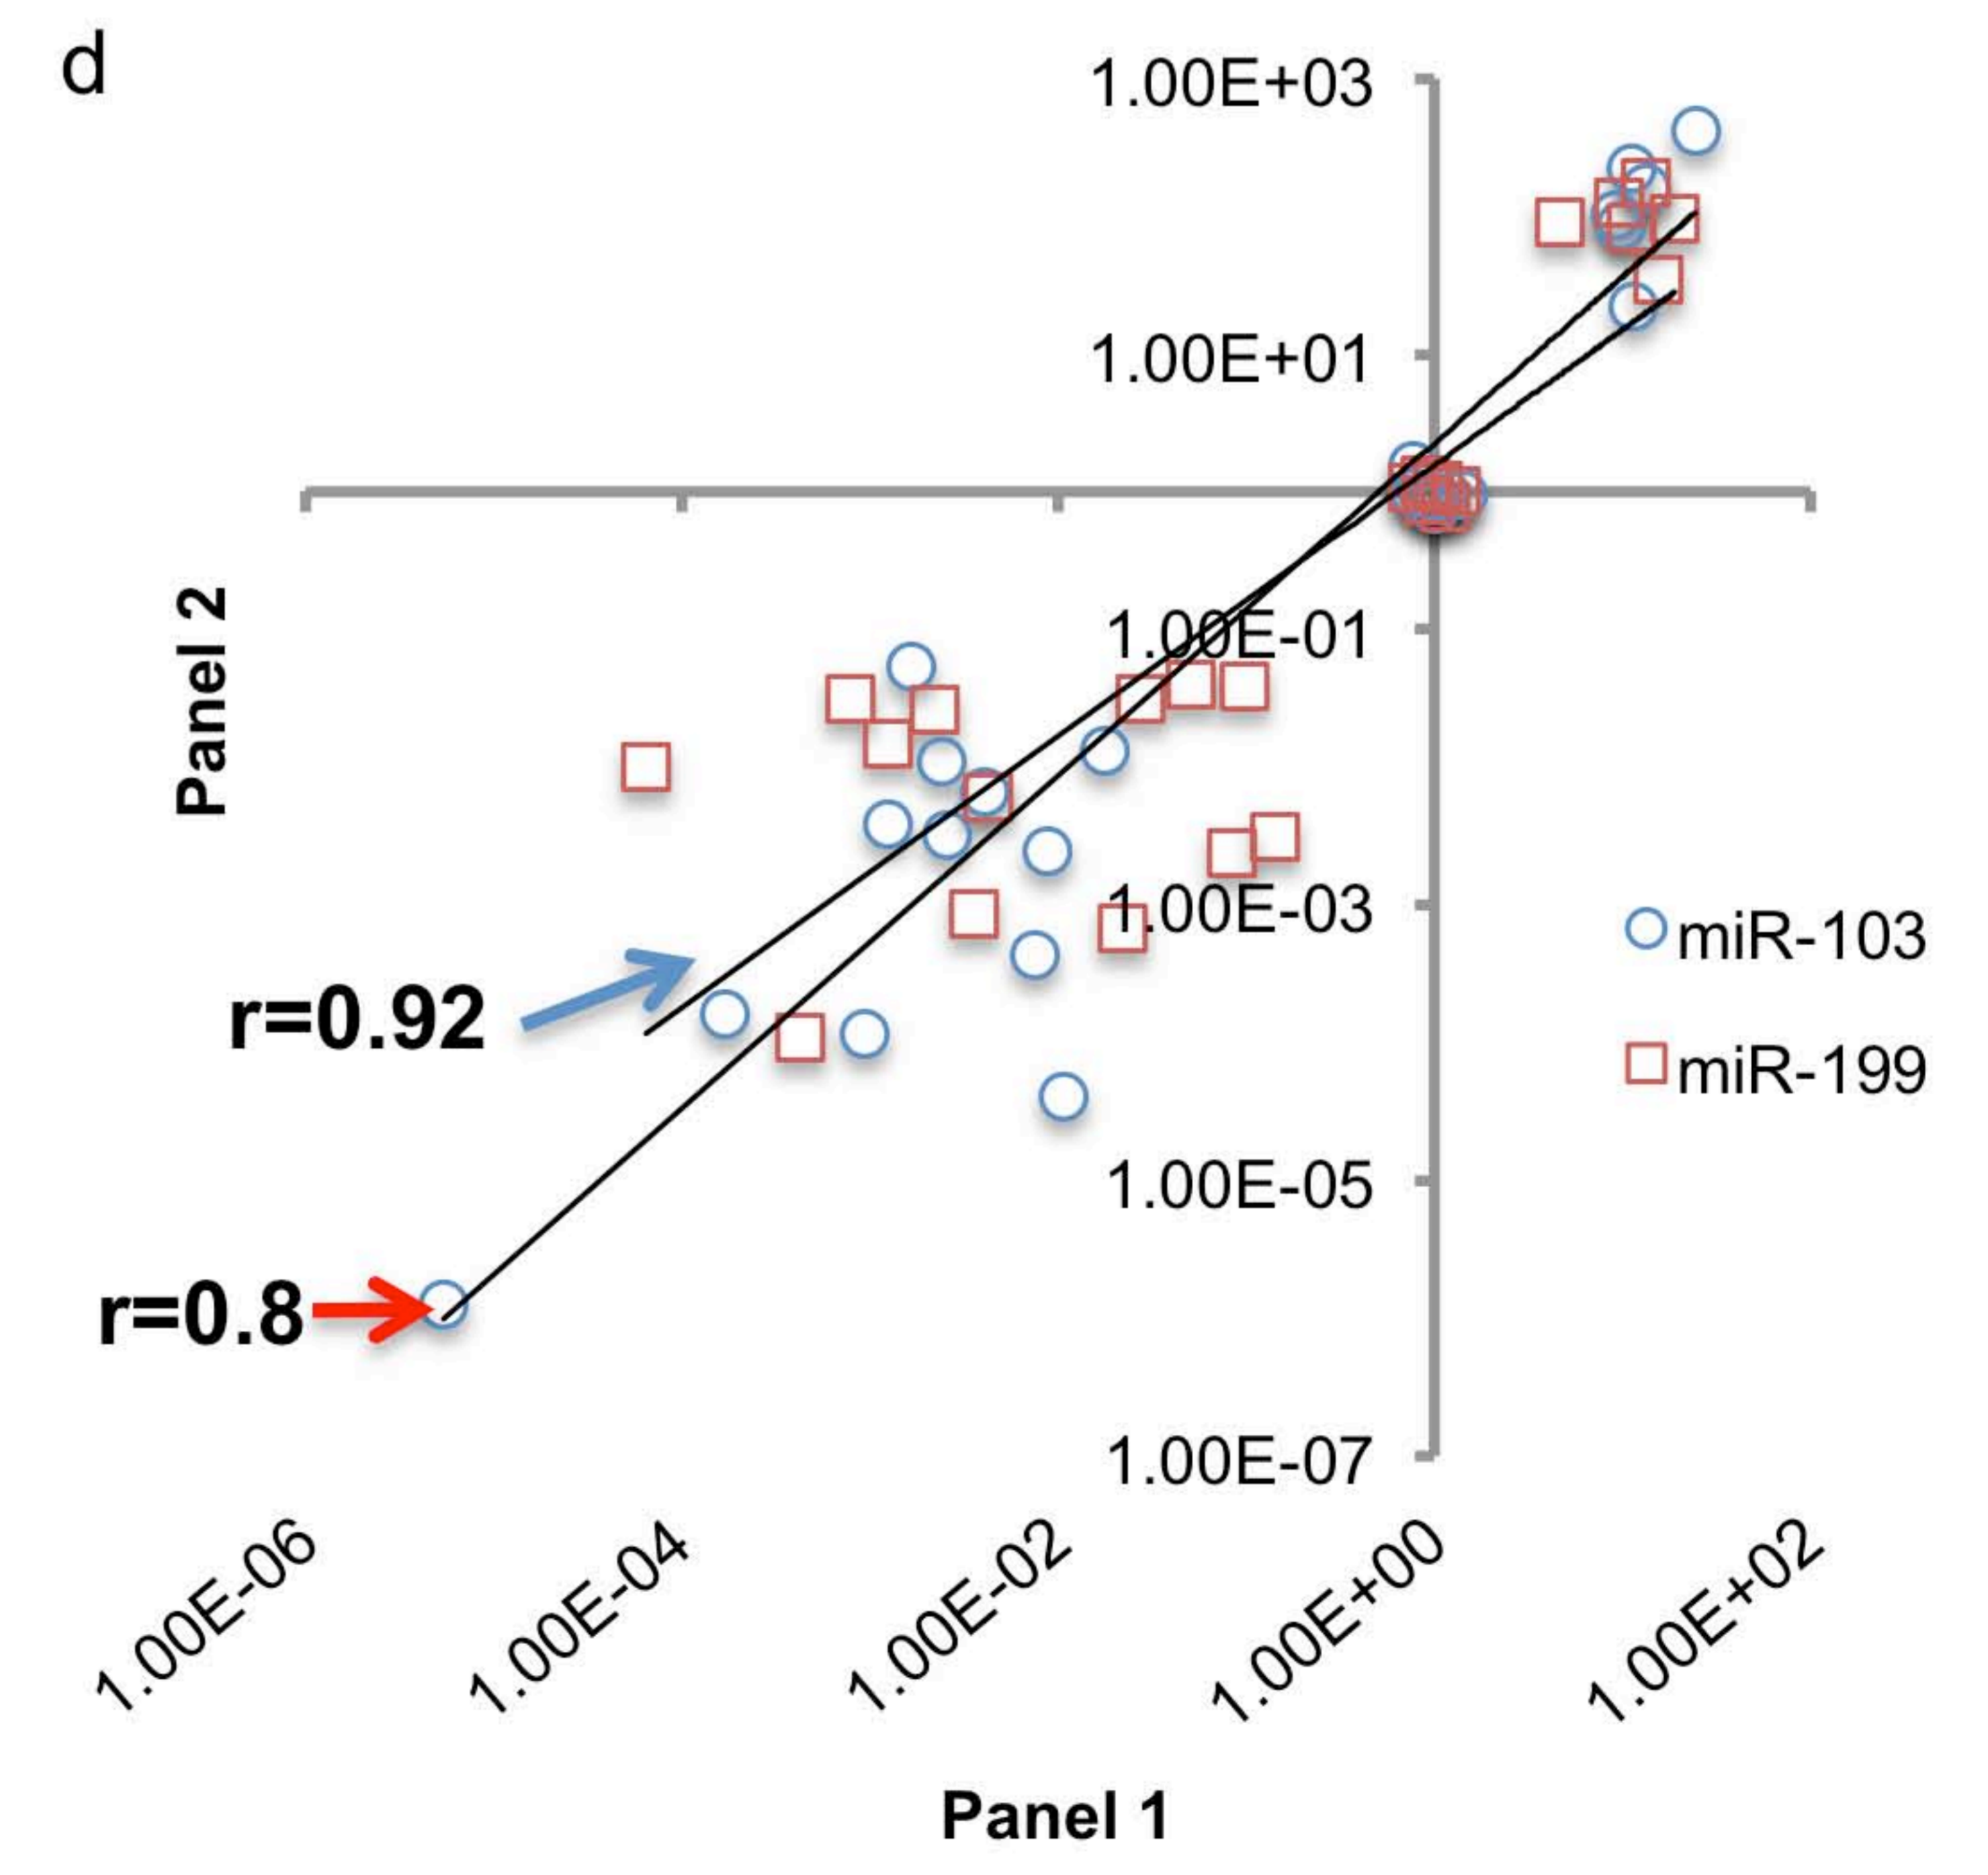



**Supplementary Figure 3:** Tables showing fold-change in miRNA content for PCA component 1 and 2 miRNAs represented graphically in Figures 3 and 6

a

| Fold-Change ( $2^{-\Delta\Delta CT}$ ) relative to Leukocytes |              |              |                           |                       |                 |
|---------------------------------------------------------------|--------------|--------------|---------------------------|-----------------------|-----------------|
| Cells                                                         |              | Plasma       |                           |                       | Gene Title      |
| Leukocytes                                                    | Erythrocytes | Non-pregnant | Pregnant (Saline Exposed) | Lamb (Saline Exposed) |                 |
|                                                               |              |              |                           |                       |                 |
| 1                                                             | 8.87E+01     | 9.02E-04     | 1.82E-03                  | 4.08E-03              | hsa-miR-554     |
| 1                                                             | 2.21E+00     | 1.34E-04     | 4.10E-03                  | 5.20E-03              | hsa-miR-30b     |
| 1                                                             | 6.86E+00     | 4.04E-04     | 2.06E-03                  | 3.29E-04              | hsa-miR-425     |
| 1                                                             | 1.83E-01     | 3.46E+06     | 1.34E+04                  | 3.80E+04              | hsa-miR-520c-3p |
| 1                                                             | 1.38E-01     | 9.19E+02     | 6.69E+02                  | 6.92E+04              | hsa-miR-556-3p  |
| 1                                                             | 5.86E-04     | 8.64E+02     | 1.55E+03                  | 2.31E+02              | hsa-miR-624*    |
| 1                                                             | 2.79E-03     | 1.59E+03     | 3.19E+05                  | 1.32E+03              | hsa-miR-488     |

 Decreased relative to Leukocytes  
 Similar to Leukocytes  
 Increased relative to Leukocytes

b

| Fold-Change ( $2^{-\Delta\Delta CT}$ ) relative to Control Pregnant Ewe |          |               |          |                |
|-------------------------------------------------------------------------|----------|---------------|----------|----------------|
| Pregnant Ewe                                                            |          | Neonatal Lamb |          | Gene Title     |
| Control                                                                 | Ethanol  | Control       | Ethanol  |                |
| 1                                                                       | 4.70E+00 | 4.42E-01      | 9.31E-05 | hsa-miR-572    |
| 1                                                                       | 1.65E+01 | 9.75E-01      | 9.05E-05 | hsa-miR-720    |
| 1                                                                       | 5.26E+00 | 6.83E-02      | 3.31E-03 | hsa-miR-570    |
| 1                                                                       | 1.72E+01 | 6.12E+00      | 2.37E-01 | hsa-miR-19b    |
| 1                                                                       | 1.55E+01 | 1.37E+00      | 1.93E-02 | hsa-miR-20a    |
| 1                                                                       | 5.24E+01 | 1.66E+02      | 1.35E-01 | hsa-miR-9      |
| 1                                                                       | 5.51E+00 | 2.68E+00      | 1.28E+03 | hsa-let-7d*    |
| 1                                                                       | 3.45E+01 | 8.43E+00      | 2.94E-01 | hsa-miR-15b    |
| 1                                                                       | 8.70E-01 | 7.42E-01      | 8.41E-04 | hsa-let-7a     |
| 1                                                                       | 1.18E+02 | 5.66E+00      | 1.03E+04 | hsa-miR-200a   |
| 1                                                                       | 1.31E-04 | 8.64E-02      | 1.31E-05 | hsa-miR-622    |
| 1                                                                       | 1.53E+00 | 2.01E+00      | 1.82E+04 | hsa-miR-34b    |
| 1                                                                       | 1.98E-05 | 3.19E-03      | 2.70E-01 | hsa-miR-29b-2* |

 Decreased Relative to Control Pregnant Ewe  
 Similar to Control Pregnant Ewe  
 Increased Relative to Control Pregnant Ewe



**Supplementary Figure 4:** PCA analysis of Panel 1 miRNAs. Principal component 3 separates control pregnant sheep from control newborn lamb plasma miRNAs indicating that the plasma miRNA profiles in the two tissues are similar.

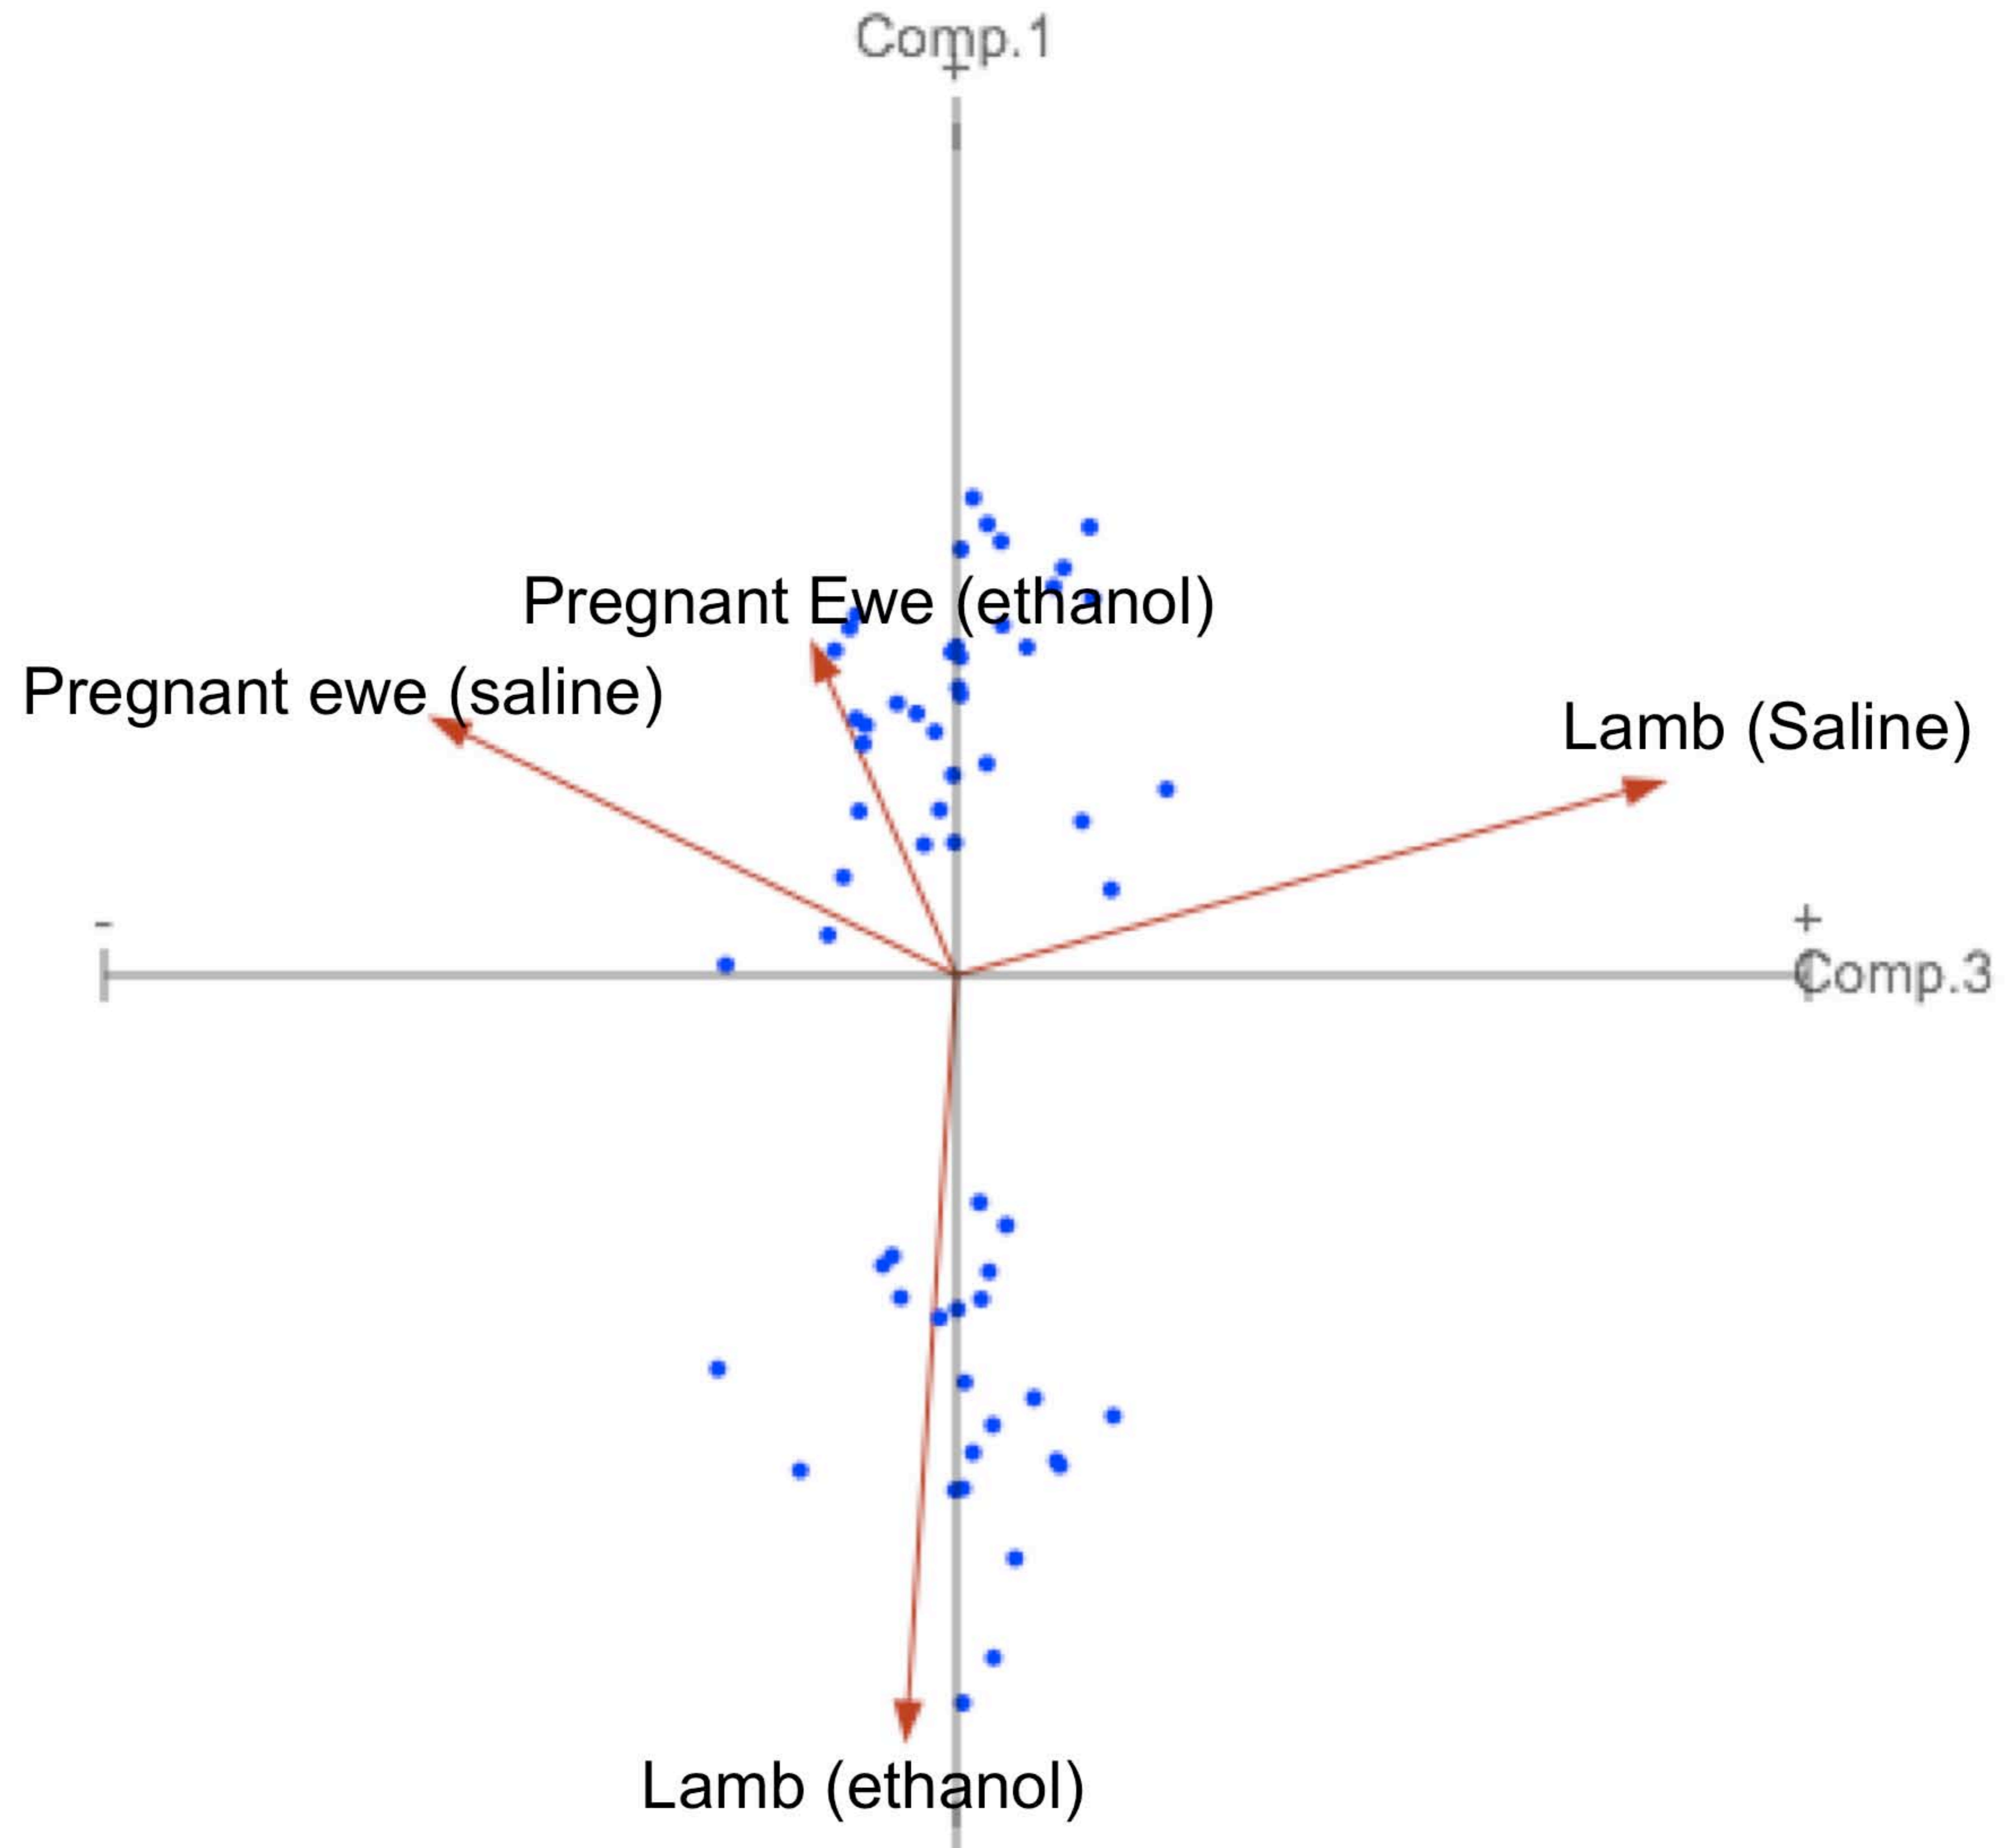



Supplementary Figure 5: Sex-dependent variability in plasma miRNA expression profiles in the neonate

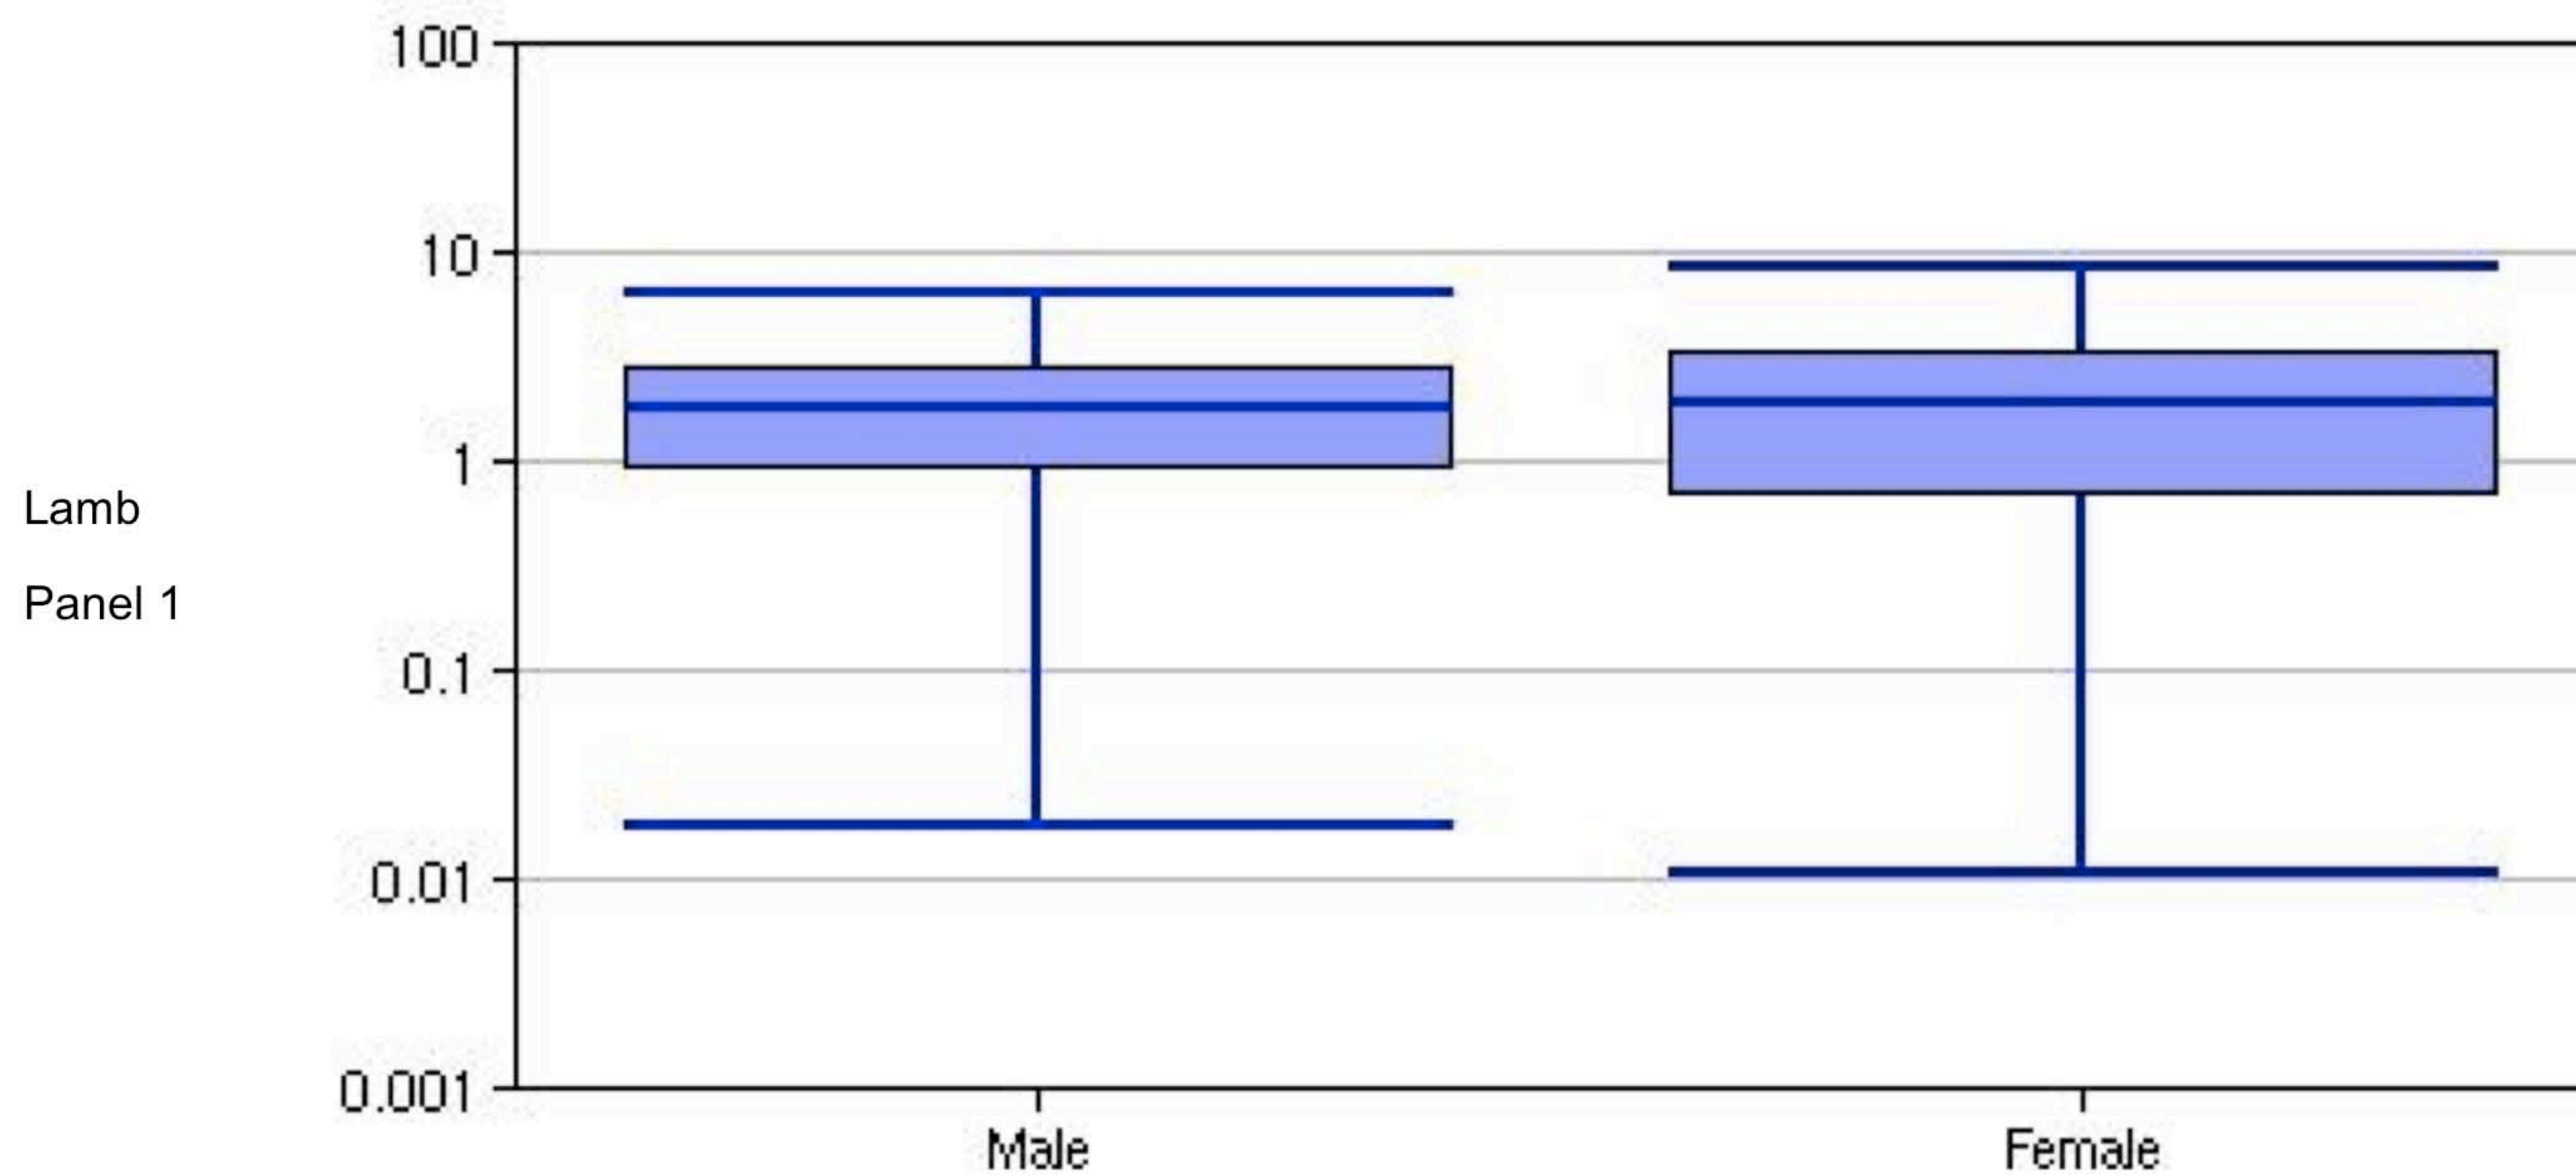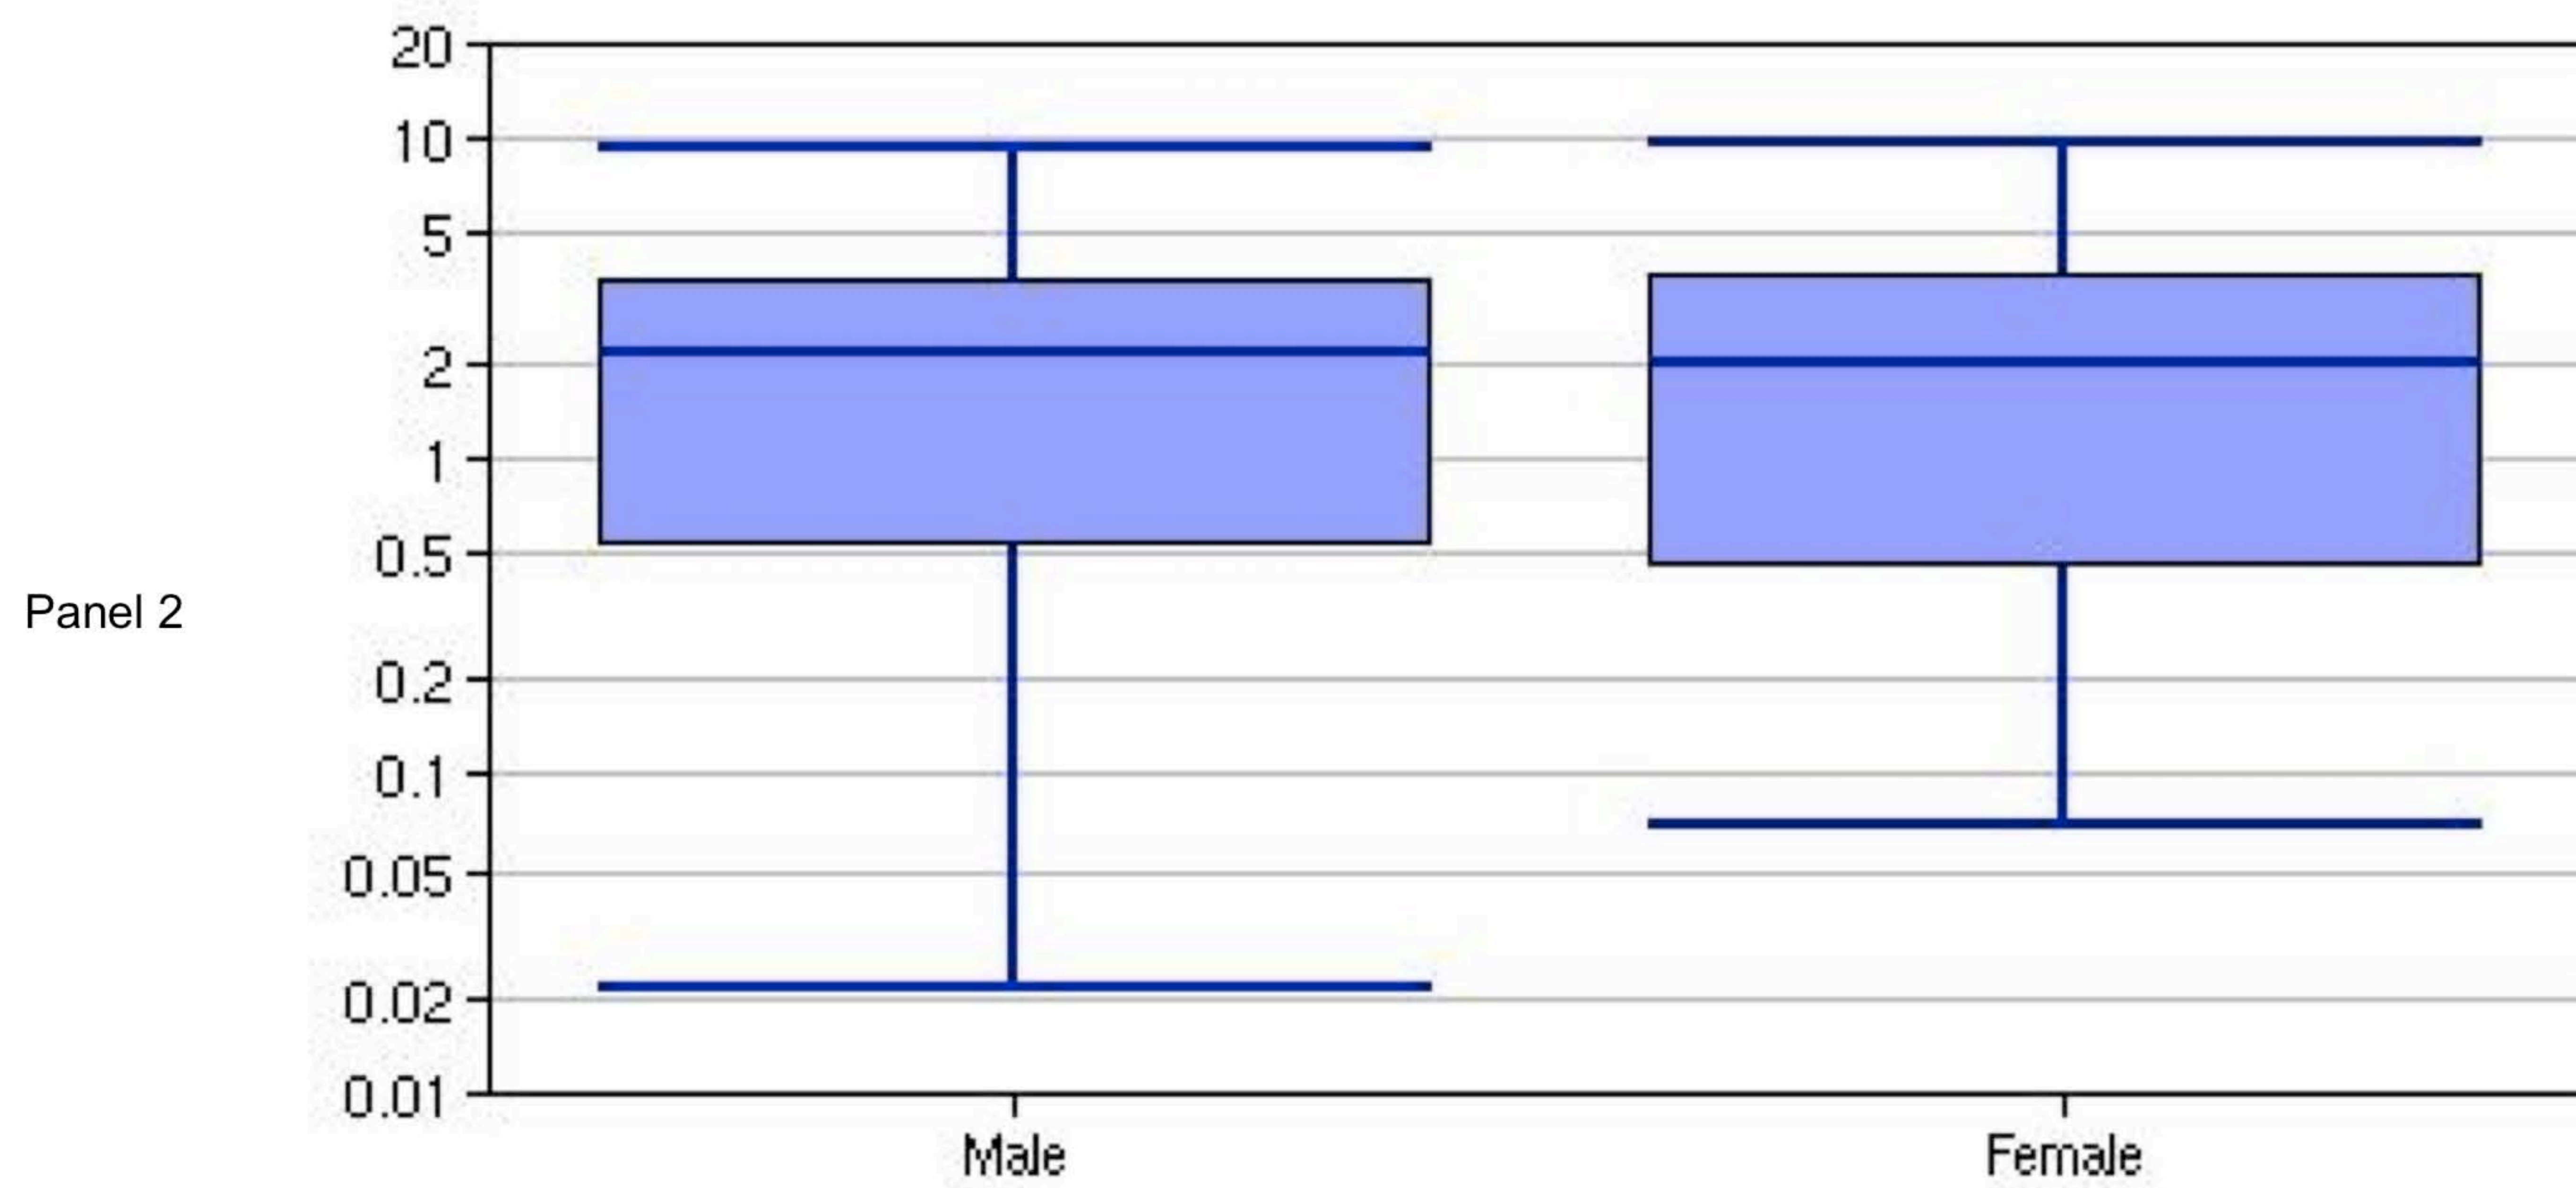

Supplement: NIHMS567198-supplement-Supp_Fig_S1-S5.pdf [file NIHMS567198-supplement-Supp_Fig_S1-S5.pdf]
