# Supplementary material
Source: PubMed Central journal article supplement (PMC3999266)
Supplement: NIHMS567198-supplement-Supp_Data_S1.pdf [file NIHMS567198-supplement-Supp_Data_S1.pdf]

**Supplementary Data 1 (Combined Panel 1 and Panel 2 miRNAs): Differential Pattern of Leukocyte, Erythrocyte and Plasma miRNA Expression**Condition 1 : **Leukocytes ΔCt**Condition 2 : **Erythrocytes ΔCt**Condition 3 : **Non-Pregnant ΔCt**Condition 4 : **Pregnant (Saline-Exposed) ΔCt**Condition 5 : **Neonatal Lamb (In utero Saline-Exposed) ΔCt**

Color Code

 25th percentile 50th percentile 75th percentileStatistics: **ANOVA**,  $p < 0.05$ Correction: **Benjamini and Hochberg**,  $\alpha = 0.05$ Data Transformation: **Treated as Log Transformed**

| ANOVA    | Benjamini and Hochberg Adj. p-value | Leukocytes mean 1 | Erythrocytes mean 2 | Non-pregnant Plasma mean 3 | Pregnant (Saline-exposed) Plasma mean 4 | Lamb (Saline-Exposed) Plasma mean 5 | Leukocytes SEM 1 | Erythrocytes SEM 2 | Non-pregnant Plasma SEM 3 | Pregnant (Saline-exposed) Plasma SEM 4 | Lamb (Saline-Exposed) Plasma SEM 5 | Gene Title #   |
|----------|-------------------------------------|-------------------|---------------------|----------------------------|-----------------------------------------|-------------------------------------|------------------|--------------------|---------------------------|----------------------------------------|------------------------------------|----------------|
| 0        | 0.00E+00                            | -12.1431          | -19.0425            | -2.12823                   | -2.63458                                | -2.25131                            | 0.136435         | 0.587635           | 4.82737                   | 1.19448                                | 1.37103                            | hsa-miR-103    |
| 0        | 0.00E+00                            | -11.0269          | -17.526             | -3.81461                   | -1.85854                                | -5.0227                             | 0.101383         | 0.321167           | 1.3593                    | 1.77344                                | 0.478535                           | hsa-miR-191    |
| 0        | 0.00E+00                            | -8.78626          | -17.5158            | -8.86598                   | -6.26423                                | -4.15594                            | 0.212523         | 0.553759           | 1.25222                   | 1.00145                                | 1.5563                             | hsa-miR-451    |
| 0.000095 | 4.82E-04                            | -9.11693          | -17.4341            | -9.62298                   | -9.46542                                | -13.1128                            | 0.115295         | 0.376494           | 1.2412                    | 0.601371                               | 1.9841                             | hsa-miR-320b   |
| 0.000001 | 7.77E-06                            | -3.69614          | -15.143             | -7.48608                   | -6.55621                                | -5.9818                             | 0.203731         | 0.395936           | 1.44356                   | 1.10418                                | 1.59063                            | hsa-miR-486-5p |
| 0        | 0.00E+00                            | -3.65952          | -14.7335            | 0.430358                   | -1.96243                                | 2.00976                             | 0.719301         | 0.697616           | 1.40333                   | 4.33527                                | 0.96752                            | hsa-miR-144*   |
| 0.000036 | 1.56E-04                            | -7.69853          | -14.2882            | -1.60018                   | -1.79221                                | -3.57752                            | 0.224792         | 1.47468            | 4.09018                   | 0.58614                                | 1.51537                            | hsa-miR-16     |
| 0        | 0.00E+00                            | -7.78278          | -14.2341            | -23.0952                   | -17.3817                                | -21.1212                            | 0.810068         | 0.418119           | 0.456695                  | 2.5608                                 | 0.885048                           | hsa-miR-188-3p |
| 0.000034 | 1.85E-04                            | -9.32506          | -14.1635            | -9.40947                   | -6.30864                                | -9.25771                            | 0.058279         | 0.583518           | 0.421567                  | 1.887                                  | 0.474826                           | hsa-miR-423-5p |
| 0        | 0.00E+00                            | -4.27044          | -13.9982            | 1.33658                    | 2.53928                                 | 2.11276                             | 0.167982         | 0.722953           | 2.42569                   | 2.35921                                | 2.16163                            | hsa-miR-505*   |
| 0        | 0.00E+00                            | -6.70712          | -13.1776            | 3.40821                    | 2.3929                                  | 1.23054                             | 0.130101         | 0.445568           | 0.674873                  | 0.913882                               | 1.05205                            | hsa-miR-554    |
| 0.000138 | 4.77E-04                            | -7.96234          | -13.0904            | -4.51372                   | 1.09072                                 | -2.29236                            | 0.140213         | 0.163357           | 1.63388                   | 4.53418                                | 1.36493                            | hsa-miR-93     |
| 0.000001 | 7.77E-06                            | -4.69876          | -12.798             | -3.79394                   | -2.27643                                | -0.849868                           | 0.252166         | 0.299713           | 1.77417                   | 1.56833                                | 1.5391                             | hsa-miR-185    |
| 0.000003 | 2.03E-05                            | -9.83893          | -12.5086            | -1.04181                   | -1.65293                                | -0.220264                           | 0.103349         | 0.326904           | 2.89584                   | 1.15507                                | 1.92366                            | hsa-miR-15a    |
| 0        | 0.00E+00                            | -7.06391          | -12.4688            | -3.08178                   | -0.215486                               | -0.460122                           | 0.168728         | 0.31819            | 1.08072                   | 1.38092                                | 0.831821                           | hsa-miR-25     |
| 0        | 0.00E+00                            | -7.06456          | -12.1183            | 0.549396                   | 2.94792                                 | -2.17411                            | 0.136856         | 0.394869           | 0.726536                  | 1.57523                                | 1.7467                             | hsa-miR-532-3p |
| 0        | 0.00E+00                            | -8.87942          | -12.0691            | -2.98044                   | -1.71098                                | -2.16171                            | 0.105961         | 0.369126           | 1.31001                   | 1.44264                                | 1.40755                            | hsa-miR-20a    |
| 0        | 0.00E+00                            | -8.35849          | -11.9975            | 2.15959                    | 0.428123                                | -0.285846                           | 0.132598         | 0.207788           | 2.47651                   | 0.715682                               | 0.987791                           | hsa-miR-103    |
| 0.000216 | 6.89E-04                            | -7.84411          | -11.994             | -2.9879                    | -3.39631                                | -2.91913                            | 0.263611         | 0.523104           | 2.29172                   | 1.51108                                | 1.88598                            | hsa-miR-92a    |
| 0        | 0.00E+00                            | -8.62278          | -11.7915            | -1.77646                   | 1.46271                                 | 0.696853                            | 0.103223         | 0.278939           | 1.06401                   | 1.52623                                | 2.02139                            | hsa-miR-106a   |
| 0.000388 | 1.59E-03                            | -4.18486          | -11.7373            | 0.041263                   | 5.43243                                 | -8.17803                            | 0.153057         | 0.599288           | 2.0983                    | 2.3707                                 | 3.77906                            | hsa-miR-103-2* |
| 0.000477 | 1.84E-03                            | -3.98639          | -11.5882            | 2.50186                    | -4.61383                                | 3.53505                             | 0.171663         | 0.537642           | 4.76276                   | 6.28375                                | 1.59336                            | hsa-miR-15b*   |
| 0.017539 | 3.49E-02                            | -6.54099          | -11.4622            | -8.46189                   | 0.948268                                | -0.715894                           | 0.084569         | 0.390489           | 6.06963                   | 0.94382                                | 2.66212                            | hsa-miR-106b*  |
| 0        | 0.00E+00                            | -6.5899           | -11.4445            | -1.18454                   | 0.242965                                | -1.0346                             | 0.105513         | 0.368502           | 0.407196                  | 1.67156                                | 0.711153                           | hsa-miR-130b*  |
| 0.000069 | 2.72E-04                            | -9.04333          | -11.081             | -3.92316                   | -1.97543                                | -4.58787                            | 0.146173         | 0.679932           | 2.30975                   | 1.87231                                | 0.896831                           | hsa-miR-19b    |
| 0        | 0.00E+00                            | -5.04145          | -11.0378            | 5.19507                    | 4.35844                                 | 2.21405                             | 0.138804         | 0.284041           | 0.676559                  | 1.78447                                | 0.977772                           | hsa-miR-548j   |
| 0        | 0.00E+00                            | -7.25979          | -10.9693            | 2.91954                    | 1.7363                                  | -1.33954                            | 0.071232         | 0.27396            | 1.15329                   | 0.434603                               | 1.30866                            | hsa-miR-15b    |
| 0.000003 | 2.03E-05                            | -7.59341          | -10.5922            | -0.846098                  | -0.711802                               | 1.92835                             | 0.070202         | 0.166108           | 1.05892                   | 2.19538                                | 1.94875                            | hsa-let-7g     |
| 0.000003 | 2.03E-05                            | -6.80677          | -10.5296            | 2.1004                     | -2.39547                                | -1.6872                             | 0.095075         | 0.446883           | 2.20749                   | 1.09677                                | 1.61393                            | hsa-let-7b     |
| 0.000001 | 7.77E-06                            | -6.93901          | -10.4257            | -0.982633                  | -0.136303                               | 0.92627                             | 0.112013         | 0.288391           | 1.57705                   | 1.77463                                | 1.62914                            | hsa-miR-191    |
| 0.009618 | 1.70E-02                            | -5.49947          | -10.2808            | -6.21603                   | -4.08965                                | -5.26465                            | 0.098993         | 0.508329           | 1.52122                   | 1.11654                                | 1.80165                            | hsa-miR-320a   |

|          |          |           |          |           |           |           |          |          |          |          |          |                 |
|----------|----------|-----------|----------|-----------|-----------|-----------|----------|----------|----------|----------|----------|-----------------|
| 0        | 0.00E+00 | -12.0993  | -10.1593 | -3.21919  | -1.39763  | -2.69971  | 0.181888 | 0.355599 | 1.52722  | 0.989577 | 1.20978  | hsa-miR-150     |
| 0.00002  | 1.19E-04 | -6.09593  | -10.1316 | -9.24164  | -4.31454  | -7.9471   | 0.170378 | 0.38833  | 0.752313 | 1.45535  | 0.60477  | hsa-miR-526b*   |
| 0        | 0.00E+00 | -4.45541  | -10.0792 | -5.54211  | -5.45688  | -5.3448   | 0.124158 | 0.27441  | 0.253059 | 0.216084 | 0.546689 | hsa-miR-331-5p  |
| 0.000002 | 1.46E-05 | -4.45625  | -10.067  | 1.88514   | -2.86694  | -1.00924  | 0.110453 | 0.592361 | 2.67906  | 0.804571 | 0.822966 | hsa-miR-144     |
| 0        | 0.00E+00 | -1.80052  | -9.94229 | -21.59    | -17.665   | -19.1891  | 0.93245  | 2.50639  | 0.417745 | 1.92945  | 0.760157 | hsa-miR-603     |
| 0.012259 | 2.10E-02 | -6.31753  | -9.89539 | -1.11843  | -2.51369  | 2.11463   | 0.313268 | 0.351133 | 1.77654  | 5.2211   | 2.60624  | hsa-miR-107     |
| 0.000001 | 7.77E-06 | -6.00129  | -9.77393 | -4.53086  | -1.45307  | -4.13371  | 0.076803 | 0.226311 | 1.01996  | 0.633018 | 1.05972  | hsa-miR-140-3p  |
| 0.013826 | 2.93E-02 | -3.66238  | -9.72266 | 2.95618   | -5.12725  | 2.6618    | 0.220965 | 2.56217  | 1.60197  | 6.08229  | 1.44673  | hsa-let-7g*     |
| 0.004948 | 1.24E-02 | 1.99811   | -9.69229 | 5.34838   | 2.73276   | 0.97339   | 0.464859 | 3.88999  | 1.90922  | 0.840626 | 3.11805  | hsa-miR-26a-1*  |
| 0.00296  | 8.50E-03 | -4.77461  | -9.67161 | -3.74168  | -16.7054  | 2.61734   | 0.175889 | 2.28371  | 3.5395   | 1.1486   | 3.80178  | hsa-let-7f-2*   |
| 0        | 0.00E+00 | -5.72275  | -9.4679  | 1.17915   | 0.941095  | 0.562595  | 0.216486 | 0.308793 | 1.28392  | 1.41172  | 0.760858 | hsa-let-7d      |
| 0        | 0.00E+00 | -6.02351  | -9.4542  | 3.60179   | -1.33859  | 4.25542   | 0.162772 | 0.580635 | 1.38193  | 2.25457  | 1.17972  | hsa-miR-223*    |
| 0.000001 | 7.77E-06 | -5.84395  | -9.42514 | -0.397916 | -1.82073  | -1.39102  | 0.299947 | 0.380649 | 0.913719 | 2.05261  | 0.781669 | hsa-let-7a      |
| 0        | 0.00E+00 | -6.63702  | -9.257   | -1.51713  | 2.31689   | -0.851294 | 0.082296 | 0.280475 | 0.99541  | 2.41085  | 0.789993 | hsa-miR-151-5p  |
| 0.000001 | 7.77E-06 | -6.80861  | -9.23092 | 3.15289   | 1.743     | -2.0842   | 0.23603  | 0.408879 | 2.00645  | 1.86273  | 1.3095   | hsa-let-7f      |
| 0        | 0.00E+00 | -8.39078  | -9.21848 | 2.90696   | 0.56866   | 2.84339   | 0.126806 | 0.309255 | 1.88626  | 2.63393  | 1.18239  | hsa-miR-30c     |
| 0        | 0.00E+00 | -7.92614  | -9.07011 | 4.93931   | 0.003869  | -0.338989 | 0.091029 | 0.451529 | 0.966254 | 0.468202 | 0.914555 | hsa-miR-30b     |
| 0.000154 | 7.16E-04 | -6.7525   | -8.9872  | 1.48466   | 6.09165   | 2.828     | 0.131445 | 1.07517  | 8.10983  | 3.94083  | 0.554313 | hsa-miR-20a*    |
| 0.000007 | 3.90E-05 | -3.96783  | -8.90561 | -5.18261  | -2.94743  | -3.60636  | 0.075537 | 0.226835 | 1.19543  | 1.10552  | 0.627469 | hsa-miR-484     |
| 0        | 0.00E+00 | -6.52831  | -8.85598 | -1.85372  | 3.18684   | 4.66962   | 0.163027 | 0.470609 | 0.39555  | 1.0789   | 1.80271  | hsa-miR-330-5p  |
| 0.000004 | 2.81E-05 | -4.22195  | -8.81056 | 3.85762   | -3.61398  | -0.168301 | 0.204107 | 0.153408 | 1.43539  | 2.95804  | 0.782623 | hsa-miR-769-5p  |
| 0        | 0.00E+00 | -8.29093  | -8.74558 | -2.74225  | -0.877141 | -2.25213  | 0.169625 | 0.228261 | 1.22614  | 1.14204  | 0.77477  | hsa-miR-181a    |
| 0.000083 | 3.10E-04 | -9.73352  | -8.65548 | -4.82109  | -3.65106  | -0.22975  | 0.120576 | 0.336123 | 2.86709  | 0.922655 | 1.45402  | hsa-miR-223     |
| 0.000023 | 1.06E-04 | -6.25621  | -8.63896 | 0.861308  | 1.15897   | 3.96586   | 0.086228 | 0.244042 | 2.33512  | 1.71059  | 2.40685  | hsa-miR-186     |
| 0        | 0.00E+00 | -2.12349  | -8.50241 | 5.08365   | 3.48346   | -3.12145  | 0.239071 | 0.450458 | 1.18179  | 1.37505  | 1.30804  | hsa-miR-25*     |
| 0.000005 | 3.01E-05 | -5.89486  | -8.46496 | -1.67305  | 1.33428   | 0.13118   | 0.642304 | 0.405244 | 1.89712  | 1.26804  | 1.21201  | hsa-miR-26a     |
| 0.000347 | 1.46E-03 | -0.80836  | -8.41405 | -15.504   | 5.25102   | 2.06108   | 0.250741 | 2.23793  | 7.5189   | 3.75414  | 1.58538  | hsa-miR-502-3p  |
| 0.010066 | 1.75E-02 | -9.18871  | -8.32502 | -3.06233  | -6.12689  | -2.54307  | 0.153067 | 0.48123  | 2.06101  | 3.55842  | 0.997935 | hsa-miR-21      |
| 0.000043 | 1.82E-04 | -5.52528  | -8.30337 | 5.74736   | 3.3945    | 6.04239   | 0.140391 | 0.172513 | 3.11413  | 3.63969  | 2.42696  | hsa-miR-425     |
| 0.000004 | 2.53E-05 | -5.07143  | -8.28896 | -0.46258  | 1.44467   | 1.0343    | 0.302305 | 0.248068 | 2.72895  | 0.733966 | 0.973931 | hsa-miR-222     |
| 0.003321 | 9.37E-03 | -6.4187   | -8.13653 | -2.55035  | -1.42144  | -6.56072  | 0.149174 | 0.709861 | 2.28804  | 2.2881   | 0.423158 | hsa-miR-1249    |
| 0.000065 | 2.61E-04 | -3.98959  | -8.06188 | 0.80327   | 1.50105   | 0.534028  | 0.125879 | 0.500202 | 2.4025   | 1.98127  | 1.30407  | hsa-miR-125b    |
| 0        | 0.00E+00 | -2.39372  | -7.89034 | 6.88561   | 3.22508   | 4.25444   | 0.204845 | 0.804465 | 0.886701 | 2.83308  | 1.13576  | hsa-miR-148b*   |
| 0.007027 | 1.67E-02 | -3.89073  | -7.71954 | -6.21793  | 4.23411   | 5.81134   | 0.19192  | 0.826377 | 9.68508  | 2.44216  | 1.64595  | hsa-miR-340*    |
| 0.000011 | 5.78E-05 | -5.12309  | -7.60723 | -0.778933 | 1.74342   | 0.878882  | 0.11199  | 0.374495 | 1.51187  | 1.28556  | 1.63602  | hsa-miR-197     |
| 0.02037  | 3.23E-02 | -5.48907  | -7.58307 | 1.56947   | -4.58052  | -3.30463  | 0.148884 | 0.168995 | 2.56028  | 3.76953  | 1.41372  | hsa-miR-221     |
| 0.000002 | 1.46E-05 | -7.26164  | -7.56209 | -1.80371  | -0.81383  | 1.74168   | 0.094276 | 0.183463 | 1.34742  | 1.46937  | 1.549    | hsa-miR-23b     |
| 0.000568 | 2.14E-03 | -0.607478 | -7.49042 | 0.487328  | -2.01249  | 7.62938   | 0.353631 | 0.348013 | 4.99702  | 1.18551  | 0.718112 | hsa-miR-193b*   |
| 0.01857  | 3.67E-02 | -2.23933  | -7.45401 | -3.21712  | -8.96117  | -2.56952  | 0.441963 | 1.54845  | 1.14101  | 3.29425  | 1.1899   | hsa-miR-33b*    |
| 0        | 0.00E+00 | -0.782972 | -7.432   | 3.23505   | 2.29101   | 0.377416  | 0.131782 | 0.570617 | 1.32213  | 0.717704 | 1.26902  | hsa-miR-125b-2* |
| 0.000622 | 1.73E-03 | -7.78917  | -7.34501 | -4.42154  | -2.98368  | -3.37241  | 0.072335 | 0.180943 | 1.47541  | 0.935585 | 1.12404  | hsa-miR-24      |
| 0        | 0.00E+00 | -4.79375  | -7.28245 | 8.80314   | 2.00289   | 3.97942   | 0.124097 | 0.931411 | 0.79453  | 2.43168  | 0.907375 | hsa-miR-15a*    |
| 0        | 0.00E+00 | -3.55865  | -7.25626 | 5.51049   | 5.73007   | 6.38779   | 0.21946  | 0.39985  | 3.65542  | 1.53984  | 0.671444 | hsa-miR-191*    |
| 0        | 0.00E+00 | -3.40798  | -7.18081 | 0.101505  | 1.30248   | 1.0513    | 0.252715 | 0.514737 | 1.10512  | 1.15105  | 0.957573 | hsa-let-7c      |
| 0.000909 | 3.12E-03 | -0.889505 | -7.13793 | 1.60636   | -1.64949  | 0.209888  | 0.141311 | 0.643613 | 2.37192  | 1.60331  | 1.68122  | hsa-miR-196b*   |
| 0.000055 | 2.95E-04 | -4.30028  | -6.89559 | 4.74715   | 2.39978   | 1.39572   | 0.318476 | 0.730151 | 2.74666  | 0.54931  | 1.90295  | hsa-let-7b*     |
| 0        | 0.00E+00 | -4.14299  | -6.85976 | 0.7311    | 2.52491   | 0.59821   | 0.164227 | 0.546656 | 1.29442  | 0.906478 | 0.6943   | hsa-miR-106b    |

|          |          |           |          |           |           |           |          |          |          |          |          |                 |
|----------|----------|-----------|----------|-----------|-----------|-----------|----------|----------|----------|----------|----------|-----------------|
| 0.000024 | 1.38E-04 | 1.88953   | -6.81108 | 2.25813   | 5.95548   | -1.25794  | 0.561749 | 0.351525 | 0.301316 | 4.53429  | 0.680898 | hsa-miR-493*    |
| 0        | 0.00E+00 | -3.50295  | -6.79333 | 1.63451   | 0.149081  | -0.590577 | 0.172934 | 0.411892 | 1.4046   | 0.918276 | 0.481449 | hsa-miR-18a     |
| 0.010058 | 1.75E-02 | -7.97069  | -6.76154 | -16.5497  | -8.34995  | -5.80322  | 0.883742 | 0.492207 | 1.6505   | 3.63042  | 2.35688  | hsa-miR-331-3p  |
| 0.002823 | 8.34E-03 | -10.3043  | -6.75477 | -0.85851  | -5.29171  | -2.08993  | 0.23397  | 1.4699   | 1.73062  | 1.52965  | 2.22229  | hsa-miR-513c    |
| 0.030532 | 4.63E-02 | -3.89036  | -6.71531 | -7.83547  | -8.84709  | -1.71429  | 0.201057 | 0.340748 | 2.29573  | 1.48112  | 2.35498  | hsa-miR-17      |
| 0.000012 | 6.22E-05 | -0.722868 | -6.7055  | 0.608573  | 1.47362   | 1.19598   | 0.1542   | 0.643807 | 1.37895  | 1.51265  | 1.08956  | hsa-miR-483-3p  |
| 0        | 0.00E+00 | -0.356245 | -6.65149 | -6.75839  | -4.40855  | -6.26969  | 0.316623 | 0.643717 | 0.607916 | 0.576565 | 0.585078 | hsa-miR-485-3p  |
| 0        | 0.00E+00 | -5.13339  | -6.6227  | 4.92447   | 7.74503   | 2.5654    | 0.088245 | 0.905057 | 0.63413  | 2.54343  | 0.826019 | hsa-let-7f-1*   |
| 0        | 0.00E+00 | -5.02901  | -6.57677 | 5.55777   | 4.85094   | 4.03595   | 0.122959 | 0.403999 | 0.51939  | 2.39226  | 1.22464  | hsa-miR-374b    |
| 0.000001 | 8.32E-06 | -5.37993  | -6.54608 | 2.77944   | 2.88734   | -0.17864  | 0.292692 | 0.63457  | 1.55969  | 1.66945  | 1.00374  | hsa-let-7i*     |
| 0.000093 | 3.40E-04 | -5.28241  | -6.49783 | 2.338     | 4.98942   | 3.23383   | 0.141397 | 0.373667 | 1.96331  | 3.63506  | 1.58521  | hsa-miR-148b    |
| 0.000018 | 1.12E-04 | -7.00837  | -6.33383 | 6.53703   | 2.96224   | 4.76932   | 0.203024 | 0.907911 | 2.2193   | 4.00904  | 1.00636  | hsa-miR-29a*    |
| 0        | 0.00E+00 | -3.82299  | -6.38017 | 0.247472  | 2.16446   | 2.01878   | 0.10905  | 0.428964 | 1.69546  | 0.320678 | 0.950358 | hsa-miR-302a    |
| 0.016846 | 2.76E-02 | -2.23813  | -6.36123 | 7.86001   | 6.57058   | -0.942623 | 0.183713 | 0.371986 | 3.37762  | 2.24377  | 4.43635  | hsa-miR-196b    |
| 0        | 0.00E+00 | -5.93826  | -6.25813 | -0.413742 | 1.04117   | 1.42761   | 0.073203 | 0.214221 | 0.294636 | 1.10746  | 1.01212  | hsa-miR-22      |
| 0.000022 | 1.29E-04 | -3.81221  | -6.22149 | 6.92134   | 3.18914   | 0.85026   | 0.196653 | 1.06896  | 1.35101  | 2.74181  | 1.76181  | hsa-let-7a*     |
| 0        | 0.00E+00 | 0.720081  | -6.21122 | -8.68229  | -8.82824  | -7.40802  | 0.145704 | 0.362434 | 1.07249  | 1.11354  | 0.626618 | hsa-miR-543     |
| 0.000357 | 1.07E-03 | -4.87949  | -6.17167 | -1.62048  | -1.41296  | -2.83593  | 0.082733 | 0.560552 | 1.02866  | 0.796887 | 0.924361 | hsa-let-7d*     |
| 0.000018 | 8.61E-05 | -3.14216  | -6.17037 | 6.70127   | 6.22924   | 3.68041   | 0.181331 | 0.339694 | 5.16386  | 0.979982 | 1.17363  | hsa-miR-151-3p  |
| 0        | 0.00E+00 | -2.8236   | -6.07513 | 3.58231   | 2.524     | 0.680349  | 0.149867 | 0.200801 | 0.567576 | 1.16696  | 1.15141  | hsa-miR-526b    |
| 0.00462  | 1.18E-02 | -5.11089  | -6.06225 | 5.78299   | 5.72273   | -0.507662 | 0.103499 | 0.598204 | 2.11176  | 2.82476  | 3.40842  | hsa-miR-26b*    |
| 0.000001 | 8.32E-06 | -2.80662  | -5.96357 | 6.36663   | 6.91554   | 3.35655   | 0.18019  | 0.496407 | 2.2612   | 1.89163  | 1.54252  | hsa-miR-181a-2* |
| 0.004325 | 8.63E-03 | -4.12108  | -5.93091 | 1.91722   | -0.2887   | 3.23981   | 0.206305 | 0.262572 | 3.80001  | 1.54591  | 2.16341  | hsa-miR-192     |
| 0        | 0.00E+00 | -2.53247  | -5.86148 | 2.62299   | 4.58817   | 3.07432   | 0.067262 | 0.901181 | 0.844498 | 1.81367  | 0.854841 | hsa-miR-192*    |
| 0.006121 | 1.47E-02 | -1.24306  | -5.73021 | 4.20344   | -0.927794 | 0.343971  | 0.124365 | 1.15108  | 2.54344  | 3.16383  | 0.971718 | hsa-miR-101*    |
| 0.000095 | 4.82E-04 | -1.75882  | -5.69189 | 6.51217   | 7.44063   | 2.31333   | 0.126513 | 0.283798 | 1.32266  | 1.04588  | 2.48454  | hsa-miR-342-5p  |
| 0.000015 | 7.46E-05 | -8.02557  | -5.67651 | -2.46231  | -0.6765   | 0.168551  | 0.078277 | 0.096703 | 1.28488  | 1.37235  | 1.45004  | hsa-miR-23a     |
| 0.000062 | 2.51E-04 | -3.7959   | -5.55051 | 2.03878   | 1.85724   | 1.13214   | 0.113516 | 0.991528 | 0.636116 | 1.70171  | 1.39962  | hsa-miR-141     |
| 0.000016 | 7.85E-05 | -4.91555  | -5.42332 | 3.26662   | 1.31172   | 0.45541   | 0.240245 | 0.49531  | 3.01051  | 1.7936   | 0.548467 | hsa-miR-26b     |
| 0.000145 | 4.92E-04 | -6.19142  | -5.31165 | -2.71081  | -0.799733 | -0.592561 | 0.170776 | 0.219292 | 1.43518  | 1.32308  | 1.02468  | hsa-miR-27a     |
| 0.000002 | 1.47E-05 | -0.681922 | -5.2693  | -6.20778  | -4.42126  | -4.04422  | 0.405291 | 0.503803 | 0.621537 | 0.562512 | 0.533241 | hsa-miR-877*    |
| 0.001437 | 3.47E-03 | -5.90913  | -5.23482 | -3.11756  | -0.495317 | -1.88777  | 0.226376 | 0.4509   | 0.98317  | 1.22041  | 1.26084  | hsa-miR-27b     |
| 0.000227 | 1.02E-03 | -4.51748  | -5.2319  | 4.48496   | 7.73492   | 0.450879  | 0.101271 | 0.762465 | 1.12851  | 1.51452  | 3.02473  | hsa-miR-30d*    |
| 0.022951 | 3.60E-02 | -4.46324  | -5.17943 | -0.846518 | -3.44059  | -2.42674  | 0.14672  | 0.278243 | 2.2091   | 0.4139   | 0.842704 | hsa-miR-128     |
| 0        | 0.00E+00 | -2.49085  | -5.10029 | 6.50471   | 7.2952    | 3.07912   | 0.153029 | 0.469334 | 1.62784  | 1.44333  | 1.2233   | hsa-miR-194     |
| 0.001021 | 2.63E-03 | -3.25687  | -5.09767 | -1.37349  | -0.347647 | 1.36474   | 0.128826 | 0.841346 | 1.42765  | 1.33008  | 1.21306  | hsa-miR-19a     |
| 0.001181 | 2.96E-03 | -4.64396  | -5.07524 | -1.97639  | -1.48643  | 1.20916   | 1.53975  | 0.287314 | 0.897267 | 1.01499  | 0.915719 | hsa-miR-215     |
| 0.014909 | 3.08E-02 | -5.35263  | -5.01943 | 0.761993  | -9.02705  | -1.84006  | 0.731203 | 0.876698 | 3.15304  | 1.88375  | 2.08359  | hsa-miR-636     |
| 0.000001 | 7.77E-06 | -5.96889  | -4.81137 | 4.18452   | 4.0762    | 5.45383   | 0.159056 | 0.578129 | 2.55074  | 1.24051  | 1.48586  | hsa-miR-155     |
| 0.007352 | 1.72E-02 | -4.82065  | -4.76107 | -2.07573  | -0.60324  | 0.418741  | 0.190866 | 0.658465 | 2.42528  | 1.26016  | 1.16995  | hsa-miR-33a*    |
| 0.000008 | 4.32E-05 | -2.5899   | -4.73307 | 0.63801   | 6.08716   | 5.84388   | 0.129116 | 0.143521 | 1.84072  | 2.22356  | 1.72803  | hsa-miR-425*    |
| 0.025713 | 4.87E-02 | -5.46239  | -4.69177 | -1.96377  | -4.42886  | -6.40888  | 0.141135 | 0.254959 | 1.96337  | 1.3124   | 0.573858 | hsa-miR-638     |
| 0        | 0.00E+00 | -4.26811  | -4.65643 | 5.83782   | 2.9293    | 2.35075   | 0.20727  | 0.273855 | 1.62852  | 2.45358  | 0.737298 | hsa-miR-421     |
| 0.030332 | 4.63E-02 | -2.7027   | -4.37297 | 1.44109   | 2.99611   | 1.47083   | 0.114103 | 0.235221 | 2.81332  | 2.55932  | 2.25605  | hsa-miR-193b    |
| 0.004717 | 9.26E-03 | -2.52743  | -4.35056 | 5.40513   | 0.546     | 4.82948   | 0.177468 | 0.112469 | 5.22841  | 1.82169  | 2.17011  | hsa-miR-532-5P  |
| 0.000018 | 8.61E-05 | 2.2677    | -4.31983 | 5.75818   | 4.26981   | 2.29276   | 0.138252 | 0.39684  | 2.16458  | 1.90355  | 1.19693  | hsa-miR-127-3p  |
| 0.000002 | 1.47E-05 | -2.96168  | -4.27468 | 0.554932  | 2.13153   | -0.252144 | 0.125205 | 0.723134 | 0.429739 | 1.05392  | 0.594572 | hsa-miR-24-1*   |

|          |          |           |          |           |           |           |          |          |          |          |          |                   |
|----------|----------|-----------|----------|-----------|-----------|-----------|----------|----------|----------|----------|----------|-------------------|
| 0.009764 | 1.72E-02 | -1.88995  | -4.26988 | 2.92117   | 3.88048   | 3.53742   | 0.071094 | 0.353438 | 6.82452  | 2.62871  | 2.0278   | hsa-miR-98        |
| 0.000863 | 3.03E-03 | -2.75075  | -4.23592 | -0.294943 | 3.15335   | 0.83537   | 0.154125 | 0.255756 | 1.76971  | 2.3588   | 0.814975 | hsa-miR-593       |
| 0.002957 | 8.50E-03 | -2.7727   | -4.07953 | -4.39906  | 0.071041  | -2.27529  | 0.144379 | 0.519589 | 0.978003 | 1.06025  | 0.751395 | hsa-miR-30a*      |
| 0.008437 | 1.51E-02 | -0.992027 | -4.07113 | -0.767764 | 0.647536  | 0.264602  | 0.246749 | 0.255933 | 1.59504  | 0.991548 | 1.19314  | hsa-miR-595       |
| 0.001034 | 3.44E-03 | 2.26099   | -4.062   | -0.10417  | 6.24072   | 4.46828   | 0.377579 | 0.143924 | 2.87904  | 5.60128  | 1.7016   | hsa-miR-219-1-3p  |
| 0.000119 | 4.23E-04 | 3.33358   | -4.04884 | -6.31435  | -7.82976  | -3.95755  | 0.896621 | 0.717394 | 1.53589  | 2.16132  | 1.66232  | hsa-miR-570       |
| 0.000723 | 1.95E-03 | -0.672513 | -4.04298 | 8.08736   | 0.057835  | 3.85138   | 0.18743  | 0.445608 | 3.63961  | 3.1768   | 1.14253  | hsa-miR-7         |
| 0.024301 | 3.78E-02 | -2.11167  | -4.01373 | -11.5206  | -13.303   | -7.2592   | 1.231    | 1.32296  | 4.60706  | 2.34427  | 2.81408  | hsa-miR-99a*      |
| 0.010061 | 1.75E-02 | 0.980874  | -4.00487 | 1.2503    | -0.117415 | 0.501745  | 0.351091 | 0.404211 | 1.05325  | 1.84345  | 1.46365  | hsa-miR-376c      |
| 0.000239 | 1.06E-03 | -3.57723  | -3.98276 | 5.69783   | 1.88221   | 3.53386   | 0.214935 | 0.702894 | 1.24865  | 2.16435  | 2.05691  | hsa-miR-664       |
| 0.015936 | 2.65E-02 | -0.350661 | -3.92959 | 0.065953  | 0.835241  | -1.35491  | 0.108746 | 0.609543 | 1.75741  | 0.77096  | 1.17232  | hsa-miR-760       |
| 0.007247 | 1.71E-02 | 1.62279   | -3.88424 | -0.336782 | -0.851495 | 1.39487   | 0.553176 | 0.415396 | 1.83081  | 0.556086 | 1.48916  | hsa-let-7c*       |
| 0.01699  | 2.76E-02 | -2.06329  | -3.84953 | -3.95327  | -0.585875 | -1.64831  | 0.254561 | 0.766884 | 0.60565  | 0.726587 | 0.885922 | hsa-miR-301a      |
| 0.002615 | 7.87E-03 | -4.66361  | -3.83105 | 3.02779   | -0.067873 | -1.82508  | 0.162729 | 0.869852 | 2.17443  | 1.71978  | 1.23703  | hsa-miR-24-2*     |
| 0.000006 | 4.12E-05 | -5.75009  | -3.81106 | -1.00763  | 4.42552   | 5.72258   | 0.131016 | 0.542323 | 2.32201  | 1.77736  | 1.91217  | hsa-miR-29c*      |
| 0.027037 | 4.91E-02 | -0.449376 | -3.78338 | 2.68194   | 2.14003   | 2.38206   | 0.267973 | 0.649247 | 4.01896  | 1.24061  | 2.18982  | hsa-miR-379*      |
| 0.000082 | 3.09E-04 | -4.4455   | -3.75628 | -2.84053  | 6.03843   | 1.36179   | 0.096485 | 0.273444 | 0.57056  | 2.52662  | 1.55296  | hsa-miR-365       |
| 0.000002 | 1.47E-05 | -4.51932  | -3.74206 | 3.36483   | 1.96352   | -1.33053  | 0.153343 | 0.487234 | 1.32538  | 1.57361  | 0.591842 | hsa-miR-1538      |
| 0.012451 | 2.12E-02 | -1.94776  | -3.7301  | 4.39446   | 3.07917   | 4.39406   | 0.076452 | 0.232596 | 2.80133  | 4.50933  | 1.44702  | hsa-miR-500       |
| 0.004382 | 1.14E-02 | -2.26527  | -3.72634 | -6.19179  | -6.11533  | -6.02857  | 0.411146 | 0.940708 | 1.31139  | 0.671958 | 0.613083 | hsa-miRPlus-A1031 |
| 0.000648 | 1.76E-03 | -2.35271  | -3.70372 | -12.7802  | -8.19204  | -6.18465  | 0.077305 | 0.362917 | 2.95329  | 1.83552  | 1.5284   | hsa-miR-324-3p    |
| 0.000041 | 1.76E-04 | 5.01462   | -3.68927 | 4.76973   | 4.39626   | -0.611181 | 0.923356 | 0.447086 | 1.54453  | 1.85485  | 1.21372  | hsa-miR-187       |
| 0        | 0.00E+00 | -0.362238 | -3.68255 | 1.93904   | 3.95457   | -0.237303 | 0.0827   | 0.40967  | 1.41621  | 0.739689 | 0.162903 | hsa-miR-153       |
| 0.030499 | 4.63E-02 | -4.67143  | -3.63676 | 1.36073   | 3.09845   | 2.93984   | 2.87801  | 0.287474 | 2.29031  | 1.99667  | 1.97481  | hsa-miR-29a       |
| 0.011997 | 2.61E-02 | -4.72696  | -3.59633 | 0.993422  | 0.083227  | 0.718555  | 0.212159 | 0.674915 | 2.06373  | 2.71585  | 1.11567  | hsa-miR-411*      |
| 0.001877 | 4.30E-03 | 0.479464  | -3.5621  | 5.81928   | 6.18469   | 0.733871  | 0.15844  | 0.122427 | 5.43091  | 1.80529  | 0.883748 | hsa-miR-628-3p    |
| 0.000024 | 1.09E-04 | -6.48173  | -3.5294  | 4.12874   | 2.73358   | 3.90249   | 0.074997 | 0.572208 | 2.67957  | 1.60678  | 1.72689  | hsa-miR-29b       |
| 0.014915 | 3.08E-02 | 0.283321  | -3.48945 | 3.16945   | -0.785568 | 1.14712   | 0.264132 | 0.461048 | 1.15546  | 1.70729  | 1.71776  | hsa-miR-630       |
| 0.001537 | 4.96E-03 | 1.12469   | -3.44013 | 6.54186   | 1.90826   | 3.55245   | 0.340329 | 1.1954   | 0.845748 | 2.98017  | 1.44877  | hsa-miR-16-2*     |
| 0.000001 | 7.77E-06 | -2.53276  | -3.422   | 6.70528   | 3.65166   | 3.07544   | 0.218909 | 0.282246 | 1.80597  | 1.44549  | 1.12308  | hsa-miR-132       |
| 0.002435 | 5.31E-03 | -2.01002  | -3.39694 | -9.12691  | -7.28135  | -5.50048  | 0.087107 | 0.29899  | 1.53505  | 1.25802  | 1.75125  | hsa-miR-346       |
| 0.000613 | 2.25E-03 | -2.81838  | -3.38819 | 3.56393   | 4.20187   | -1.58187  | 0.257878 | 0.389647 | 3.38163  | 1.17418  | 1.4626   | hsa-miR-1468      |
| 0.000102 | 4.96E-04 | -4.76277  | -3.38572 | 7.51917   | 3.57157   | 5.24272   | 1.65138  | 0.383017 | 1.33024  | 3.59295  | 1.52796  | hsa-miR-455-3p    |
| 0        | 0.00E+00 | -8.45119  | -3.35487 | 1.01712   | 2.89593   | 4.0436    | 0.085936 | 0.723954 | 1.46057  | 1.55308  | 0.649391 | hsa-miR-142-5p    |
| 0        | 0.00E+00 | -0.944266 | -3.33825 | 10.2408   | 3.82831   | 2.96969   | 0.183407 | 0.320576 | 1.57317  | 1.46914  | 1.23169  | hsa-miR-373       |
| 0.00311  | 6.52E-03 | -3.94592  | -3.3348  | -0.060995 | -0.581536 | 0.371813  | 0.146644 | 0.363581 | 1.44228  | 0.949403 | 1.17985  | hsa-miR-608       |
| 0        | 0.00E+00 | -3.69478  | -3.33297 | 6.13934   | 6.48736   | 3.17284   | 0.205418 | 1.01162  | 1.36191  | 1.32413  | 0.814702 | hsa-miR-374a      |
| 0.000192 | 6.35E-04 | -7.83165  | -3.24345 | 1.12132   | 1.63608   | 2.03699   | 0.072014 | 0.520225 | 2.69258  | 2.48251  | 1.41716  | hsa-miR-29c       |
| 0.000253 | 8.00E-04 | -0.005257 | -3.22308 | -1.55373  | 0.45996   | 0.182463  | 0.148494 | 0.298334 | 0.968559 | 0.948326 | 0.467558 | hsa-miR-584       |
| 0.008257 | 1.49E-02 | 2.3507    | -3.20873 | 2.95345   | -3.18034  | 1.05322   | 0.406662 | 0.577603 | 1.64394  | 3.22626  | 0.934977 | hsa-miR-199b-5p   |
| 0.014673 | 2.47E-02 | -0.553095 | -3.19482 | -6.59013  | -3.21719  | -4.37458  | 0.184503 | 0.571106 | 0.611332 | 1.49277  | 1.68713  | hsa-miR-455-5p    |
| 0.002024 | 4.55E-03 | -2.99938  | -3.1702  | 1.71725   | 1.01329   | 0.398923  | 0.119728 | 0.276148 | 2.35009  | 0.659006 | 0.817407 | hsa-miR-330-3p    |
| 0.000052 | 2.18E-04 | -3.42741  | -3.04675 | 3.21147   | 3.83419   | -0.403617 | 0.105447 | 0.080043 | 1.56201  | 2.12264  | 0.818235 | hsa-miR-28-5p     |
| 0.026667 | 4.91E-02 | -3.03716  | -2.88176 | 3.84065   | 0.242903  | 0.049685  | 0.213222 | 0.2952   | 1.73918  | 3.29645  | 1.92668  | hsa-miR-671-3p    |
| 0.00007  | 2.72E-04 | -0.105991 | -2.8707  | 9.80523   | 3.0082    | 1.71403   | 0.350195 | 0.186726 | 1.82756  | 3.18366  | 1.11481  | hsa-miR-371-5p    |
| 0.001805 | 4.18E-03 | -3.42988  | -2.83442 | 0.886012  | 0.131526  | 0.521644  | 0.184911 | 0.389714 | 1.08109  | 0.947412 | 1.20866  | hsa-miR-30e*      |
| 0.00007  | 2.72E-04 | -0.98002  | -2.63287 | 6.63931   | 1.988     | 1.7839    | 0.595516 | 0.818474 | 1.45853  | 0.922023 | 1.29368  | hsa-miR-154       |



|          |          |           |           |           |           |           |          |          |          |          |          |                 |
|----------|----------|-----------|-----------|-----------|-----------|-----------|----------|----------|----------|----------|----------|-----------------|
| 0.003302 | 6.80E-03 | 2.0039    | -2.60979  | 2.99004   | 1.93512   | 2.50434   | 0.264023 | 0.428838 | 2.42866  | 0.664392 | 0.936167 | hsa-miR-376a    |
| 0.002114 | 4.69E-03 | -5.04732  | -2.57552  | -0.327962 | -0.520285 | -0.365307 | 0.170959 | 0.327652 | 1.75324  | 1.38676  | 0.757322 | hsa-miR-342-3p  |
| 0.000096 | 4.82E-04 | 2.82246   | -2.55965  | 5.58414   | 3.16433   | 4.76589   | 0.58788  | 0.451204 | 2.81014  | 1.29951  | 0.689039 | hsa-miR-520g    |
| 0.015654 | 3.17E-02 | 5.57986   | -2.54698  | 7.07037   | 2.32111   | 3.52366   | 0.667416 | 0.613031 | 0.420938 | 2.04641  | 3.16858  | hsa-miR-409-5p  |
| 0.000602 | 2.24E-03 | -0.015796 | -2.54229  | 0.10044   | -7.59977  | -5.66681  | 0.329768 | 1.16682  | 3.12275  | 1.19557  | 0.71836  | hsa-miR-646     |
| 0.000028 | 1.58E-04 | -0.626463 | -2.51476  | -5.70034  | -7.02878  | -6.89707  | 0.250262 | 1.19472  | 0.720479 | 1.01611  | 0.567507 | hsa-miR-611     |
| 0.000193 | 6.35E-04 | -1.12452  | -2.47299  | 10.5616   | 5.30287   | 6.34406   | 0.116881 | 0.388024 | 0.599754 | 2.8294   | 2.47968  | hsa-miR-130b    |
| 0.002556 | 7.77E-03 | -2.84092  | -2.4475   | 1.78987   | -3.5738   | -3.53771  | 0.402214 | 0.792918 | 1.29179  | 1.12666  | 0.782113 | hsa-miR-552     |
| 0.000285 | 1.23E-03 | -0.078465 | -2.31023  | 6.97703   | 5.44047   | -0.343363 | 0.315268 | 0.715212 | 1.05854  | 2.59822  | 1.24919  | hsa-miR-548a-5p |
| 0.002986 | 6.29E-03 | 1.36687   | -2.26767  | -9.16451  | -2.15269  | -3.98806  | 0.325998 | 0.544879 | 2.01057  | 2.22591  | 2.14372  | hsa-miR-335     |
| 0.000036 | 1.56E-04 | -6.21096  | -2.22458  | 1.62519   | 5.96828   | 6.5263    | 0.142564 | 0.698636 | 6.30736  | 1.50348  | 2.04047  | hsa-miR-32      |
| 0.002133 | 4.71E-03 | 5.88585   | -2.14243  | 6.54251   | 3.04527   | 4.50382   | 1.38227  | 0.424527 | 2.36004  | 1.14074  | 1.71623  | hsa-miR-411     |
| 0.007842 | 1.80E-02 | -1.02771  | -2.12723  | -0.038381 | -3.96606  | -4.91526  | 0.251475 | 1.34303  | 0.743768 | 1.11565  | 0.713455 | hsa-miR-1914    |
| 0.000055 | 2.28E-04 | -0.461153 | -2.09595  | -14.8331  | -13.5932  | -10.1822  | 1.07389  | 1.24575  | 3.45854  | 2.89474  | 1.74906  | hsa-miR-134     |
| 0.000408 | 1.19E-03 | 6.02464   | -2.08515  | 6.57366   | 5.46516   | 4.16132   | 1.06447  | 0.51374  | 0.005265 | 1.23025  | 1.65551  | hsa-miR-382     |
| 0.000394 | 1.16E-03 | 5.11941   | -2.05486  | 3.61163   | 6.5706    | -0.372883 | 0.424136 | 0.487107 | 2.90562  | 2.13745  | 0.748012 | hsa-miR-432     |
| 0.000059 | 2.42E-04 | 6.81561   | -2.04801  | 2.25753   | 2.30183   | -1.40576  | 1.00091  | 0.494125 | 2.16658  | 0.989425 | 0.903291 | hsa-miR-409-3p  |
| 0        | 0.00E+00 | 0.160653  | -2.04437  | -8.89537  | -9.24139  | -6.81593  | 0.318234 | 0.386247 | 0.273784 | 0.824061 | 0.365531 | hsa-miR-650     |
| 0        | 0.00E+00 | 4.82625   | -1.93296  | -15.3803  | -11.5932  | -10.4122  | 0.481474 | 0.798377 | 1.95658  | 1.46603  | 1.89022  | hsa-miR-329     |
| 0.000126 | 4.39E-04 | -3.02928  | -1.92385  | 4.42039   | -2.10756  | -1.52926  | 0.121419 | 0.249292 | 1.94385  | 0.695192 | 0.982593 | hsa-miR-210     |
| 0.000392 | 1.59E-03 | -5.3407   | -1.9205   | 2.71516   | -7.10172  | -0.436832 | 0.24019  | 0.996175 | 1.69353  | 1.58924  | 1.55784  | hsa-miR-663b    |
| 0.012529 | 2.12E-02 | -3.43326  | -1.85264  | 1.13697   | 1.02102   | -0.297018 | 0.086429 | 0.254571 | 1.23882  | 1.29477  | 1.38315  | hsa-miR-125a-5p |
| 0.001551 | 3.71E-03 | 2.20604   | -1.81486  | 3.63525   | 4.69592   | 1.21573   | 0.240796 | 0.73661  | 2.08338  | 0.754015 | 0.961916 | hsa-miR-454     |
| 0.000002 | 1.47E-05 | 1.93532   | -1.79895  | 7.55746   | 4.19454   | 6.50084   | 0.230408 | 0.675774 | 2.05808  | 0.617211 | 1.13858  | hsa-miR-432*    |
| 0.016756 | 3.35E-02 | -1.24369  | -1.78015  | 0.41606   | -2.99074  | 6.20522   | 0.82602  | 1.36699  | 4.18237  | 4.05502  | 1.68949  | hsa-miR-525-3p  |
| 0.003658 | 7.38E-03 | -0.219227 | -1.6878   | -2.71569  | 4.31303   | 4.59684   | 0.205231 | 1.62118  | 3.77713  | 1.40732  | 1.10933  | hsa-miR-383     |
| 0.000273 | 1.20E-03 | 2.20739   | -1.67205  | 2.14251   | 3.82358   | -0.598685 | 0.396653 | 0.307054 | 2.46256  | 0.841975 | 0.41362  | hsa-miR-600     |
| 0.006961 | 1.26E-02 | 3.33332   | -1.66447  | 3.91132   | 1.59088   | 1.28443   | 0.285047 | 0.357297 | 1.76939  | 1.1591   | 1.12734  | hsa-miR-493     |
| 0.000852 | 3.03E-03 | -6.43569  | -1.58722  | 1.55338   | 1.66201   | -2.5428   | 0.320368 | 0.38034  | 1.88625  | 0.772362 | 1.89684  | hsa-miR-1237    |
| 0.002596 | 5.63E-03 | -5.1213   | -1.498    | 0.485307  | 2.69475   | 1.187     | 0.133607 | 0.316037 | 2.18473  | 1.63753  | 1.65574  | hsa-miR-326     |
| 0.000927 | 3.15E-03 | 2.84692   | -1.46191  | 2.48032   | 1.77211   | 0.247096  | 0.461785 | 0.607269 | 0.896357 | 1.2952   | 0.446494 | hsa-miR-450b-5p |
| 0.026981 | 4.91E-02 | 0.732678  | -1.4096   | -2.99864  | -2.02738  | -1.34281  | 0.734737 | 0.463995 | 0.792863 | 0.57574  | 0.914802 | hsa-miR-450b-3p |
| 0.000003 | 2.15E-05 | -1.94494  | -1.3779   | 7.72451   | 2.71089   | 4.70961   | 0.306414 | 0.563729 | 0.310285 | 1.64626  | 1.70747  | hsa-miR-148a*   |
| 0.003087 | 8.79E-03 | 5.83386   | -1.37451  | 0.999381  | -4.35178  | 0.35067   | 0.387162 | 0.53496  | 0.095797 | 3.94314  | 1.50779  | hsa-miR-130a*   |
| 0.004523 | 1.16E-02 | -1.6531   | -1.22455  | 0.634874  | -6.57453  | -1.09768  | 0.600767 | 0.982769 | 1.76301  | 1.43593  | 0.801685 | hsa-miR-149*    |
| 0.001254 | 3.09E-03 | -1.44302  | -1.21694  | 4.51433   | 2.80726   | 6.8083    | 0.143925 | 0.210784 | 0.026725 | 1.43981  | 2.37202  | hsa-miR-181c    |
| 0.015572 | 2.60E-02 | 0.429663  | -1.18779  | 11.8385   | 1.9648    | 6.10536   | 0.300104 | 0.290776 | 2.16428  | 5.36804  | 1.45768  | hsa-let-7e      |
| 0.022966 | 3.60E-02 | -3.3443   | -1.13456  | -3.04278  | -1.73211  | -3.25852  | 0.179852 | 0.260488 | 1.02432  | 0.927879 | 0.490233 | hsa-miR-31      |
| 0.000098 | 4.84E-04 | 4.30238   | -1.1334   | 7.17055   | 6.15578   | 2.63571   | 0.396087 | 0.383944 | 1.8715   | 0.982306 | 1.28747  | hsa-miR-424*    |
| 0.029754 | 4.57E-02 | 2.3807    | -1.09249  | -4.55207  | -4.16886  | -2.91753  | 0.340264 | 0.654923 | 3.56975  | 1.86882  | 1.35354  | hsa-miR-361-5p  |
| 0        | 0.00E+00 | -0.152699 | -1.07196  | 9.31467   | 6.68971   | 5.71378   | 0.27864  | 0.7282   | 0.162892 | 1.03279  | 1.2829   | hsa-miR-204     |
| 0.004329 | 1.14E-02 | 2.43985   | -1.05158  | 1.90836   | -2.65001  | 0.148339  | 0.220397 | 0.582435 | 1.05306  | 1.19175  | 1.17907  | hsa-miR-487a    |
| 0.005853 | 1.11E-02 | 2.30734   | -1.05016  | 7.93498   | 4.90099   | 4.3037    | 0.156471 | 1.02277  | 2.28966  | 3.04456  | 1.50702  | hsa-miR-190     |
| 0.003508 | 7.15E-03 | 0.781912  | -1.04427  | 6.27474   | 3.05762   | 3.21617   | 0.120788 | 0.309515 | 1.44232  | 1.12     | 1.71399  | hsa-miR-660     |
| 0.002698 | 5.78E-03 | -5.55169  | -1.02902  | -6.7465   | -4.93391  | -4.40507  | 0.283257 | 0.640156 | 0.986735 | 0.874716 | 1.34982  | hsa-miR-663     |
| 0.006467 | 1.19E-02 | 4.8305    | -1.00268  | 3.85907   | -5.24943  | -2.2029   | 0.364445 | 0.761549 | 1.34433  | 4.954    | 1.11898  | hsa-miR-433     |
| 0.005903 | 1.11E-02 | -3.93883  | -0.896615 | 6.83615   | 5.45486   | 5.65384   | 0.133458 | 0.359071 | 3.73415  | 4.84007  | 2.39885  | hsa-miR-200c    |

|          |          |           |           |           |           |           |          |          |          |          |          |                   |
|----------|----------|-----------|-----------|-----------|-----------|-----------|----------|----------|----------|----------|----------|-------------------|
| 0.00049  | 1.40E-03 | 1.95042   | -0.888527 | 8.79926   | 9.17886   | 6.89004   | 0.298999 | 0.391308 | 3.87105  | 3.58545  | 1.50909  | hsa-miR-95        |
| 0.013016 | 2.20E-02 | 3.68371   | -0.733888 | -17.4301  | -15.677   | -11.3829  | 0.44291  | 6.59409  | 3.24786  | 2.90306  | 1.7346   | hsa-miR-374b*     |
| 0.015003 | 3.08E-02 | -0.27541  | -0.677977 | -2.60051  | -1.59395  | -4.59198  | 0.249054 | 0.384709 | 1.49737  | 1.90945  | 0.741955 | hsa-miR-1972      |
| 0.011107 | 1.91E-02 | -1.3157   | -0.608844 | -3.64893  | -3.90964  | -1.23275  | 0.136581 | 0.418521 | 0.693437 | 1.22977  | 0.882374 | hsa-miR-495       |
| 0.000033 | 1.47E-04 | 1.15602   | -0.541075 | 7.39583   | 7.85342   | 4.6485    | 0.260487 | 0.679016 | 1.88339  | 1.89166  | 0.811606 | hsa-miR-33b       |
| 0.000005 | 3.01E-05 | 0.338973  | -0.503429 | -4.67136  | 1.48556   | -5.80957  | 0.250671 | 0.484981 | 0.648317 | 1.26856  | 1.14914  | hsa-miR-9         |
| 0.004687 | 1.18E-02 | -1.65561  | -0.474657 | 3.28845   | 3.56024   | 0.824702  | 0.219664 | 0.607724 | 1.24861  | 0.864261 | 1.40424  | hsa-miR-200b*     |
| 0        | 0.00E+00 | -1.56179  | -0.403125 | -6.57335  | -5.95217  | -6.12529  | 0.080926 | 0.520913 | 0.876017 | 0.776928 | 0.655022 | hsa-miR-885-3p    |
| 0.00363  | 7.36E-03 | 3.41565   | -0.313587 | 7.18934   | 5.04004   | 4.6061    | 0.226806 | 0.207642 | 2.11249  | 0.904236 | 1.74687  | hsa-miR-933       |
| 0.001921 | 6.07E-03 | 1.16676   | -0.274868 | 8.34189   | -2.14738  | 0.449837  | 0.323544 | 0.766548 | 1.15168  | 2.14451  | 1.68999  | hsa-miR-323-5p    |
| 0.00043  | 1.70E-03 | -1.30149  | -0.274235 | 3.79195   | -10.2904  | -2.83144  | 0.468713 | 0.777414 | 4.05359  | 2.96206  | 0.678861 | hsa-miR-23a*      |
| 0.016631 | 2.74E-02 | 7.98177   | -0.266995 | 6.71712   | 6.50294   | 6.12727   | 1.36088  | 0.47306  | 2.71087  | 2.82511  | 1.86102  | hsa-miR-299-5p    |
| 0.003388 | 6.94E-03 | 1.99565   | -0.235412 | 5.50701   | 2.63887   | 8.04554   | 0.22845  | 0.394584 | 3.58337  | 1.9345   | 0.885574 | hsa-miR-323-3p    |
| 0.003916 | 1.06E-02 | 1.83172   | -0.15632  | 5.74427   | 6.58106   | 1.22963   | 0.616203 | 0.380208 | 2.52131  | 1.61406  | 0.946148 | hsa-miR-92a-2*    |
| 0.000006 | 3.44E-05 | 5.36565   | -0.097515 | 9.1208    | 2.16313   | 3.15094   | 0.353249 | 0.52223  | 1.20743  | 0.455251 | 1.27294  | hsa-miR-487b      |
| 0.026514 | 4.91E-02 | 0.357304  | -0.089429 | 1.24435   | 0.132411  | -2.99861  | 0.412483 | 0.814164 | 0.75297  | 1.45402  | 0.992083 | hsa-miR-770-5p    |
| 0.007685 | 1.78E-02 | 1.94051   | -0.032146 | 1.05725   | -2.63946  | -0.890815 | 0.297394 | 0.769785 | 1.73236  | 0.37845  | 0.560064 | hsa-miR-195*      |
| 0.004984 | 1.24E-02 | -0.208544 | -0.029673 | -4.54931  | -4.94784  | -3.57501  | 0.399639 | 0.716143 | 0.537359 | 2.59772  | 0.684551 | hsa-miR-639       |
| 0.000005 | 3.01E-05 | -2.20897  | 0.024412  | 7.63244   | 3.89809   | 2.66866   | 0.230075 | 0.365483 | 1.94845  | 0.722818 | 1.10697  | hsa-miR-449a      |
| 0.003501 | 9.62E-03 | 0.962951  | 0.094303  | 5.40419   | 5.20231   | 3.4118    | 0.29198  | 0.703622 | 0.632005 | 2.45012  | 0.72541  | hsa-miR-200c*     |
| 0.000001 | 8.32E-06 | -6.78689  | 0.154911  | 5.44417   | 3.53733   | 2.92731   | 0.308279 | 0.593088 | 3.61459  | 1.03654  | 1.20867  | hsa-miR-891b      |
| 0.023531 | 4.56E-02 | -0.20816  | 0.302507  | -2.24003  | -3.29794  | 1.54851   | 0.582757 | 0.638622 | 1.2194   | 2.06883  | 0.748469 | hsa-miR-551a      |
| 0.006172 | 1.16E-02 | 5.15212   | 0.333501  | 5.38137   | 3.05173   | 4.0174    | 0.873028 | 0.483862 | 0.942516 | 1.77916  | 1.07123  | hsa-miR-410       |
| 0.000124 | 4.36E-04 | 1.68268   | 0.342995  | 1.00199   | -2.90244  | -1.37933  | 0.342707 | 0.388706 | 1.38366  | 0.954668 | 0.242294 | hsa-miR-138       |
| 0.003992 | 1.07E-02 | 1.02696   | 0.347093  | -5.66132  | -2.40446  | -3.18358  | 0.361295 | 0.393482 | 0.634256 | 2.92973  | 0.982051 | hsa-miR-629*      |
| 0        | 0.00E+00 | 0.305391  | 0.349431  | -7.35903  | -6.35744  | -6.6826   | 0.242745 | 0.468919 | 0.170161 | 0.562642 | 0.525038 | hsa-miR-1266      |
| 0.000424 | 1.23E-03 | 1.75749   | 0.616382  | -5.22473  | -6.04948  | -2.8483   | 0.230794 | 0.114174 | 2.14148  | 2.40867  | 0.960038 | hsa-miR-499-5p    |
| 0.003253 | 6.78E-03 | -3.50877  | 0.672692  | 6.98152   | 2.54974   | 1.61116   | 0.082913 | 0.391685 | 1.30131  | 3.38864  | 1.81016  | hsa-miR-147b      |
| 0.000001 | 7.77E-06 | -1.50701  | 0.701287  | -14.895   | -11.6564  | -10.4779  | 0.198795 | 0.431295 | 1.64552  | 1.04835  | 2.56729  | hsa-miR-572       |
| 0.001702 | 4.02E-03 | 0.866668  | 0.72654   | 9.16658   | -1.46967  | 2.79917   | 0.272959 | 0.663512 | 1.69716  | 1.96417  | 1.77664  | hsa-miR-520d-5p   |
| 0.025499 | 4.85E-02 | -0.081503 | 0.735843  | -2.26929  | -0.270145 | -1.94524  | 0.344725 | 0.486879 | 0.935799 | 0.647998 | 0.935515 | hsa-miR-1244      |
| 0.001919 | 4.34E-03 | 0.536685  | 0.791445  | 7.13819   | -1.71916  | -1.05353  | 0.202296 | 0.485508 | 2.47649  | 1.86929  | 1.3214   | hsa-miR-193a-5p   |
| 0.02675  | 4.91E-02 | -0.514599 | 0.89454   | -3.34674  | 1.01727   | -1.63493  | 0.34001  | 0.310101 | 2.05755  | 1.113    | 0.83663  | hsa-miR-454*      |
| 0.000463 | 1.81E-03 | -0.404977 | 0.911065  | -4.04061  | -4.65331  | -3.79954  | 0.419026 | 1.03555  | 1.11513  | 1.20603  | 0.736928 | hsa-miR-141*      |
| 0.016938 | 2.76E-02 | 7.00803   | 0.937325  | 8.73221   | 2.41052   | 3.28421   | 1.22741  | 0.4797   | 1.71296  | 3.67658  | 1.12977  | hsa-miR-625*      |
| 0        | 0.00E+00 | 0.594222  | 1.02544   | -6.71706  | -6.17144  | -5.03079  | 0.268254 | 0.565509 | 0.171124 | 0.754905 | 0.415107 | hsa-miR-564       |
| 0.001258 | 3.09E-03 | -0.23894  | 1.05774   | -4.09397  | -4.37066  | -3.03379  | 0.179348 | 0.20924  | 1.19865  | 1.15832  | 1.40331  | hsa-miR-224       |
| 0.000716 | 2.57E-03 | -0.650748 | 1.10329   | 1.78064   | 7.7823    | 1.31732   | 0.525849 | 0.622604 | 2.04945  | 1.86604  | 1.07656  | hsa-miR-659       |
| 0        | 0.00E+00 | 3.90277   | 1.17797   | -1.2287   | -4.70109  | -4.07004  | 0.148156 | 0.411411 | 0.701994 | 0.939397 | 0.180748 | hsa-miR-520a-5p   |
| 0.006287 | 1.17E-02 | -0.622127 | 1.26866   | -0.017871 | 3.71658   | 1.44603   | 0.125662 | 0.303298 | 0.861628 | 0.858228 | 1.06865  | hsa-miR-509-3p    |
| 0.018978 | 3.05E-02 | -0.842959 | 1.3048    | 3.78845   | -6.73585  | 1.55813   | 0.107786 | 0.214674 | 1.63684  | 5.08974  | 1.84606  | hsa-miR-29b-2*    |
| 0.004956 | 9.59E-03 | 0.226735  | 1.32257   | -4.64794  | -1.50596  | -0.23356  | 0.27933  | 0.728453 | 1.21676  | 0.801053 | 1.35335  | hsa-miR-143       |
| 0.000001 | 7.77E-06 | 7.80711   | 1.33257   | -0.485785 | -1.21573  | -0.767811 | 0.924512 | 0.582972 | 0.995167 | 1.28588  | 0.660686 | hsa-miR-122       |
| 0.000965 | 3.24E-03 | 1.53684   | 1.36434   | 5.04683   | -0.978175 | -0.568185 | 0.535948 | 0.6349   | 0.966904 | 1.01746  | 0.789588 | hsa-miRPlus-D1046 |
| 0.011175 | 2.47E-02 | -5.78464  | 1.37326   | 1.87382   | -1.0876   | -4.1998   | 0.429538 | 1.97216  | 2.19185  | 2.34682  | 1.00047  | hsa-miR-1265      |
| 0.005516 | 1.06E-02 | 3.83114   | 1.39453   | 0.10874   | -0.687095 | -1.20997  | 0.385686 | 0.37339  | 2.86239  | 0.53572  | 0.986774 | hsa-miR-370       |
| 0        | 0.00E+00 | 1.26046   | 1.4557    | -6.13206  | -5.43378  | -5.851    | 0.350887 | 0.327315 | 1.49255  | 0.762024 | 1.14308  | hsa-miR-520h      |

|          |          |           |         |          |           |           |          |          |          |          |          |                 |
|----------|----------|-----------|---------|----------|-----------|-----------|----------|----------|----------|----------|----------|-----------------|
| 0.003502 | 9.62E-03 | -2.10616  | 1.46096 | -3.24039 | -6.29956  | -10.8339  | 2.06672  | 0.84556  | 0.563644 | 3.0844   | 2.67784  | hsa-miR-297     |
| 0.005452 | 1.33E-02 | 3.33805   | 1.4798  | 5.23403  | 0.216779  | -1.50965  | 0.717312 | 1.0019   | 1.84778  | 2.3476   | 0.659128 | hsa-miR-1182    |
| 0        | 0.00E+00 | 0.960773  | 1.53009 | -4.73951 | -5.20789  | -3.61506  | 0.395365 | 0.369296 | 0.77831  | 0.446819 | 0.652265 | hsa-miR-604     |
| 0.008876 | 1.58E-02 | -0.812746 | 1.5815  | 3.11845  | -0.555367 | 0.754009  | 0.457099 | 0.576394 | 1.00959  | 1.46826  | 0.560139 | hsa-miR-302d*   |
| 0.001741 | 4.08E-03 | 2.13986   | 1.5888  | -4.25116 | -4.53896  | -1.24814  | 0.791457 | 0.270919 | 2.67744  | 0.678633 | 1.25267  | hsa-miR-181d    |
| 0.00019  | 6.35E-04 | 4.25467   | 1.59412 | 7.7243   | 6.02775   | 2.7848    | 0.354576 | 0.373668 | 0.401625 | 0.992893 | 0.868345 | hsa-miR-196a    |
| 0.000079 | 4.16E-04 | 2.0557    | 1.63709 | -4.29143 | -0.634477 | -1.84209  | 0.490568 | 0.700329 | 0.860622 | 0.688666 | 1.01136  | hsa-miR-10a*    |
| 0.000214 | 6.88E-04 | 2.2282    | 1.77047 | -14.9287 | -5.48296  | -9.78981  | 0.324731 | 3.36503  | 3.1087   | 3.19996  | 1.51027  | hsa-miR-934     |
| 0.001343 | 3.27E-03 | 0.804474  | 1.7735  | -2.34229 | -1.4165   | -1.16629  | 0.181419 | 0.343096 | 1.61655  | 0.598395 | 0.484296 | hsa-miR-139-5p  |
| 0.004503 | 8.89E-03 | 1.8097    | 1.80605 | 7.87443  | 9.27379   | 6.58167   | 0.12348  | 0.328512 | 2.21297  | 1.11109  | 2.17657  | hsa-miR-182     |
| 0.000013 | 6.64E-05 | -0.540439 | 1.95985 | 5.80293  | 7.45222   | 4.6695    | 0.465529 | 0.618572 | 0.973281 | 1.82874  | 0.753751 | hsa-miR-519d    |
| 0.000331 | 9.96E-04 | 1.1813    | 2.10893 | -2.82587 | -5.04876  | -4.14123  | 0.637465 | 0.857013 | 1.37932  | 0.96458  | 1.38454  | hsa-miR-545     |
| 0.000307 | 9.39E-04 | 6.88762   | 2.11428 | 1.59904  | 2.46122   | 1.2011    | 0.364756 | 0.942769 | 0.429107 | 1.07759  | 0.995647 | hsa-miR-135b    |
| 0.000007 | 4.61E-05 | 1.36733   | 2.15966 | -5.4869  | -2.73115  | -3.59086  | 0.384412 | 1.15082  | 1.05759  | 0.669222 | 0.763592 | hsa-miR-1539    |
| 0.023635 | 3.69E-02 | 6.79707   | 2.20341 | -0.4847  | 0.006751  | -0.974827 | 1.12685  | 0.388978 | 3.93122  | 1.14913  | 1.82012  | hsa-miR-369-5p  |
| 0.029435 | 4.56E-02 | 3.64299   | 2.21242 | -1.58182 | -4.07451  | -0.439102 | 0.340163 | 0.555094 | 1.46962  | 4.08194  | 1.29453  | hsa-miR-620     |
| 0.005822 | 1.11E-02 | 3.83259   | 2.37787 | 5.25801  | 8.52101   | 3.29732   | 0.3035   | 0.397855 | 0.03046  | 1.00789  | 1.39746  | hsa-miR-367     |
| 0.014911 | 3.08E-02 | -1.67459  | 2.38161 | -3.16538 | -4.8683   | 1.28726   | 0.365541 | 0.956083 | 3.09543  | 1.26238  | 1.55429  | hsa-miR-1179    |
| 0.001891 | 4.30E-03 | -1.82624  | 2.41377 | -11.8189 | -2.03189  | -5.57289  | 0.258664 | 0.535625 | 3.40327  | 2.90401  | 2.3625   | hsa-miR-22*     |
| 0        | 0.00E+00 | 1.51018   | 2.45695 | -5.90711 | -5.25785  | -4.44487  | 0.54178  | 1.06349  | 0.180225 | 0.882154 | 0.826707 | hsa-miR-1247    |
| 0.000266 | 8.27E-04 | -1.73944  | 2.50723 | -4.27085 | -1.73395  | -3.91426  | 0.115023 | 0.419401 | 1.57892  | 1.76412  | 0.911835 | hsa-miR-940     |
| 0.000412 | 1.65E-03 | 2.7345    | 2.51827 | -2.46279 | -4.3337   | -5.13972  | 0.58376  | 1.53809  | 2.36822  | 1.92774  | 0.592501 | hsa-miR-612     |
| 0.000007 | 3.90E-05 | 0.894     | 2.55376 | -2.76673 | -3.34373  | -2.65491  | 0.150483 | 0.474992 | 1.10142  | 0.924477 | 0.816216 | hsa-miR-671-5p  |
| 0.000194 | 6.35E-04 | -2.01942  | 2.61119 | 4.34664  | 3.17992   | 4.11224   | 0.18331  | 0.632482 | 1.70916  | 0.495738 | 1.10072  | hsa-miR-146b-5p |
| 0.001444 | 3.47E-03 | 3.93139   | 2.61499 | 6.82616  | 8.5623    | 5.37521   | 0.17368  | 0.659285 | 0.212796 | 0.690841 | 1.47261  | hsa-miR-135a    |
| 0.003859 | 1.05E-02 | -1.01632  | 2.63484 | -0.8678  | -6.16056  | -3.60832  | 0.810208 | 0.408525 | 2.34685  | 2.99315  | 0.725971 | hsa-miR-518e*   |
| 0.004513 | 1.16E-02 | 1.41971   | 2.72337 | -3.97691 | -5.07178  | -6.06299  | 1.73601  | 1.06385  | 1.77266  | 0.567083 | 2.53724  | hsa-miR-1183    |
| 0.018123 | 2.93E-02 | 2.46532   | 2.72527 | -5.74239 | -5.5661   | -4.70133  | 0.482296 | 0.774289 | 4.75627  | 3.74283  | 1.74826  | hsa-miR-596     |
| 0        | 0.00E+00 | 5.16169   | 2.73152 | -5.08277 | -5.83477  | -2.92758  | 0.315191 | 0.41742  | 0.89568  | 0.837859 | 1.43669  | hsa-miR-615-3p  |
| 0.023739 | 4.57E-02 | 3.93917   | 2.7437  | 0.567538 | 1.75416   | -1.82186  | 0.595819 | 1.17463  | 0.454886 | 0.179257 | 1.96871  | hsa-miR-626     |
| 0.015732 | 3.17E-02 | 3.08793   | 2.79667 | 6.67444  | 7.22377   | 3.71926   | 0.424433 | 0.771993 | 0.784994 | 1.83034  | 1.03736  | hsa-miR-769-3p  |
| 0.009105 | 2.06E-02 | 1.38629   | 2.79958 | 6.81245  | 6.02901   | 3.90285   | 0.444393 | 0.584408 | 1.35714  | 2.25786  | 0.625044 | hsa-miR-1253    |
| 0.000012 | 7.58E-05 | 1.16182   | 2.97363 | -5.51659 | -2.25568  | -3.54383  | 0.71348  | 0.979488 | 1.76126  | 0.46358  | 0.63213  | hsa-miR-518f*   |
| 0        | 0.00E+00 | 3.20736   | 3.18612 | -5.81526 | -4.2171   | -4.82111  | 0.880924 | 1.02156  | 0.250168 | 0.603015 | 0.448226 | hsa-miR-562     |
| 0        | 0.00E+00 | 0.262847  | 3.2081  | -10.4098 | -7.36617  | -6.99348  | 1.13026  | 0.417471 | 1.35996  | 1.49248  | 1.83911  | hsa-miR-181a*   |
| 0.00026  | 8.15E-04 | 2.14235   | 3.31891 | -2.23875 | -3.02663  | -0.340441 | 0.269739 | 0.28839  | 1.12663  | 2.08679  | 0.743662 | hsa-miR-886-5p  |
| 0.001785 | 5.70E-03 | 2.84928   | 3.38267 | 9.40825  | 6.13332   | 5.73525   | 0.559924 | 0.516946 | 1.43324  | 1.11911  | 1.08099  | hsa-miR-892a    |
| 0.016041 | 2.66E-02 | -0.031711 | 3.38797 | 4.70471  | 5.97655   | 4.08676   | 0.505787 | 0.390693 | 1.87668  | 0.679359 | 1.67071  | hsa-miR-921     |
| 0.002039 | 6.38E-03 | 2.67423   | 3.47941 | 5.46665  | 11.3352   | 4.59759   | 0.768098 | 1.15626  | 0.464495 | 1.94055  | 1.07668  | hsa-miR-548c-5p |
| 0.00426  | 1.13E-02 | 1.55972   | 3.49215 | 7.52694  | 5.32847   | 3.23181   | 0.324488 | 0.606902 | 1.08496  | 1.22167  | 1.48721  | hsa-miR-516a-3p |
| 0.000494 | 1.40E-03 | 7.53667   | 3.56927 | -5.65811 | -1.93471  | -4.4463   | 0.614455 | 0.440377 | 3.6769   | 3.09459  | 2.29139  | hsa-miR-154*    |
| 0        | 0.00E+00 | 1.59282   | 3.61497 | -4.53272 | -4.0707   | -2.94782  | 0.496305 | 0.493996 | 1.03856  | 0.580032 | 0.481724 | hsa-miR-708*    |
| 0.012283 | 2.66E-02 | 2.3438    | 3.62253 | 4.99713  | 5.32142   | 2.65426   | 0.418785 | 0.545204 | 1.24685  | 1.00905  | 0.297745 | hsa-miR-550*    |
| 0.004789 | 9.35E-03 | 7.1924    | 3.70685 | -9.81291 | -4.08502  | -5.2991   | 0.854902 | 0.609521 | 3.81751  | 5.37825  | 3.36767  | hsa-miR-296-5p  |
| 0.000006 | 3.44E-05 | -0.157445 | 3.77138 | 9.79747  | 6.26462   | 5.03136   | 0.294866 | 0.229863 | 1.1487   | 0.852455 | 1.31995  | hsa-miR-147     |
| 0.011584 | 2.54E-02 | 4.15726   | 3.86856 | 0.397089 | -1.29403  | 2.93612   | 0.922727 | 0.577307 | 0.761595 | 1.25399  | 1.50287  | hsa-miR-1912    |
| 0.003434 | 9.60E-03 | 2.98521   | 3.90026 | 4.35874  | 4.70914   | 0.524941  | 0.128993 | 0.420112 | 0.793545 | 1.73219  | 0.48019  | hsa-miR-767-3p  |

|          |          |          |         |           |           |           |          |          |          |          |          |                   |
|----------|----------|----------|---------|-----------|-----------|-----------|----------|----------|----------|----------|----------|-------------------|
| 0.000117 | 5.52E-04 | 1.9236   | 4.00032 | -4.92781  | -4.30412  | -5.32654  | 1.21953  | 1.44795  | 0.416842 | 1.05777  | 1.81275  | hsa-miR-577       |
| 0.021509 | 4.20E-02 | 1.93234  | 4.04615 | 3.17419   | 0.888052  | -1.85718  | 0.385326 | 0.98212  | 2.12697  | 1.95396  | 1.16826  | hsa-miR-1205      |
| 0.000841 | 2.24E-03 | 0.768265 | 4.13609 | 5.88894   | 2.47153   | 0.727     | 0.148517 | 0.571903 | 1.50432  | 0.899429 | 0.912439 | hsa-miR-184       |
| 0.000105 | 5.03E-04 | 0.947984 | 4.20908 | 6.01894   | 9.78211   | 9.58281   | 0.303502 | 1.22793  | 2.33012  | 2.15431  | 0.385525 | hsa-miR-106a*     |
| 0.000911 | 2.41E-03 | 2.06485  | 4.30314 | 2.52932   | 2.03013   | -2.41876  | 0.193776 | 0.633579 | 2.51632  | 0.338351 | 0.77826  | hsa-miR-149       |
| 0.009084 | 2.06E-02 | 1.45351  | 4.39549 | 1.12012   | 8.58552   | 3.10416   | 0.587753 | 0.880138 | 0.901286 | 2.04603  | 1.61852  | hsa-miR-1272      |
| 0.002449 | 7.51E-03 | 4.98084  | 4.42208 | -0.989648 | 4.52242   | 3.90658   | 0.648744 | 0.302393 | 1.28255  | 1.58144  | 0.894983 | hsa-miR-573       |
| 0.001106 | 2.81E-03 | 5.36122  | 4.51851 | 0.951891  | -2.34194  | -0.900623 | 0.312941 | 0.824979 | 2.15162  | 2.49908  | 1.18882  | hsa-miR-200b      |
| 0.001174 | 2.96E-03 | 7.95968  | 4.52538 | 5.52845   | 4.46653   | 3.86022   | 0.396959 | 0.434123 | 0.534805 | 0.625007 | 0.988454 | hsa-miR-202*      |
| 0.00002  | 9.33E-05 | 2.85146  | 4.52743 | -3.1868   | -3.63728  | -0.738712 | 0.175536 | 0.360968 | 1.57007  | 1.13135  | 1.39108  | hsa-miR-124       |
| 0.009048 | 1.61E-02 | 3.29689  | 4.89681 | 6.76329   | 1.37878   | 2.24091   | 0.182396 | 0.179293 | 1.22194  | 1.67832  | 1.18183  | hsa-miR-518c      |
| 0        | 0.00E+00 | 7.66239  | 4.90643 | -10.6324  | -8.16755  | -7.26138  | 0.837446 | 1.13097  | 2.04906  | 1.04918  | 1.62141  | hsa-miR-548c-3p   |
| 0.000082 | 3.09E-04 | 1.28549  | 4.99593 | -12.1086  | -12.083   | -8.55026  | 0.24554  | 1.88287  | 5.30007  | 1.8155   | 2.37684  | hsa-miR-622       |
| 0.013663 | 2.92E-02 | -1.63056 | 5.01433 | -0.439228 | -5.16298  | -1.23525  | 2.91123  | 1.25548  | 1.01332  | 1.90581  | 1.48011  | hsa-miRPlus-D1061 |
| 0        | 0.00E+00 | 3.52258  | 5.01577 | -4.62406  | -2.99916  | -3.45814  | 0.591561 | 0.830221 | 0.054395 | 1.06674  | 0.884373 | hsa-miR-218-1*    |
| 0.000375 | 1.11E-03 | 1.03357  | 5.06237 | -8.28236  | -13.4261  | -6.22959  | 2.07889  | 1.93924  | 3.81431  | 0.9341   | 2.33992  | hsa-miR-662       |
| 0.027602 | 4.98E-02 | 1.52297  | 5.08116 | 7.86374   | 5.01425   | -6.64803  | 0.572954 | 0.822093 | 0.409995 | 2.36854  | 7.04985  | hsa-miR-579       |
| 0.002381 | 5.22E-03 | 6.43658  | 5.15762 | 3.00792   | 2.10498   | -0.287831 | 1.06576  | 0.851666 | 1.98282  | 0.915278 | 1.0239   | hsa-miR-216b      |
| 0.002668 | 5.75E-03 | 3.87953  | 5.20268 | 7.72759   | 0.069104  | 1.5372    | 0.194694 | 0.752637 | 1.47398  | 1.82372  | 1.08159  | hsa-miR-521       |
| 0.004312 | 8.63E-03 | -3.52774 | 5.30229 | -2.34794  | -3.07868  | -1.12158  | 0.254553 | 0.965764 | 1.015    | 0.665476 | 2.80236  | hsa-miR-665       |
| 0.000816 | 2.19E-03 | 6.93014  | 5.37112 | -0.856181 | 0.373669  | 3.81443   | 0.738423 | 0.665986 | 2.30743  | 0.978081 | 1.32887  | hsa-miR-381       |
| 0.010415 | 2.32E-02 | 3.65458  | 5.46561 | -3.29011  | -5.80049  | -1.21964  | 0.563985 | 0.789392 | 1.64438  | 5.07377  | 1.17037  | hsa-miR-548o      |
| 0        | 0.00E+00 | 4.79226  | 5.47119 | -5.00307  | -1.09694  | -3.47785  | 0.288276 | 0.462732 | 1.34193  | 0.975066 | 0.700861 | hsa-miR-558       |
| 0.019384 | 3.80E-02 | 2.22235  | 5.52384 | -3.29152  | -1.38998  | 0.787224  | 0.657417 | 1.06907  | 4.00591  | 1.26356  | 1.23351  | hsa-miR-19b-2*    |
| 0.002883 | 8.44E-03 | 1.29969  | 5.57155 | 8.32315   | 7.05472   | 3.16562   | 0.326907 | 1.02034  | 1.31304  | 2.72847  | 0.909896 | hsa-miR-200a*     |
| 0.026323 | 4.91E-02 | 4.35336  | 5.59669 | -0.978766 | 5.16414   | 0.744528  | 0.774333 | 1.47507  | 2.50517  | 1.74256  | 1.33839  | hsa-miR-508-5p    |
| 0.004964 | 9.59E-03 | 3.97337  | 5.60418 | -8.13266  | -6.11201  | -0.133746 | 1.02871  | 0.828221 | 3.84319  | 4.61329  | 2.78665  | hsa-miR-498       |
| 0.022876 | 3.60E-02 | 1.11839  | 5.61829 | 1.6861    | 0.238655  | -0.332006 | 1.14429  | 1.30637  | 0.784458 | 1.87013  | 1.34861  | hsa-miR-617       |
| 0.005746 | 1.10E-02 | 9.75673  | 5.63159 | 3.86543   | -0.402765 | 1.63496   | 0.262783 | 0.391272 | 0.43757  | 2.69185  | 2.90626  | hsa-miR-372       |
| 0.000002 | 1.47E-05 | 2.72155  | 5.67946 | -2.40403  | -2.57333  | -1.43855  | 0.620638 | 0.584831 | 1.30964  | 0.944748 | 0.987124 | hsa-miR-555       |
| 0.000498 | 1.40E-03 | 4.75381  | 5.91643 | -5.48448  | -3.52994  | -3.37773  | 0.786261 | 1.96857  | 2.95606  | 2.4665   | 1.60384  | hsa-miR-510       |
| 0.00152  | 4.95E-03 | 3.59755  | 5.92089 | 5.37298   | 0.124872  | 2.46255   | 0.504927 | 0.209598 | 1.31671  | 1.20092  | 1.08395  | hsa-miR-1911*     |
| 0.006465 | 1.19E-02 | 1.47707  | 5.92693 | 7.38545   | 4.10213   | 1.38111   | 0.209096 | 0.458376 | 4.10145  | 2.05726  | 0.836969 | hsa-miR-34c-5p    |
| 0.000207 | 6.71E-04 | 2.57099  | 5.92953 | -0.448264 | -1.67358  | -1.19703  | 0.271886 | 0.336828 | 2.45779  | 0.944241 | 1.16602  | hsa-miR-199a-5p   |
| 0.000006 | 3.44E-05 | 3.2264   | 5.9341  | -5.21556  | -2.11415  | -4.82219  | 0.394774 | 0.70869  | 2.18299  | 1.14419  | 1.79174  | hsa-miR-490-3p    |
| 0.000898 | 3.12E-03 | 2.7395   | 5.94125 | 3.47664   | 9.70366   | 3.93276   | 0.583464 | 0.578011 | 1.88419  | 0.674877 | 0.666862 | hsa-miR-1200      |
| 0.000014 | 7.06E-05 | 6.90009  | 6.03065 | -16.5983  | -12.3182  | -8.42869  | 0.69461  | 3.92492  | 2.66032  | 1.60067  | 2.68974  | hsa-miR-623       |
| 0.000657 | 2.39E-03 | 4.24466  | 6.05754 | 3.25806   | 5.25402   | -1.46073  | 0.760099 | 1.21751  | 0.824716 | 1.61141  | 1.16673  | hsa-miR-488*      |
| 0.007735 | 1.78E-02 | 3.22492  | 6.08798 | 2.09446   | -4.51823  | -1.97062  | 1.72011  | 2.11025  | 1.19686  | 2.78216  | 1.6102   | hsa-miR-619       |
| 0.000202 | 9.25E-04 | 3.98153  | 6.11672 | -1.44609  | 1.25351   | 2.40575   | 0.64283  | 0.171181 | 1.20327  | 1.22868  | 1.18298  | hsa-miR-453       |
| 0.005992 | 1.45E-02 | 3.04075  | 6.16947 | 1.73184   | -0.0802   | 1.34812   | 0.427764 | 1.45027  | 1.17973  | 1.36618  | 0.803651 | hsa-miR-548m      |
| 0        | 0.00E+00 | 7.08889  | 6.22923 | -8.06806  | -6.7061   | -4.8359   | 0.681885 | 0.484105 | 2.1488   | 0.511597 | 1.40544  | hsa-miR-127-5p    |
| 0.002898 | 6.14E-03 | 8.01267  | 6.34775 | -1.02338  | 7.00995   | 4.50835   | 0.409272 | 0.476575 | 3.11656  | 1.20177  | 1.65072  | hsa-miR-200a      |
| 0.000626 | 1.73E-03 | 2.84182  | 6.52754 | 0.608798  | 3.50288   | -0.183876 | 0.323916 | 0.472966 | 0.547532 | 1.46947  | 1.53422  | hsa-miR-373*      |
| 0.009844 | 2.21E-02 | 3.67398  | 6.54408 | -4.61847  | 0.427187  | 3.80211   | 0.796827 | 1.02356  | 1.84661  | 3.32178  | 2.25835  | hsa-miR-34b*      |
| 0.0044   | 8.73E-03 | 5.39243  | 6.55941 | -4.05494  | -3.24136  | -1.46721  | 1.26609  | 0.276026 | 1.90339  | 5.34293  | 1.5836   | hsa-miR-20b       |
| 0.015111 | 3.08E-02 | 3.17027  | 6.69247 | 5.65002   | 6.43063   | 2.73098   | 0.381059 | 0.825606 | 1.36801  | 1.49572  | 0.80795  | hsa-miR-1245      |



|          |          |          |         |           |           |           |          |          |          |          |          |                 |
|----------|----------|----------|---------|-----------|-----------|-----------|----------|----------|----------|----------|----------|-----------------|
| 0.016786 | 2.76E-02 | 4.72052  | 6.76088 | 4.61373   | 6.35242   | 2.26095   | 0.19713  | 0.519327 | 1.18581  | 0.418336 | 1.51762  | hsa-miR-21*     |
| 0.025995 | 4.89E-02 | 3.05978  | 6.78064 | 4.9778    | 7.00256   | -0.341863 | 0.702935 | 1.45722  | 2.56883  | 0.506538 | 2.13708  | hsa-miR-1908    |
| 0.000563 | 2.14E-03 | 5.04493  | 6.92067 | 5.99731   | 7.96844   | 1.22094   | 0.333933 | 0.711506 | 0.978186 | 0.803255 | 1.10233  | hsa-miR-380     |
| 0.006268 | 1.17E-02 | 4.57538  | 6.93908 | 0.407213  | -7.02451  | -1.75404  | 0.298232 | 0.418627 | 5.94416  | 0.972584 | 2.9795   | hsa-miR-10b     |
| 0.000383 | 1.59E-03 | 1.76167  | 6.96966 | 2.77875   | -0.692887 | 2.7706    | 0.471663 | 1.12967  | 1.78436  | 0.669633 | 0.94948  | hsa-miR-587     |
| 0.00504  | 1.24E-02 | 5.02014  | 7.1143  | 0.255569  | 4.59546   | 2.37376   | 0.352955 | 0.70392  | 1.16101  | 2.73566  | 0.764356 | hsa-miR-601     |
| 0.001057 | 2.70E-03 | 5.78009  | 7.25821 | -2.57888  | 0.436643  | -4.23373  | 0.682357 | 0.689606 | 4.05562  | 5.11391  | 0.937761 | hsa-miR-422a    |
| 0.0196   | 3.14E-02 | 3.64365  | 7.56307 | 6.47335   | 2.98137   | 1.37315   | 0.384714 | 0.770093 | 1.86221  | 1.57683  | 1.91286  | hsa-miR-654-5p  |
| 0.006631 | 1.21E-02 | 0.485286 | 7.63407 | 3.11871   | -0.929312 | -0.237479 | 0.295103 | 1.54414  | 1.99089  | 3.54262  | 0.944425 | hsa-miR-668     |
| 0.003272 | 6.78E-03 | 7.69305  | 7.71491 | -7.58187  | -12.3434  | -1.79637  | 0.408006 | 2.10921  | 6.31526  | 4.51619  | 2.53245  | hsa-miR-514     |
| 0.001883 | 4.30E-03 | 2.36708  | 7.83007 | 1.12222   | -4.47013  | -1.42457  | 2.06803  | 1.33782  | 2.18149  | 1.45771  | 1.90042  | hsa-miR-631     |
| 0.032415 | 4.90E-02 | 4.11204  | 7.83257 | 3.35104   | 6.26613   | 0.960906  | 0.213731 | 0.706928 | 0.839297 | 3.30908  | 1.86378  | hsa-miR-873     |
| 0.001199 | 2.98E-03 | 3.57427  | 7.86278 | 8.30841   | 0.357174  | 2.83518   | 0.363158 | 0.448401 | 2.38752  | 2.03676  | 1.32915  | hsa-miR-627     |
| 0.002377 | 7.36E-03 | 5.79446  | 7.93547 | 5.47905   | 2.75521   | 3.08411   | 0.536054 | 0.720528 | 1.22597  | 1.66942  | 0.614356 | hsa-miR-10b*    |
| 0        | 0.00E+00 | 9.62808  | 7.94211 | -7.26262  | -5.2567   | -3.35057  | 0.363297 | 0.554719 | 0.989774 | 1.78134  | 0.761526 | hsa-miR-203     |
| 0.000992 | 2.59E-03 | 7.28217  | 8.08342 | 2.32028   | 2.42861   | -0.083231 | 0.410941 | 0.571831 | 3.15951  | 1.41229  | 1.10047  | hsa-miR-518a-3p |
| 0.000087 | 3.21E-04 | 7.97118  | 8.12223 | 0.429752  | -2.67858  | -0.640493 | 0.625299 | 0.696482 | 2.48239  | 2.96411  | 1.50814  | hsa-miR-195     |
| 0.02523  | 4.83E-02 | 5.95649  | 8.13457 | -2.72258  | 1.65023   | -0.23689  | 0.568615 | 1.32196  | 1.7807   | 2.9025   | 2.80108  | hsa-miR-1974    |
| 0.000099 | 3.59E-04 | 6.70232  | 8.29896 | -3.75868  | -5.51751  | -2.9919   | 0.996285 | 1.20829  | 2.80003  | 3.83286  | 1.87611  | hsa-miR-524-3p  |
| 0.001082 | 3.56E-03 | 4.44054  | 8.38395 | -12.6168  | 0.91052   | 2.29071   | 0.655732 | 1.61353  | 3.93719  | 4.38022  | 1.46916  | hsa-miR-146b-3p |
| 0.000007 | 4.61E-05 | 5.04779  | 8.54155 | -0.042079 | 1.59741   | -1.02785  | 0.326853 | 1.31875  | 0.675293 | 0.679117 | 0.692711 | hsa-miR-548k    |
| 0.00096  | 2.52E-03 | 6.31064  | 8.76348 | -15.4098  | -7.40458  | -8.9021   | 1.56636  | 4.86308  | 1.97656  | 4.45706  | 2.68207  | hsa-miR-520c-3p |
| 0.000327 | 1.40E-03 | 1.68763  | 8.78332 | 3.61258   | 0.603464  | 1.6614    | 0.792381 | 1.63839  | 0.790343 | 1.4446   | 0.788496 | hsa-miR-103-as  |
| 0.000327 | 9.92E-04 | 7.35834  | 8.78627 | -6.63348  | 2.21754   | -4.42275  | 0.548061 | 1.05353  | 4.66288  | 3.62053  | 2.55205  | hsa-miR-597     |
| 0.000002 | 1.46E-05 | 4.85659  | 8.84661 | -1.97133  | 1.47042   | -1.23313  | 0.950286 | 0.845662 | 1.56196  | 1.74256  | 0.830324 | hsa-miR-524-5p  |
| 0        | 0.00E+00 | 6.56421  | 8.98822 | -0.15654  | -1.516    | -0.61044  | 0.612203 | 0.536384 | 0.490667 | 1.03674  | 1.19928  | hsa-miR-449b    |
| 0.006653 | 1.21E-02 | 6.42262  | 9.04594 | 7.70984   | 2.62928   | 0.435769  | 0.424513 | 0.788193 | 2.10904  | 1.38679  | 2.66121  | hsa-miR-517a    |
| 0.000286 | 8.82E-04 | 7.69215  | 9.1379  | 4.21816   | 0.009905  | -0.068616 | 0.847624 | 1.30833  | 1.11116  | 3.38351  | 0.758115 | hsa-miR-211     |
| 0.020359 | 3.23E-02 | 2.38753  | 9.27102 | 4.15777   | 4.27618   | 4.18308   | 0.47908  | 0.860011 | 3.80479  | 1.67432  | 1.46041  | hsa-miR-508-3p  |
| 0        | 0.00E+00 | 5.95902  | 9.37236 | -0.886628 | 2.92798   | -1.57316  | 0.614125 | 0.777819 | 1.20742  | 0.718687 | 0.764313 | hsa-miR-651     |
| 0.000463 | 1.33E-03 | 3.00046  | 9.45879 | 3.60423   | -0.414107 | -0.159971 | 0.285425 | 1.31771  | 2.39622  | 1.99817  | 1.4419   | hsa-miR-506     |
| 0.002715 | 5.79E-03 | 6.0413   | 9.60111 | 4.59636   | 1.9697    | 1.50267   | 0.507463 | 0.664142 | 2.26418  | 2.84731  | 1.51666  | hsa-miR-525-5p  |
| 0        | 0.00E+00 | 5.87401  | 9.66219 | 1.844     | 2.57107   | 2.30603   | 1.04379  | 0.51843  | 0.102014 | 0.566293 | 0.645491 | hsa-miR-208a    |
| 0.001005 | 2.60E-03 | 4.86513  | 9.72255 | 4.40792   | 2.74473   | 2.9598    | 0.476336 | 1.07958  | 1.52114  | 0.901188 | 1.37749  | hsa-miR-302d    |
| 0        | 0.00E+00 | 6.11572  | 9.89719 | -14.0094  | -14.3686  | -6.64205  | 0.900489 | 1.16296  | 0.72059  | 2.91518  | 3.04177  | hsa-miR-548b-3p |
| 0.000029 | 1.61E-04 | 4.1017   | 9.97413 | 5.56848   | 3.19148   | 3.25882   | 0.543044 | 0.912379 | 1.24073  | 0.684823 | 0.760478 | hsa-let-7a-2*   |
| 0.005059 | 1.24E-02 | 7.14851  | 10.0036 | -2.69613  | -2.23724  | -8.92318  | 0.220223 | 0.528331 | 4.32002  | 4.80907  | 5.68034  | hsa-miR-556-3p  |
| 0.000118 | 4.23E-04 | 7.39365  | 10.3596 | -5.48903  | 1.19031   | -1.24699  | 0.838432 | 0.444263 | 1.91644  | 3.96671  | 2.25808  | hsa-miR-492     |
| 0.013054 | 2.81E-02 | 6.63454  | 10.6648 | -0.581913 | -5.12813  | -7.675    | 0.353683 | 1.45961  | 4.34453  | 5.96411  | 4.4852   | hsa-miR-518a-5p |
| 0.001783 | 4.16E-03 | 6.86853  | 10.7105 | 0.67421   | -2.9754   | -0.293415 | 0.691161 | 0.294391 | 6.00958  | 4.26133  | 2.65791  | hsa-miR-519a    |
| 0.000019 | 8.97E-05 | 4.4276   | 10.8057 | -6.06522  | -2.35346  | -4.43862  | 0.448166 | 0.702297 | 3.61619  | 5.21648  | 1.34166  | hsa-miR-202     |
| 0.002708 | 8.07E-03 | 0.076642 | 10.814  | -9.67767  | -10.5228  | -7.77288  | 1.27539  | 1.79003  | 4.96111  | 2.55767  | 5.9422   | hsa-miR-624*    |
| 0.000144 | 4.92E-04 | 4.29013  | 11.105  | -7.11442  | -9.69825  | -2.83179  | 1.29364  | 1.09902  | 1.84789  | 3.31801  | 4.92187  | hsa-miR-598     |
| 0.000004 | 2.53E-05 | 9.18889  | 11.6267 | -5.15088  | 11.8082   | 5.49038   | 0.406562 | 1.07557  | 3.06807  | 1.45457  | 1.54262  | hsa-miR-513a-5p |
| 0.002101 | 4.69E-03 | 7.37197  | 11.7433 | 0.837122  | 2.13982   | -0.342324 | 0.491869 | 1.54107  | 3.9829   | 2.24538  | 2.39587  | hsa-miR-518e    |
| 0.001659 | 3.94E-03 | 8.46325  | 11.8766 | 2.91878   | 3.72802   | 2.52383   | 1.03615  | 0.731936 | 2.8852   | 0.691349 | 2.04967  | hsa-miR-642     |
| 0.000025 | 1.12E-04 | 5.53173  | 11.9445 | -1.9318   | -1.19325  | -1.71139  | 0.872405 | 2.10287  | 1.18933  | 0.94113  | 1.87344  | hsa-miR-217     |

|          |          |           |          |          |           |           |          |          |          |          |          |                  |
|----------|----------|-----------|----------|----------|-----------|-----------|----------|----------|----------|----------|----------|------------------|
| 0.00002  | 1.19E-04 | 3.35743   | 12.1637  | 5.8005   | -0.69681  | 0.577223  | 1.28942  | 0.772336 | 0.980441 | 1.72785  | 1.8792   | hsa-miR-452*     |
| 0.000008 | 4.32E-05 | 7.2982    | 12.5611  | 1.72521  | 3.61986   | 2.68234   | 0.894321 | 0.435891 | 2.14609  | 0.851246 | 1.44138  | hsa-miR-220a     |
| 0.010545 | 1.82E-02 | 10.7034   | 13.2598  | 8.80061  | 3.31461   | 3.40647   | 0.58875  | 0.984424 | 2.10928  | 4.00038  | 1.70028  | hsa-miR-516a-5p  |
| 0.000004 | 2.53E-05 | 6.57589   | 13.8968  | 8.1358   | -0.360671 | 1.60624   | 0.241413 | 0.739327 | 3.20492  | 2.15022  | 0.923603 | hsa-miR-345      |
| 0.000004 | 2.53E-05 | 5.83568   | 14.3225  | -4.80034 | -12.4487  | -4.52714  | 1.82684  | 2.1727   | 5.33113  | 2.64274  | 2.34053  | hsa-miR-488      |
| 0        | 0.00E+00 | 9.73677   | 14.5416  | 2.80362  | -1.87521  | -0.557957 | 0.345578 | 1.65781  | 0.889494 | 0.743178 | 1.18229  | hsa-miR-509-3-5p |
| 0.000011 | 5.78E-05 | 7.51684   | 14.9068  | 6.91973  | 5.17547   | 4.02232   | 0.533471 | 1.30836  | 1.64365  | 0.894268 | 1.4011   | hsa-miR-517c     |
| 0        | 0.00E+00 | 5.25273   | 16.2849  | -8.589   | -2.47901  | -7.71983  | 0.637932 | 1.63386  | 2.92543  | 7.52229  | 1.20224  | hsa-miR-637      |
| 0        | 0.00E+00 | 8.60983   | 16.7438  | 1.2788   | 0.15296   | 1.21382   | 0.333625 | 1.33409  | 0.662809 | 2.09739  | 1.253    | hsa-miR-337-5p   |
| 0.000075 | 2.88E-04 | 10.8265   | 17.0692  | 3.08912  | 0.849478  | 3.09405   | 0.6371   | 0.724606 | 2.72531  | 2.01728  | 1.38355  | hsa-miR-325      |
| 0.000003 | 2.03E-05 | 7.16185   | 17.5251  | 2.35836  | 0.739735  | 1.17585   | 0.030275 | 2.45518  | 0.816951 | 1.49656  | 0.74184  | hsa-miR-557      |
| NA       | NA       | ND*       | 10.3558  | 3.04048  | 3.42081   | 4.23211   | -        | 2.43007  | 1.95917  | 3.31626  | 1.04289  | hsa-miR-1264     |
| NA       | NA       | ND*       | 10.4546  | 4.18145  | -1.35436  | 1.38076   | -        | 1.67857  | 1.50465  | 2.87562  | 1.10988  | hsa-miR-124*     |
| NA       | NA       | -0.713979 | 0.873035 | ND*      | 2.06361   | 4.35355   | 0.831929 | 0.763221 | -        | 3.24181  | 2.46728  | hsa-miR-224*     |

# = miRNAs in red represent inter-plate replicates that exceeded the FDR criterion of  $\alpha=0.05$

ND\* = not detected

NA = No ANOVAs were calculated because miRNA expression was not detected in one group
