# Supplementary material
Source: PubMed Central journal article supplement (PMC3999266)
Supplement: NIHMS567198-supplement-Supp_Data_S2.pdf [file NIHMS567198-supplement-Supp_Data_S2.pdf]

**Supplementary Data 2, Table 1: Effects of in utero ethanol exposure on plasma miRNAs in pregnant ewe and neonate**Condition 1 : Pregnant Saline  $\Delta$ CtCondition 2 : Pregnant EtOH  $\Delta$ CtCondition 3 : Lamb Saline  $\Delta$ CtCondition 4 : Lamb EtOH  $\Delta$ CtStatistics: ANOVA,  $p < 0.05$ Correction: Benjamini and Hochberg,  $\alpha = 0.05$ 

Data Transformation: Treated as Log Transformed

Color Code

|  |                 |
|--|-----------------|
|  | 25th percentile |
|  | 50th percentile |
|  | 75th percentile |

| ANOVA    | Benjamini and Hochberg adj. p-value | Pregnant Ewe |          | Neonatal Lamb |          | Pregnant Ewe |          | Neonatal Lamb |          | Gene Title     |
|----------|-------------------------------------|--------------|----------|---------------|----------|--------------|----------|---------------|----------|----------------|
|          |                                     | Control      | Ethanol  | Control       | Ethanol  | Control      | Ethanol  | Control       | Ethanol  |                |
|          |                                     | mean 1       | mean 2   | mean 3        | mean 4   | SEM 1        | SEM 2    | SEM 3         | SEM 4    |                |
| 0.002031 | 0.0221618                           | -13.5932     | -7.76952 | -10.1822      | 1.33642  | 2.89474      | 3.4618   | 1.74906       | 1.17305  | hsa-miR-134    |
| 0.000115 | 0.0035554                           | -12.083      | 0.815165 | -8.55025      | 4.14184  | 1.8155       | 2.0959   | 2.37684       | 1.05194  | hsa-miR-622    |
| 0.00042  | 0.0082011                           | -11.6564     | -13.8905 | -10.4779      | 1.73471  | 1.04835      | 3.61626  | 2.56729       | 0.983569 | hsa-miR-572    |
| 0.000057 | 0.0028289                           | -9.43853     | -13.4847 | -9.40252      | 3.99388  | 1.39192      | 2.16654  | 2.0852        | 1.96967  | hsa-miR-720    |
| 0.003505 | 0.0295535                           | -7.82976     | -10.2235 | -3.95755      | 0.410907 | 2.16132      | 0.851265 | 1.66232       | 1.74184  | hsa-miR-570    |
| 0.00388  | 0.031293                            | -6.73585     | 8.89164  | 1.55813       | -4.84808 | 5.08974      | 1.71106  | 1.84606       | 1.47385  | hsa-miR-29b-2* |
| 0.000051 | 0.0028289                           | -6.26423     | -10.6047 | -4.15594      | 1.91298  | 1.00145      | 1.36398  | 1.5563        | 1.01343  | hsa-miR-451    |
| 0.000269 | 0.0060669                           | -5.83477     | -6.245   | -2.92758      | 4.04766  | 0.837859     | 1.47616  | 1.43669       | 1.48665  | hsa-miR-615-3p |
| 0.00524  | 0.0396743                           | -5.48296     | -8.01404 | -9.78981      | 1.93151  | 3.19996      | 1.11004  | 1.51027       | 2.40313  | hsa-miR-934    |
| 0.000965 | 0.0132598                           | -5.18784     | -3.41813 | -3.51968      | 4.43931  | 1.29348      | 1.69553  | 1.13948       | 1.12213  | hsa-miR-576-5p |
| 0.002889 | 0.0261419                           | -5.04876     | -1.63348 | -4.14123      | 2.30566  | 0.96458      | 1.12763  | 1.38454       | 0.786098 | hsa-miR-545    |
| 0.001435 | 0.0172096                           | -3.44059     | -2.23179 | -2.42674      | 2.78494  | 0.4139       | 1.26168  | 0.842704      | 1.06736  | hsa-miR-128    |
| 0.00032  | 0.0065956                           | -3.34373     | -3.76397 | -2.65491      | 5.78506  | 0.924477     | 0.954553 | 0.816216      | 2.07096  | hsa-miR-671-5p |
| 0.000034 | 0.0028289                           | -2.94743     | -4.43333 | -3.60636      | 2.18245  | 1.10552      | 0.512287 | 0.627469      | 0.759945 | hsa-miR-484    |
| 0.000697 | 0.0107745                           | -2.86694     | -4.81952 | -1.00924      | 4.62085  | 0.804571     | 0.645589 | 0.822966      | 1.89543  | hsa-miR-144    |
| 0.003283 | 0.0283254                           | -1.97543     | -6.0787  | -4.58787      | 0.10244  | 1.87231      | 0.67307  | 0.896831      | 0.740781 | hsa-miR-19b    |
| 0.002756 | 0.0255619                           | -1.94257     | 4.0016   | 1.04898       | -10.6918 | 1.33834      | 3.97904  | 2.07592       | 2.30201  | hsa-miR-188-5p |
| 0.000464 | 0.0086072                           | -1.82073     | -1.62009 | -1.39102      | 8.39539  | 2.05261      | 1.52074  | 0.781669      | 1.88764  | hsa-let-7a     |
| 0.000585 | 0.0098652                           | -1.71098     | -5.66433 | -2.16171      | 3.98522  | 1.44264      | 0.606182 | 1.40755       | 0.922306 | hsa-miR-20a    |
| 0.002629 | 0.0255229                           | -1.42558     | 0.140836 | -2.45588      | 4.39279  | 0.436982     | 1.33253  | 1.00974       | 1.39644  | hsa-miR-589    |
| 0.004025 | 0.0317718                           | -1.4165      | -4.25942 | -1.16629      | 2.27492  | 0.598395     | 0.754335 | 0.484296      | 1.50285  | hsa-miR-139-5p |
| 0.001514 | 0.0175529                           | -1.41296     | -3.87437 | -2.83593      | -11.7338 | 0.796887     | 1.04665  | 0.924361      | 2.46036  | hsa-let-7d*    |
| 0.000745 | 0.0110558                           | -0.877141    | -1.80962 | -2.25213      | -11.5742 | 1.14204      | 2.47466  | 0.77477       | 2.01936  | hsa-miR-181a   |

|          |           |           |          |           |           |          |          |          |          |                 |
|----------|-----------|-----------|----------|-----------|-----------|----------|----------|----------|----------|-----------------|
| 0.002986 | 0.0263763 | -0.799733 | -5.45876 | -0.592561 | 1.02815   | 1.32308  | 1.23637  | 1.02468  | 0.514514 | hsa-miR-27a     |
| 0.000069 | 0.0028443 | 0.428123  | -3.26012 | -0.285846 | -11.8877  | 0.715682 | 1.28686  | 0.987791 | 2.13707  | hsa-miR-103     |
| 0.005685 | 0.0413556 | 1.44467   | -2.67083 | 1.0343    | 2.79634   | 0.733966 | 1.04547  | 0.973931 | 0.626315 | hsa-miR-222     |
| 0.000061 | 0.0028289 | 1.48556   | -4.22655 | -5.88957  | 4.37954   | 1.26856  | 1.02405  | 1.14914  | 1.39165  | hsa-miR-9       |
| 0.004974 | 0.0384449 | 1.5359    | 5.53361  | 3.25609   | -6.45191  | 3.71368  | 0.14223  | 1.59777  | 1.60232  | hsa-miR-129-3p  |
| 0.001438 | 0.0172096 | 1.69865   | 1.33638  | 0.691437  | -7.81277  | 1.62469  | 1.45595  | 0.892757 | 2.13559  | hsa-miR-371-3p  |
| 0.00011  | 0.0035554 | 1.71652   | 5.75888  | 2.19374   | -9.50248  | 2.6526   | 2.10086  | 1.19881  | 1.77223  | hsa-miR-337-3p  |
| 0.003668 | 0.0302406 | 1.7363    | -3.37325 | -1.33954  | 3.50156   | 0.434603 | 1.16587  | 1.30866  | 0.814481 | hsa-miR-15b     |
| 0.00119  | 0.0157675 | 2.07024   | 1.31686  | 1.13596   | -3.8967   | 1.16512  | 0.404836 | 0.462998 | 1.29746  | hsa-miR-26a-2*  |
| 0.000002 | 0.000742  | 2.89593   | -1.93929 | 4.0436    | -11.7687  | 1.55308  | 1.10811  | 0.649391 | 2.0383   | hsa-miR-142-5p  |
| 0.002533 | 0.0253985 | 2.91665   | 6.47809  | 2.17602   | -1.16371  | 1.34933  | 0.812151 | 0.935824 | 1.25691  | hsa-miR-518f    |
| 0.000225 | 0.0059625 | 3.17992   | 11.2644  | 4.11224   | -0.260415 | 0.495738 | 2.45919  | 1.10072  | 1.01354  | hsa-miR-146b-5p |
| 0.000053 | 0.0028289 | 3.61986   | 8.18509  | 2.68234   | -3.22734  | 0.851246 | 0.732603 | 1.44138  | 1.08622  | hsa-miR-220a    |
| 0.000004 | 0.000742  | 3.65166   | 1.37093  | 3.07544   | -10.0411  | 1.44549  | 0.814081 | 1.12308  | 1.72309  | hsa-miR-132     |
| 0.001849 | 0.0207872 | 3.95457   | 2.77561  | -0.237303 | -0.813302 | 0.739689 | 0.816261 | 0.162903 | 1.09802  | hsa-miR-153     |
| 0.002683 | 0.0255229 | 4.10213   | 9.2212   | 1.38111   | -4.99838  | 2.05726  | 2.15935  | 0.836969 | 2.61213  | hsa-miR-34c-5p  |
| 0.000513 | 0.009063  | 4.16069   | 7.78889  | 6.39481   | -5.29393  | 2.25348  | 1.64741  | 1.35811  | 1.93408  | hsa-miR-379     |
| 0.000127 | 0.0036244 | 4.39626   | 1.02219  | -0.611181 | -8.27545  | 1.85485  | 1.05853  | 1.21372  | 1.61814  | hsa-miR-187     |
| 0.000263 | 0.0060669 | 4.46653   | 6.6191   | 3.86022   | -7.2082   | 0.625007 | 0.657549 | 0.988454 | 2.62911  | hsa-miR-202*    |
| 0.00003  | 0.0028289 | 5.06624   | 4.44825  | 4.0556    | -9.08916  | 1.70058  | 0.627645 | 1.84734  | 1.66444  | hsa-miR-34b     |
| 0.002339 | 0.0241047 | 5.17547   | 5.4049   | 4.02232   | -1.22236  | 0.894268 | 0.884333 | 1.4011   | 0.405253 | hsa-miR-517c    |
| 0.006267 | 0.0447126 | 6.08716   | 5.21768  | 5.84388   | -1.63722  | 2.22356  | 0.123356 | 1.72803  | 1.10023  | hsa-miR-425*    |
| 0.00548  | 0.0406616 | 6.50294   | 9.45918  | 6.12727   | -2.4597   | 2.82511  | 2.13674  | 1.86102  | 1.79302  | hsa-miR-299-5p  |
| 0.001354 | 0.0172096 | 7.00995   | 0.122041 | 4.50835   | -6.31955  | 1.20177  | 0.804399 | 1.65072  | 2.35971  | hsa-miR-200a    |
| 0.000278 | 0.0060669 | 7.2952    | 3.41255  | 3.07912   | -3.1574   | 1.44333  | 0.285627 | 1.2233   | 1.42782  | hsa-miR-194     |
| 0.000938 | 0.0132598 | 7.49069   | 6.88525  | 5.89128   | -1.22703  | 1.91552  | 1.34667  | 1.48887  | 0.714428 | hsa-miR-299-3p  |
| 0.002232 | 0.0236592 | 7.85342   | 8.36138  | 4.6485    | 1.08594   | 1.89166  | 1.48463  | 0.811606 | 0.914146 | hsa-miR-33b     |
| 0.000115 | 0.0035554 | 8.00379   | 11.894   | 5.3303    | 0.567812  | 1.1894   | 0.681031 | 1.17955  | 1.49024  | hsa-miR-105     |
| 0.000639 | 0.0103073 | 8.5623    | 5.60058  | 5.37521   | -2.21097  | 0.690841 | 1.64818  | 1.47261  | 1.61317  | hsa-miR-135a    |

| ANOVA | Benjamini and Hochberg adj. p-value | Pregnant Ewe |         | Neonatal Lamb |         | Pregnant Ewe |         | Neonatal Lamb |          | Gene Title   |
|-------|-------------------------------------|--------------|---------|---------------|---------|--------------|---------|---------------|----------|--------------|
|       |                                     | Control      | Ethanol | Control       | Ethanol | Control      | Ethanol | Control       | Ethanol  |              |
|       |                                     | mean 1       | mean 2  | mean 3        | mean 4  | SEM 1        | SEM 2   | SEM 3         | SEM 4    |              |
| NA    | NA                                  | -2.40237     | 55      | 3.47411       | 6.06976 | 4.51162      | 0       | 2.78499       | 0.233305 | hsa-miR-190b |

|          |          |         |         |           |          |          |          |          |          |                 |
|----------|----------|---------|---------|-----------|----------|----------|----------|----------|----------|-----------------|
| 0.000414 | 0.046092 | 3.82358 | 5.91869 | -0.598685 | -1.38818 | 0.841975 | 3.30868  | 0.41362  | 0.629085 | hsa-miR-600     |
| 0.000038 | 0.012692 | 4.19454 | 9.01042 | 6.50084   | -1.18382 | 0.617211 | 0.485091 | 1.13858  | 1.23368  | hsa-miR-432*    |
| NA       | NA       | 4.76224 | 55      | 1.14656   | -1.84457 | 2.41269  | 0        | 0.849665 | 1.11512  | hsa-miR-135b*   |
| NA       | NA       | 5.01425 | 55      | -6.64803  | 9.37677  | 2.36854  | 0        | 7.04985  | 0.963462 | hsa-miR-579     |
| NA       | NA       | 6.97195 | 55      | 4.46961   | 7.09415  | 4.12065  | 0        | 2.23856  | 1.79414  | hsa-miR-548l    |
| NA       | NA       | 8.13419 | 55      | 6.42102   | 6.71079  | 0.72864  | 0        | 1.55807  | 1.78991  | hsa-miR-544     |
| NA       | NA       | 8.64775 | 55      | 6.9874    | 0.289556 | 0.517295 | 0        | 2.17092  | 3.76171  | hsa-miR-889     |
| NA       | NA       | 10.4519 | 55      | 6.18136   | 7.57651  | 4.0914   | 0        | 2.28836  | 3.9656   | hsa-miR-384     |
| NA       | NA       | 10.8415 | 55      | 5.94794   | 5.47429  | 0.670471 | 0        | 2.23439  | 1.65658  | hsa-miR-607     |
| 0.00014  | 0.02338  | 11.3352 | 1.6151  | 4.59759   | 2.93225  | 1.94055  | 0.703421 | 1.07668  | 0.413786 | hsa-miR-548c-5p |

**A mean value of '55' indicates "not expressed" in all samples within that group**

**A SEM value of "0" indicates "not expressed" in all samples within that group**

**"NA" indicates that an ANOVA was not calculated when all members of one group were 'not detected'**

### Supplementary Data 2, Table 2A

#### Statistical Tests for effect of sex of neonate offspring on plasma miRNA profiles

Group 1: Lamb\_Male\_Panel 1  $\Delta$ Ct Panel 1  
 Group 2: Lamb\_Female\_Panel 1  $\Delta$ Ct  
 Statistics: t-test  
 Correction: Benjamini and Hochberg  
 Data Transformation: Treated as Log Transformed  
 Tests: 378

| Number | Group 1 Mean | Group 1 SEM | Group 2 Mean | Group 2 SEM | p-value   | Benjamini and Hochberg adj. p-value | Gene Name      |
|--------|--------------|-------------|--------------|-------------|-----------|-------------------------------------|----------------|
| 1      | -11.25681    | 3.245386    | -0.536553    | 1.792335    | 0.0109776 | 0.9974526                           | hsa-miR-361-3p |
| 2      | -2.571733    | 1.576063    | 4.050481     | 1.634193    | 0.0184356 | 0.9974526                           | hsa-miR-302c   |
| 3      | 5.803548     | 2.168627    | 0.299584     | 1.049968    | 0.03871   | 0.9974526                           | hsa-miR-133b   |

|    |           |          |          |          |           |           |              |     |
|----|-----------|----------|----------|----------|-----------|-----------|--------------|-----|
| 4  | -4.932787 | 1.898375 | 0.495529 | 1.199791 | 0.0335849 | 0.9974526 | hsa-miR-570  | **  |
| 5  | -2.307716 | 0.857933 | 2.841641 | 1.474925 | 0.0223135 | 0.9974526 | hsa-miR-370  |     |
| 6  | -0.705232 | 1.686053 | 4.277888 | 0.947276 | 0.0202197 | 0.9974526 | hsa-miR-26a  |     |
| 7  | 0.758207  | 1.118991 | 5.723355 | 1.093288 | 0.0158224 | 0.9974526 | hsa-miR-660  |     |
| 8  | 5.86606   | 1.211604 | 1.08559  | 0.901418 | 0.0088664 | 0.9974526 | hsa-miR-383  |     |
| 9  | -1.49477  | 1.507938 | 2.840689 | 1.22327  | 0.0482094 | 0.9974526 | hsa-miR-877  |     |
| 10 | -2.510734 | 1.388985 | 1.274407 | 0.526739 | 0.0162715 | 0.9974526 | hsa-miR-433  | *** |
| 11 | -0.336324 | 0.890168 | 3.359707 | 0.857444 | 0.0152982 | 0.9974526 | hsa-miR-211  | *** |
| 12 | -2.625226 | 0.469182 | -0.20408 | 0.770945 | 0.0365    | 0.9974526 | hsa-miR-148a |     |

\*\* = miRNAs also present in Table 1

\*\*\* = miRNAs also present in Table 2B

Group 1: Lamb\_Male\_Panel 2  $\Delta$ Ct  
 Group 2: Lamb\_Female\_Panel 2  $\Delta$ Ct  
 Statistics: t-test  
 Correction: Benjamini and Hochberg  
 Data Transformation: Treated as Log Transformed  
 Tests: 373

Panel 2

| Number | Group 1   |          | Group 2   |          | p-value   | adj. p-value | Benjamini and Hochberg adj. p-value | Gene Name      |
|--------|-----------|----------|-----------|----------|-----------|--------------|-------------------------------------|----------------|
|        | Mean      | SEM      | Mean      | SEM      |           |              |                                     |                |
| 1      | -2.99497  | 5.735877 | 9.263835  | 1.01042  | 0.0314094 | 0.9706277    | 277                                 | hsa-miR-93*    |
| 2      | 2.687424  | 2.017335 | -6.415714 | 2.874048 | 0.0389118 | 0.9706277    | 299                                 | hsa-miR-1206   |
| 3      | 9.633758  | 1.833079 | 2.543206  | 1.520642 | 0.0176788 | 0.9706277    | 268                                 | hsa-miR-1259   |
| 4      | 8.164238  | 1.160298 | 1.235984  | 2.081364 | 0.0428787 | 0.9706277    | 207                                 | hsa-miR-409-5p |
| 5      | 4.895903  | 1.347291 | -0.910418 | 1.462716 | 0.0342215 | 0.9706277    | 247                                 | hsa-miR-634    |
| 6      | 5.789438  | 1.342987 | 0.035626  | 1.632782 | 0.0286713 | 0.9706277    | 266                                 | SNORD38B       |
| 7      | -3.749842 | 1.119237 | 1.755145  | 0.983355 | 0.0043256 | 0.7195182    | 39                                  | hsa-miR-24-2*  |
| 8      | 2.689271  | 0.883088 | -1.094628 | 1.15272  | 0.0361636 | 0.9706277    | 51                                  | hsa-miR-551a   |
| 9      | -1.278922 | 1.094116 | -5.012684 | 0.473117 | 0.0058026 | 0.7195182    | 337                                 | hsa-miR-552    |
| 10     | 2.565558  | 0.512778 | -0.659259 | 0.512333 | 0.0015227 | 0.5664547    | 101                                 | hsa-miR-541    |
| 11     | 3.427026  | 1.125129 | 0.450921  | 0.656595 | 0.0349056 | 0.9706277    | 315                                 | hsa-miR-146a*  |
| 12     | -5.727398 | 0.970281 | -8.623426 | 0.453305 | 0.013697  | 0.9706277    | 359                                 | hsa-miR-296-3p |
| 13     | 0.592549  | 0.812    | -2.074229 | 0.700335 | 0.0326683 | 0.9706277    | 150                                 | hsa-miR-769-5p |

|    |           |          |           |          |           |           |     |                |
|----|-----------|----------|-----------|----------|-----------|-----------|-----|----------------|
| 14 | -4.630924 | 0.228744 | -7.071927 | 0.845789 | 0.0396657 | 0.9706277 | 339 | hsa-miR-331-5p |
| 15 | -2.585247 | 0.722527 | -4.895344 | 0.518655 | 0.0232599 | 0.9706277 | 75  | hsa-miR-518e*  |

**Supplementary Data 2, Table 2B****Statistical Tests for effect of in utero ethanol exposure on plasma miRNA profiles in nonates**

Group 1: **Lamb\_Saline\_Panel 1  $\Delta$ Ct** **Panel 1 (1st 80 of 125 tests with raw p-value <0.05)**  
 Group 2: **Lamb\_EtOH\_Panel 1  $\Delta$ Ct**  
 Statistics: **t-test**  
 Correction: **Benjamini and Hochberg**  
 Data Transformation: **Treated as Log Transformed**  
 Tests: **378**

| Number | Group 1   |          | Group 2   |          | p-value   | Benjamini<br>and<br>Hochberg | Gene<br>Name   |
|--------|-----------|----------|-----------|----------|-----------|------------------------------|----------------|
|        | Mean      | SEM      | Mean      | SEM      |           | adj. p-<br>value             |                |
| 1      | 4.043605  | 0.649391 | -11.76869 | 2.0383   | 2.34E-05  | 0.005419                     | hsa-miR-142-5p |
| 2      | 4.910112  | 0.647503 | -1.589327 | 0.625879 | 2.87E-05  | 0.005419                     | hsa-miR-708    |
| 3      | 3.075438  | 1.123084 | -10.04115 | 1.723092 | 8.06E-05  | 0.0101613                    | hsa-miR-132    |
| 4      | -3.606363 | 0.627469 | 2.182449  | 0.759945 | 0.0001565 | 0.0147861                    | hsa-miR-484    |
| 5      | 4.808123  | 1.774014 | -12.92019 | 2.252283 | 0.0002054 | 0.0149619                    | hsa-miR-363    |
| 6      | 2.193738  | 1.19881  | -9.502483 | 1.772233 | 0.0002744 | 0.0149619                    | hsa-miR-337-3p |
| 7      | -5.88957  | 1.149142 | 4.379543  | 1.391653 | 0.0002771 | 0.0149619                    | hsa-miR-9      |
| 8      | 4.055597  | 1.847344 | -9.08916  | 1.664445 | 0.0003544 | 0.016602                     | hsa-miR-34b    |
| 9      | -2.977418 | 0.743335 | 3.47196   | 0.936644 | 0.0003953 | 0.016602                     | hsa-miR-652    |
| 10     | -0.285846 | 0.987791 | -11.88766 | 2.137071 | 0.0005978 | 0.0182017                    | hsa-miR-103    |
| 11     | -10.18216 | 1.749061 | 1.336424  | 1.173047 | 0.0005457 | 0.0182017                    | hsa-miR-134    |
| 12     | -1.391016 | 0.781669 | 8.395388  | 1.887637 | 0.000626  | 0.0182017                    | hsa-let-7a     |
| 13     | -2.878115 | 0.361653 | 0.452334  | 0.555683 | 0.0005192 | 0.0182017                    | hsa-miR-148a   |
| 14     | -9.402517 | 2.085199 | 3.993876  | 1.969671 | 0.0008803 | 0.023769                     | hsa-miR-720    |
| 15     | -3.25852  | 0.490233 | 1.11888   | 0.811981 | 0.0009577 | 0.0241347                    | hsa-miR-31     |
| 16     | -7.719827 | 1.202243 | 5.355436  | 2.796771 | 0.0013224 | 0.0272431                    | hsa-miR-637    |
| 17     | -8.550252 | 2.376843 | 4.14184   | 1.05194  | 0.0014007 | 0.0272431                    | hsa-miR-622    |
| 18     | -10.47794 | 2.56729  | 1.734705  | 0.983569 | 0.0012503 | 0.0272431                    | hsa-miR-572    |

|    |           |          |           |          |           |           |                 |
|----|-----------|----------|-----------|----------|-----------|-----------|-----------------|
| 19 | 3.25609   | 1.59777  | -6.451915 | 1.602316 | 0.0015856 | 0.0272431 | hsa-miR-129-3p  |
| 20 | -2.252131 | 0.77477  | -11.57424 | 2.019356 | 0.001537  | 0.0272431 | hsa-miR-181a    |
| 21 | -3.51968  | 1.139477 | 4.43931   | 1.122132 | 0.0014582 | 0.0272431 | hsa-miR-576-5p  |
| 22 | 5.89128   | 1.488873 | -1.227034 | 0.714428 | 0.001536  | 0.0272431 | hsa-miR-299-3p  |
| 23 | -9.78981  | 1.510272 | 1.931509  | 2.40313  | 0.0020442 | 0.0335961 | hsa-miR-934     |
| 24 | 6.394815  | 1.358114 | -5.29393  | 1.934079 | 0.0022304 | 0.0337233 | hsa-miR-379     |
| 25 | -1.233129 | 0.830324 | 4.773632  | 1.192112 | 0.0021527 | 0.0337233 | hsa-miR-524-5p  |
| 26 | -8.902097 | 2.682075 | 2.910261  | 1.226599 | 0.0024973 | 0.0342017 | hsa-miR-520c-3p |
| 27 | -2.543068 | 0.997935 | -11.79161 | 2.088069 | 0.0025335 | 0.0342017 | hsa-miR-21      |
| 28 | -4.587875 | 0.896831 | 0.10244   | 0.740781 | 0.002391  | 0.0342017 | hsa-miR-19b     |
| 29 | 3.86022   | 0.988454 | -7.2082   | 2.629111 | 0.002772  | 0.0342253 | hsa-miR-202*    |
| 30 | -2.654911 | 0.816216 | 5.785058  | 2.070956 | 0.0028168 | 0.0342253 | hsa-miR-671-5p  |
| 31 | -2.455875 | 1.009736 | 4.392793  | 1.39644  | 0.0028103 | 0.0342253 | hsa-miR-589     |
| 32 | -4.233725 | 0.937761 | 1.09505   | 0.987314 | 0.0028974 | 0.0342253 | hsa-miR-422a    |
| 33 | -4.438616 | 1.341661 | 2.413267  | 1.150189 | 0.0030726 | 0.0351954 | hsa-miR-202     |
| 34 | 1.048978  | 2.075919 | -10.6918  | 2.302011 | 0.0035573 | 0.0375362 | hsa-miR-188-5p  |
| 35 | -0.611181 | 1.213725 | -8.275448 | 1.618141 | 0.003549  | 0.0375362 | hsa-miR-187     |
| 36 | 4.913952  | 1.466718 | -1.045961 | 0.573294 | 0.0035749 | 0.0375362 | SNORD38B        |
| 37 | -2.426736 | 0.842704 | 2.784937  | 1.067359 | 0.0036827 | 0.0376236 | hsa-miR-128     |
| 38 | -8.428692 | 2.689738 | 3.486813  | 1.730459 | 0.003939  | 0.0391828 | hsa-miR-623     |
| 39 | -4.141234 | 1.384544 | 2.305657  | 0.786098 | 0.0040825 | 0.0395693 | hsa-miR-545     |
| 40 | 0.691437  | 0.892757 | -7.812767 | 2.135593 | 0.0042885 | 0.0400352 | hsa-miR-371-3p  |
| 41 | 5.843885  | 1.728028 | -1.637221 | 1.100228 | 0.0044484 | 0.0400352 | hsa-miR-425*    |
| 42 | 1.135963  | 0.462998 | -3.896701 | 1.297462 | 0.0044386 | 0.0400352 | hsa-miR-26a-2*  |
| 43 | 4.508352  | 1.650717 | -6.319555 | 2.359706 | 0.0057114 | 0.0502071 | hsa-miR-200a    |
| 44 | 6.581672  | 2.176573 | -1.43217  | 0.75762  | 0.0059487 | 0.0503116 | hsa-miR-182     |
| 45 | 5.375205  | 1.472609 | -2.210968 | 1.613167 | 0.0059895 | 0.0503116 | hsa-miR-135a    |
| 46 | -2.835931 | 0.924361 | -11.73378 | 2.460356 | 0.0069388 | 0.0536308 | hsa-let-7d*     |
| 47 | -2.927585 | 1.436687 | 4.04766   | 1.486645 | 0.0070748 | 0.0536308 | hsa-miR-615-3p  |
| 48 | -2.161709 | 1.407548 | 3.98522   | 0.922306 | 0.0069054 | 0.0536308 | hsa-miR-20a     |
| 49 | -0.851294 | 0.789993 | 4.03382   | 1.22554  | 0.007094  | 0.0536308 | hsa-miR-151-5p  |
| 50 | -0.340441 | 0.743662 | 3.02913   | 0.135168 | 0.0069709 | 0.0536308 | hsa-miR-886-5p  |
| 51 | -4.422753 | 2.552051 | 4.714768  | 1.011794 | 0.0076382 | 0.0549789 | hsa-miR-597     |
| 52 | -8.343908 | 1.8738   | 0.352403  | 1.839454 | 0.0078541 | 0.0549789 | hsa-miR-18b     |
| 53 | 6.127268  | 1.861017 | -2.459696 | 1.793023 | 0.0077107 | 0.0549789 | hsa-miR-299-5p  |
| 54 | 3.079125  | 1.223297 | -3.157395 | 1.427816 | 0.0077873 | 0.0549789 | hsa-miR-194     |
| 55 | -4.4463   | 2.291388 | 5.693632  | 1.815944 | 0.0083814 | 0.0561129 | hsa-miR-154*    |
| 56 | -4.155941 | 1.556298 | 1.912978  | 1.013432 | 0.0084615 | 0.0561129 | hsa-miR-451     |



|    |           |          |           |          |           |           |                 |
|----|-----------|----------|-----------|----------|-----------|-----------|-----------------|
| 57 | 2.682342  | 1.441379 | -3.227342 | 1.086217 | 0.0083684 | 0.0561129 | hsa-miR-220a    |
| 58 | -5.865538 | 1.769718 | 1.748827  | 0.172697 | 0.0088821 | 0.0569056 | hsa-miR-423-3p  |
| 59 | 3.851384  | 1.142529 | -0.549407 | 0.731917 | 0.0088191 | 0.0569056 | hsa-miR-7       |
| 60 | 4.022322  | 1.401102 | -1.222356 | 0.405253 | 0.0093001 | 0.0585903 | hsa-miR-517c    |
| 61 | 1.364741  | 1.213064 | -4.675546 | 1.450918 | 0.009591  | 0.0594326 | hsa-miR-19a     |
| 62 | 0.264602  | 1.193136 | -6.683978 | 1.885625 | 0.0109857 | 0.0632601 | hsa-miR-595     |
| 63 | 3.603534  | 1.510001 | -3.18409  | 1.559964 | 0.0107565 | 0.0632601 | hsa-miR-198     |
| 64 | 2.969692  | 1.231692 | -2.231048 | 1.130461 | 0.0110454 | 0.0632601 | hsa-miR-373     |
| 65 | 0.13118   | 1.212013 | 5.267442  | 0.974441 | 0.0107539 | 0.0632601 | hsa-miR-26a     |
| 66 | -0.068617 | 0.758115 | 3.708005  | 0.94056  | 0.0107598 | 0.0632601 | hsa-miR-211     |
| 67 | 6.12017   | 2.585372 | -3.133176 | 1.657014 | 0.0123402 | 0.0681868 | hsa-miR-133a    |
| 68 | -5.803221 | 2.356882 | 3.11146   | 1.749546 | 0.0125246 | 0.0681868 | hsa-miR-331-3p  |
| 69 | 3.296641  | 1.115979 | -4.628585 | 2.361462 | 0.0125844 | 0.0681868 | hsa-miR-136     |
| 70 | 0.534028  | 1.304073 | -5.810612 | 1.643588 | 0.0128076 | 0.0681868 | hsa-miR-125b    |
| 71 | -3.147888 | 1.446866 | 3.076185  | 1.458584 | 0.0126877 | 0.0681868 | hsa-miR-99b     |
| 72 | -11.38288 | 1.734604 | -0.833394 | 3.185967 | 0.013749  | 0.0702312 | hsa-miR-374b*   |
| 73 | -1.42457  | 1.900425 | -8.130035 | 1.191949 | 0.0135941 | 0.0702312 | hsa-miR-631     |
| 74 | -2.2029   | 1.11898  | 1.59743   | 0.609251 | 0.0137421 | 0.0702312 | hsa-miR-433     |
| 75 | 0.999101  | 0.918363 | -3.81472  | 1.351358 | 0.0146281 | 0.0737257 | hsa-miR-429     |
| 76 | -6.993478 | 1.839112 | -0.628664 | 1.163582 | 0.0151802 | 0.0739288 | hsa-miR-181a*   |
| 77 | -1.339545 | 1.308663 | 3.501558  | 0.814481 | 0.0153733 | 0.0739288 | hsa-miR-15b     |
| 78 | 4.112237  | 1.10072  | -0.260415 | 1.013537 | 0.0152388 | 0.0739288 | hsa-miR-146b-5p |
| 79 | 4.648495  | 0.811606 | 1.085938  | 0.914146 | 0.0154507 | 0.0739288 | hsa-miR-33b     |
| 80 | -0.15997  | 1.4419   | 5.432354  | 1.149787 | 0.0164879 | 0.0779053 | hsa-miR-506     |

Group 1: Lamb\_Saline\_Panel 2  $\Delta$ Ct  
Group 2: Lamb\_EtOH\_Panel 2  $\Delta$ Ct  
Statistics: t-test  
Correction: Benjamini and Hochberg  
Data Transformation: Treated as Log Transformed  
Tests: 373

Panel 2

| Number | Group 1   |          | Group 2   |          | p-value   | Benjamini<br>and<br>Hochberg<br>adj. p-<br>value | Gene<br>Name      |
|--------|-----------|----------|-----------|----------|-----------|--------------------------------------------------|-------------------|
|        | Mean      | SEM      | Mean      | SEM      |           |                                                  |                   |
| 1      | 6.500845  | 1.138579 | -1.18382  | 1.233679 | 0.0013422 | 0.4992923                                        | hsa-miR-432*      |
| 2      | 6.228673  | 1.037361 | 0.411353  | 1.197564 | 0.0092483 | 0.8600953                                        | hsa-miRPlus-C1100 |
| 3      | 0.577223  | 1.879198 | 6.324113  | 1.33102  | 0.0316857 | 0.9727682                                        | hsa-miR-452*      |
| 4      | 4.25542   | 1.179719 | -1.429815 | 1.537019 | 0.0149327 | 0.9727682                                        | hsa-miR-223*      |
| 5      | -1.235248 | 1.480106 | -6.551332 | 1.669065 | 0.0384129 | 0.9727682                                        | hsa-miRPlus-D1061 |
| 6      | 0.835369  | 0.814975 | -2.889967 | 0.5837   | 0.0039998 | 0.7044876                                        | hsa-miR-593       |
| 7      | 3.932762  | 0.666862 | 7.208323  | 0.399619 | 0.0056814 | 0.7044876                                        | hsa-miR-1200      |
| 8      | 0.343971  | 0.971718 | 2.865223  | 0.567145 | 0.0489311 | 0.9727682                                        | hsa-miR-101*      |
