# Supplementary material
Source: PubMed Central journal article supplement (PMC3999266)
Supplement: NIHMS567198-supplement-Supp_Data_S3.pdf [file NIHMS567198-supplement-Supp_Data_S3.pdf]

## Supplementary Data 3

### Selected KEGG Pathways predicted to be targeted by PCA component 1 miRNAs\*

| KEGG pathway                                         | p-value  | #genes | #miRNAs |
|------------------------------------------------------|----------|--------|---------|
| PI3K-Akt signaling pathway                           | 4.50E-16 | 104    | 7       |
| Focal adhesion                                       | 4.50E-16 | 70     | 7       |
| MAPK signaling pathway                               | 7.43E-16 | 86     | 8       |
| Neurotrophin signaling pathway                       | 1.29E-15 | 48     | 7       |
| mTOR signaling pathway                               | 2.82E-14 | 29     | 7       |
| TGF-beta signaling pathway                           | 5.46E-14 | 36     | 7       |
| p53 signaling pathway                                | 1.73E-13 | 30     | 7       |
| Axon guidance                                        | 3.07E-13 | 49     | 7       |
| Gap junction                                         | 1.83E-12 | 34     | 7       |
| Regulation of actin cytoskeleton                     | 1.00E-11 | 70     | 7       |
| Endocytosis                                          | 1.49E-11 | 67     | 8       |
| Wnt signaling pathway                                | 4.73E-11 | 54     | 8       |
| Insulin signaling pathway                            | 5.40E-10 | 46     | 7       |
| Glycosaminoglycan biosynthesis - chondroitin sulfate | 1.07E-09 | 9      | 4       |
| Fatty acid biosynthesis                              | 2.98E-09 | 2      | 1       |
| ErbB signaling pathway                               | 5.00E-09 | 34     | 7       |
| Calcium signaling pathway                            | 7.23E-09 | 56     | 8       |

\*PCA component 1 miRNAs assessed:

Let-7a-5p  
Let-7d\*  
miR-15b-5p  
miR-19b-3p  
miR-20a-5p  
miR-34b-3p  
miR-570-3p  
miR-572  
miR-720  
miR-9-5p
